# Supplementary material for: Contributions of lunate cells and wax crystals to the surface anisotropy of Nepenthes slippery zone
Source: R Soc Open Sci. 2018 Sep 5;5(9):180766. doi: 10.1098/rsos.180766 (PMC6170553; doi:10.1098/rsos.180766)
Supplement: Data of Figure7 (AFM Scanning) 800-3000nN [file rsos180766supp7.xls]

## Sheet: Sheet1
No	1100 nN-T	1100 nN-RT	No	1650 nN-T	1650 nN-RT	No	2300 nN-T	2300 nN-RT
1	0.077523	0.0737607	1	0.0819826	0.0752854	1	0.0853968	0.0769699
2	0.077455	0.0735891	2	0.0819063	0.0759137	2	0.0854874	0.0769341
3	0.0777519	0.073632	3	0.0819957	0.0751925	3	0.0855625	0.0772822
4	0.0778043	0.073539	4	0.0819969	0.075165	4	0.084964	0.0765944
5	0.077852	0.0735629	5	0.0818884	0.0758374	5	0.085336	0.077219
6	0.0777531	0.0734627	6	0.0819027	0.075829	6	0.0851834	0.077455
7	0.0775528	0.0735044	7	0.0820684	0.0762486	7	0.0849533	0.076735
8	0.0775731	0.0735366	8	0.0820029	0.0758088	8	0.0851071	0.076983
9	0.0775266	0.073514	9	0.0818741	0.0762951	9	0.0850511	0.0772405
10	0.077529	0.0735176	10	0.0818002	0.0757492	10	0.0854397	0.0768411
11	0.0774586	0.0735033	11	0.0818229	0.0749099	11	0.0853348	0.0764632
12	0.0775361	0.0735414	12	0.0817668	0.0757575	12	0.0848675	0.0764835
13	0.0775325	0.0735199	13	0.0820565	0.0755715	13	0.0851798	0.0769746
14	0.0774062	0.0734878	14	0.0819242	0.075835	14	0.0852883	0.0768542
15	0.0773716	0.0735295	15	0.0818002	0.0756204	15	0.0854111	0.0754809
16	0.0774407	0.0736129	16	0.0818157	0.0757527	16	0.0852287	0.0764155
17	0.0774622	0.073545	17	0.0820351	0.0755394	17	0.0850832	0.0766301
18	0.0773883	0.0735033	18	0.0819123	0.0759804	18	0.0852799	0.0772119
19	0.0773537	0.0734842	19	0.0818276	0.0757456	19	0.0852489	0.0770628
20	0.0773311	0.0735486	20	0.0820124	0.0758278	20	0.0852263	0.0767541
21	0.0773954	0.0736582	21	0.0819063	0.0761831	21	0.0854111	0.077424
22	0.0775826	0.0736833	22	0.0814915	0.075053	22	0.08551	0.0769329
23	0.0776613	0.0736356	23	0.081557	0.0754929	23	0.0853264	0.0770581
24	0.0776684	0.0736427	24	0.0817859	0.075779	24	0.0853312	0.0762057
25	0.0777316	0.0735939	25	0.0817251	0.0757396	25	0.0855422	0.0766599
26	0.0776947	0.0735664	26	0.0818026	0.0756717	26	0.0855434	0.0771964
27	0.0775921	0.073638	27	0.0817156	0.0754321	27	0.0852001	0.0763059
28	0.0775015	0.0736535	28	0.0816727	0.0761223	28	0.0853145	0.0773287
29	0.0775325	0.0736225	29	0.0818825	0.0747585	29	0.0854337	0.077374
30	0.077455	0.0736701	30	0.0818515	0.0756705	30	0.0853276	0.0765204
31	0.0774765	0.0735593	31	0.0816727	0.0762343	31	0.0854886	0.0768983
32	0.0774443	0.0736773	32	0.0817788	0.075686	32	0.0852799	0.0773573
33	0.0774276	0.073595	33	0.0818288	0.0754726	33	0.08533	0.0780141
34	0.0773382	0.0735295	34	0.0816035	0.0755954	34	0.0853574	0.0763357
35	0.0773954	0.0736272	35	0.0816607	0.0751102	35	0.0854731	0.0772738
36	0.0774205	0.073812	36	0.0816965	0.0756633	36	0.0856483	0.076921
37	0.0774395	0.0738251	37	0.0817406	0.0758088	37	0.0855756	0.0772798
38	0.0775456	0.0739336	38	0.081532	0.0755608	38	0.0855088	0.0766015
39	0.0776494	0.0739169	39	0.0815165	0.0763333	39	0.0851774	0.0770724
40	0.0777876	0.0739324	40	0.0816071	0.0759351	40	0.0849259	0.0772727
41	0.0777841	0.0739849	41	0.0816739	0.0759459	41	0.0851059	0.0770724
42	0.0777853	0.0739491	42	0.0818455	0.0760734	42	0.0853395	0.0755775
43	0.0777674	0.0739443	43	0.0818145	0.0762761	43	0.0848806	0.0763416
44	0.0776279	0.0739467	44	0.0819051	0.0756466	44	0.0850356	0.0765407
45	0.0775778	0.073868	45	0.0817108	0.0761259	45	0.085057	0.0758851
46	0.0776672	0.0738931	46	0.0817895	0.0763059	46	0.0849628	0.0772619
47	0.0777543	0.0739086	47	0.0818634	0.0757182	47	0.0848889	0.0761211
48	0.0778961	0.0738931	48	0.0816536	0.0760698	48	0.0850236	0.0767493
49	0.0779891	0.0739336	49	0.0816619	0.0757182	49	0.0850511	0.0764179
50	0.0780272	0.073967	50	0.0815666	0.0760424	50	0.0849032	0.0763834
51	0.0781631	0.0740337	51	0.0816381	0.0759768	51	0.0849152	0.076288
52	0.0781786	0.0740552	52	0.0815213	0.0758827	52	0.084908	0.0759494
53	0.0782025	0.07406	53	0.0816572	0.0757873	53	0.0848973	0.0767446
54	0.0783014	0.0741029	54	0.081799	0.076077	54	0.0849485	0.0771248
55	0.0782645	0.0740564	55	0.0819063	0.0756037	55	0.0850236	0.0767958
56	0.0783241	0.0740743	56	0.0818288	0.0759518	56	0.0848377	0.0761724
57	0.0782728	0.0740218	57	0.0812972	0.075593	57	0.085057	0.0761127
58	0.0782728	0.0740826	58	0.0811088	0.0756669	58	0.0850022	0.0761998
59	0.0783098	0.0740623	59	0.0811982	0.0753045	59	0.0849235	0.0764835
60	0.0782609	0.0740898	60	0.0814009	0.0757551	60	0.085026	0.0765908
61	0.0783515	0.0741529	61	0.0813556	0.0750542	61	0.0851834	0.0744236
62	0.0784433	0.074203	62	0.0812435	0.075357	62	0.085156	0.076369
63	0.0784314	0.0742018	63	0.0816667	0.0750017	63	0.0852287	0.0763655
64	0.0782752	0.0742924	64	0.0819349	0.0746608	64	0.085218	0.0754261
65	0.0775528	0.073787	65	0.0819993	0.0753188	65	0.0854111	0.0769258
66	0.0775266	0.0736344	66	0.0818169	0.0758195	66	0.0855148	0.0767386
67	0.0777566	0.0736117	67	0.0819898	0.0751555	67	0.0856757	0.0771868
68	0.0778365	0.0735068	68	0.0819421	0.0753236	68	0.0851047	0.0766337
69	0.0779307	0.0734973	69	0.0818634	0.075866	69	0.0852311	0.0771272
70	0.0779092	0.0735116	70	0.0818491	0.0757992	70	0.0850821	0.07743
71	0.0777221	0.073514	71	0.0820851	0.0762284	71	0.0850308	0.0768793
72	0.077647	0.0735986	72	0.0819147	0.075959	72	0.0852072	0.0770271
73	0.0775313	0.07357	73	0.0818312	0.0763166	73	0.0851178	0.0772047
74	0.0775373	0.0735128	74	0.0817704	0.0759506	74	0.085392	0.0769663
75	0.0774205	0.0735474	75	0.0819695	0.075084	75	0.0853002	0.0763857
76	0.0775456	0.0734901	76	0.0818777	0.0757825	76	0.0849438	0.0767112
77	0.0775027	0.0735307	77	0.0820208	0.0755775	77	0.0852609	0.0769925
78	0.077405	0.0735104	78	0.0818884	0.0758302	78	0.0853169	0.0768232
79	0.0773585	0.0735521	79	0.0818467	0.0756109	79	0.0853157	0.0754488
80	0.0773072	0.0735044	80	0.0818968	0.0757194	80	0.0852656	0.076431
81	0.0773501	0.0734866	81	0.0820947	0.0755572	81	0.085156	0.0767565
82	0.0773454	0.0733793	82	0.0819218	0.0757968	82	0.0853837	0.0772953
83	0.0773787	0.073477	83	0.0818634	0.0758052	83	0.0853646	0.0770998
84	0.0772762	0.0736177	84	0.0819635	0.0757015	84	0.0852036	0.0767827
85	0.077287	0.0736856	85	0.0818455	0.076288	85	0.0853109	0.077343
86	0.0774169	0.0737071	86	0.0815296	0.0750351	86	0.0854635	0.0766921
87	0.0776267	0.0736344	87	0.0815403	0.0754678	87	0.0852168	0.077033
88	0.0776339	0.0735819	88	0.0817227	0.0757861	88	0.0853539	0.0763667
89	0.0777137	0.0735426	89	0.0817275	0.0756621	89	0.0854743	0.076654
90	0.0777018	0.073539	90	0.0818419	0.0755966	90	0.0855529	0.0772417
91	0.0776398	0.073626	91	0.0816584	0.0754106	91	0.0851703	0.0762928
92	0.0775981	0.0737035	92	0.081625	0.0761855	92	0.085274	0.0772727
93	0.0775623	0.0736773	93	0.0818622	0.0748289	93	0.0855672	0.0774872
94	0.0774622	0.0736606	94	0.0818443	0.075655	94	0.085541	0.0765598
95	0.0774395	0.0736225	95	0.0816906	0.0762224	95	0.0854242	0.0768685
96	0.0774193	0.0736678	96	0.0817263	0.0756383	96	0.0853026	0.0772965
97	0.077492	0.0735712	97	0.0817192	0.0754094	97	0.0853479	0.0781512
98	0.0774205	0.0735772	98	0.0815213	0.0755918	98	0.0853622	0.0763905
99	0.0774801	0.0736153	99	0.0816464	0.0751376	99	0.0854719	0.0772154
100	0.0774145	0.0738668	100	0.0817347	0.0756276	100	0.0856149	0.0769246
101	0.0774109	0.0738835	101	0.081681	0.0757217	101	0.0855994	0.0772977
102	0.0774717	0.0738931	102	0.081532	0.0755346	102	0.0853252	0.07653
103	0.0776315	0.0738907	103	0.0816083	0.0762641	103	0.085094	0.0771463
104	0.0777102	0.073905	104	0.0816512	0.0759888	104	0.0848258	0.0771654
105	0.0777411	0.0739503	105	0.0817072	0.0760019	105	0.0851405	0.0771546
106	0.0777864	0.0738597	106	0.0819004	0.0759578	106	0.0855041	0.0754666
107	0.0778258	0.0738823	107	0.0817752	0.0762904	107	0.0850236	0.0763869
108	0.0776792	0.0739527	108	0.0818527	0.0756371	108	0.0849605	0.0765145
109	0.0776279	0.0739026	109	0.0817537	0.0762475	109	0.0850034	0.0757432
110	0.0777078	0.0738847	110	0.0818574	0.0763237	110	0.0848854	0.0771773
111	0.0776744	0.0739121	111	0.0818229	0.0757325	111	0.0849342	0.076133
112	0.0778317	0.073812	112	0.0816035	0.0760245	112	0.085063	0.0768065
113	0.0779545	0.0738716	113	0.0816965	0.0757062	113	0.0850761	0.0764632
114	0.0780284	0.0739098	114	0.0815153	0.0760937	114	0.0849521	0.0764871
115	0.078187	0.0739336	115	0.0816751	0.0759268	115	0.0848842	0.0761569
116	0.0780928	0.0740147	116	0.0816834	0.0758505	116	0.0849271	0.0761342
117	0.0781322	0.0740159	117	0.0817919	0.0757432	117	0.0849199	0.0767481
118	0.078249	0.0741339	118	0.081991	0.0760925	118	0.0849748	0.0771105
119	0.0782013	0.0740039	119	0.0820971	0.0756311	119	0.0849593	0.0768816
120	0.0782526	0.0740767	120	0.0818038	0.0759029	120	0.0848222	0.0763452
121	0.0782835	0.0740623	121	0.0811338	0.0755262	121	0.0850737	0.0761414
122	0.0782764	0.0740349	122	0.0810754	0.0755644	122	0.0850093	0.0761938
123	0.0783134	0.0740075	123	0.0813448	0.0753248	123	0.084902	0.0764835
124	0.0782621	0.0741339	124	0.0814879	0.0757241	124	0.0850475	0.0766873
125	0.078367	0.0741768	125	0.0811708	0.0751173	125	0.0853455	0.0743747
126	0.0784004	0.074178	126	0.0813007	0.0754499	126	0.0851524	0.0762475
127	0.0784397	0.0741374	127	0.081836	0.0751293	127	0.0852764	0.0764441
128	0.0783277	0.0742722	128	0.0821054	0.0747645	128	0.085206	0.0752711
129	0.0775659	0.0737846	129	0.0818634	0.0753522	129	0.0854504	0.0767386
130	0.0775528	0.0736678	130	0.0817978	0.0757682	130	0.0854814	0.0767243
131	0.0778532	0.07357	131	0.0819993	0.0751007	131	0.0857162	0.0770783
132	0.0778854	0.0735021	132	0.0820148	0.0753987	132	0.0851905	0.0766063
133	0.0779569	0.0734985	133	0.0819409	0.0759375	133	0.0851715	0.0770807
134	0.0779915	0.0736034	134	0.0818765	0.0757718	134	0.0850272	0.0774014
135	0.0778627	0.0736082	135	0.0819898	0.0761485	135	0.0851285	0.0769567
136	0.0777471	0.0736439	136	0.0819004	0.0761068	136	0.0853217	0.0770116
137	0.0776017	0.0736129	137	0.0818121	0.0762582	137	0.0850928	0.0772858
138	0.0775409	0.0735843	138	0.0818563	0.0760519	138	0.0853646	0.0771308
139	0.0774217	0.0735664	139	0.0820506	0.07532	139	0.0854421	0.0763416
140	0.0775361	0.0734675	140	0.0819457	0.0758159	140	0.0849986	0.0768697
141	0.0774491	0.0735211	141	0.0819576	0.0756764	141	0.0852633	0.0770426
142	0.0774539	0.0736082	142	0.0819373	0.0758314	142	0.0853801	0.0769222
143	0.0773883	0.0735116	143	0.0819218	0.0755	143	0.0851929	0.075444
144	0.077306	0.0734341	144	0.0818896	0.0756967	144	0.0852048	0.0764799
145	0.0773478	0.0734234	145	0.0821018	0.0756288	145	0.0851774	0.0768924
146	0.0773096	0.0734198	146	0.0818896	0.0756752	146	0.0854409	0.0773013
147	0.0773501	0.0735378	147	0.0818288	0.0757968	147	0.0853968	0.0771987
148	0.0772941	0.0736248	148	0.082022	0.0756204	148	0.0850868	0.0768304
149	0.0772572	0.0737381	149	0.0817657	0.0762701	149	0.0852072	0.0772536
150	0.0773919	0.0737023	150	0.0816011	0.0751209	150	0.0855291	0.0764906
151	0.0775635	0.0736213	151	0.0815821	0.0755012	151	0.0850558	0.077064
152	0.077672	0.0735795	152	0.0816906	0.0756824	152	0.0854862	0.0764215
153	0.0776756	0.0735295	153	0.0817132	0.0756633	153	0.0853634	0.0766623
154	0.0777614	0.0736225	154	0.0818169	0.075568	154	0.0855172	0.0772202
155	0.0776887	0.0736868	155	0.0816238	0.0754082	155	0.0851035	0.0762486
156	0.0776923	0.0737751	156	0.0815868	0.0761878	156	0.0853121	0.0771594
157	0.0776458	0.0737417	157	0.0817728	0.0750005	157	0.0856614	0.0776112
158	0.0774693	0.0736988	158	0.0818336	0.0756323	158	0.085566	0.0766158
159	0.0774598	0.0736785	159	0.0817585	0.0761819	159	0.0854123	0.0769031
160	0.0774002	0.0736618	160	0.0816798	0.075624	160	0.0853801	0.0772548
161	0.077486	0.073663	161	0.0816917	0.0753558	161	0.0854325	0.0781405
162	0.0775027	0.0736892	162	0.0814939	0.0756752	162	0.0852549	0.0764
163	0.0775313	0.0736427	163	0.0816488	0.0752926	163	0.085423	0.0772488
164	0.0774288	0.0738156	164	0.0817001	0.0756776	164	0.0855243	0.0769448
165	0.0774038	0.0738668	165	0.0815535	0.0757217	165	0.085516	0.0773191
166	0.0774014	0.0738597	166	0.0815535	0.0756049	166	0.0852382	0.0765121
167	0.0775099	0.0739181	167	0.0816321	0.0762284	167	0.085007	0.0770485
168	0.0776505	0.0738358	168	0.0816584	0.0759757	168	0.0848818	0.0770366
169	0.0776577	0.0738561	169	0.0817227	0.0760651	169	0.0852346	0.0772297
170	0.0777769	0.0738382	170	0.0818694	0.07586	170	0.0854135	0.0756025
171	0.0777972	0.0739086	171	0.081718	0.0761855	171	0.0849593	0.0763762
172	0.0777113	0.0739276	172	0.0818646	0.0756502	172	0.0849509	0.0765717
173	0.0776803	0.0738931	173	0.0818372	0.0763202	173	0.0849319	0.0756371
174	0.0777411	0.0738239	174	0.0819039	0.0763428	174	0.0848889	0.0771308
175	0.0776732	0.0738668	175	0.081805	0.0757539	175	0.0850236	0.0762355
176	0.0777817	0.0738227	176	0.0816929	0.0759947	176	0.0850606	0.0768805
177	0.0778759	0.0738251	177	0.0817144	0.0757527	177	0.0850701	0.0765193
178	0.0779843	0.073843	178	0.0815892	0.0761557	178	0.0849628	0.0765264
179	0.0781167	0.0738943	179	0.0817752	0.0760698	179	0.0848019	0.076077
180	0.0780857	0.0739932	180	0.0818443	0.075866	180	0.0847363	0.0762153
181	0.0781155	0.0739753	181	0.0819314	0.0757468	181	0.0849366	0.0767064
182	0.0782013	0.0740612	182	0.0820792	0.0760472	182	0.0850081	0.0769842
183	0.078156	0.073992	183	0.0820553	0.0757134	183	0.0849628	0.0769269
184	0.0781846	0.0740135	184	0.0815833	0.0758898	184	0.0848305	0.0764263
185	0.0782752	0.0740671	185	0.081073	0.0754356	185	0.0852096	0.0761688
186	0.0782585	0.0740421	186	0.0811577	0.0754547	186	0.0849915	0.0763082
187	0.0783014	0.0739992	187	0.081501	0.0753021	187	0.0849509	0.0765169
188	0.0782442	0.0741363	188	0.0814724	0.0756574	188	0.0850916	0.0769114
189	0.0783646	0.0741136	189	0.0811934	0.0751567	189	0.0853181	0.0743711
190	0.0783479	0.0741041	190	0.081408	0.0755656	190	0.085156	0.0760913
191	0.0784075	0.0741029	191	0.0819814	0.0752473	191	0.0853622	0.0765169
192	0.0783515	0.074234	192	0.0822043	0.074811	192	0.0853086	0.0749934
193	0.0776041	0.07375	193	0.0817752	0.0754261	193	0.0854707	0.0766158
194	0.0776005	0.073595	194	0.0817561	0.0758159	194	0.0855052	0.0767529
195	0.0778675	0.0735438	195	0.0820017	0.075084	195	0.0857019	0.0771475
196	0.0779784	0.0735509	196	0.082022	0.0754046	196	0.0851572	0.0766647
197	0.0779915	0.0735879	197	0.0819337	0.075947	197	0.0851691	0.0769651
198	0.0780094	0.073607	198	0.0818646	0.0757027	198	0.0850964	0.0773776
199	0.0779176	0.0736463	199	0.0818694	0.0761092	199	0.0851727	0.0770307
200	0.0778794	0.0736105	200	0.0818563	0.0760961	200	0.0852776	0.0769556
201	0.0776422	0.073626	201	0.0818682	0.0763381	201	0.0851166	0.0773358
202	0.0774872	0.0736201	202	0.0818896	0.0760412	202	0.0853896	0.077225
203	0.0773978	0.0736117	203	0.0820088	0.0754666	203	0.0855219	0.076282
204	0.0775325	0.0735414	204	0.0818503	0.0759542	204	0.0850761	0.0769329
205	0.0774682	0.0735354	205	0.0820148	0.0757837	205	0.0853479	0.0770402
206	0.0774765	0.0736058	206	0.0819671	0.0758553	206	0.0853014	0.0770998
207	0.0773799	0.0734711	207	0.0819564	0.075475	207	0.0851083	0.0755668
208	0.0773299	0.073458	208	0.0818717	0.0757742	208	0.0851202	0.0765109
209	0.0773764	0.0734639	209	0.0820231	0.0757873	209	0.0852799	0.0769413
210	0.0772703	0.0735319	210	0.081867	0.0757134	210	0.0853968	0.0773001
211	0.0773072	0.0735807	211	0.0818026	0.0759196	211	0.085299	0.077275
212	0.0773013	0.0736356	212	0.0820601	0.0755715	212	0.0848854	0.076859
213	0.0772953	0.0737309	213	0.0817621	0.0762665	213	0.0852239	0.0772309
214	0.0774562	0.0737262	214	0.0816953	0.0751066	214	0.0854647	0.0764716
215	0.0775135	0.0736475	215	0.0816786	0.0756276	215	0.0851357	0.0769413
216	0.0776386	0.0736284	216	0.0817561	0.0757241	216	0.085479	0.0764763
217	0.0777137	0.0736332	217	0.081799	0.0757444	217	0.0853384	0.0767481
218	0.0777137	0.0737274	218	0.0818038	0.0755286	218	0.0855601	0.0773382
219	0.0777137	0.0737751	219	0.0817502	0.0754583	219	0.0852096	0.0761938
220	0.0776815	0.0737858	220	0.081557	0.0761819	220	0.0855303	0.0769639
221	0.0777376	0.0737357	221	0.08165	0.075053	221	0.0855935	0.0776863
222	0.0775957	0.0737119	222	0.0816405	0.075717	222	0.0854623	0.0767028
223	0.0775993	0.0737059	223	0.0817168	0.0761878	223	0.0854921	0.0769627
224	0.0775254	0.0737858	224	0.0816572	0.0756812	224	0.0855136	0.077281
225	0.0774872	0.0737631	225	0.0816953	0.0754309	225	0.0854278	0.0780153
226	0.0774825	0.07375	226	0.0815225	0.0757754	226	0.0851846	0.0763941
227	0.077548	0.073756	227	0.081563	0.0753796	227	0.0853658	0.077213
228	0.0774705	0.0738013	228	0.0815868	0.0756276	228	0.0854516	0.0770164
229	0.0774813	0.0738716	229	0.081507	0.0758708	229	0.0854492	0.0773382
230	0.0774205	0.0738323	230	0.0816071	0.0756276	230	0.0850689	0.0764632
231	0.0774276	0.0738811	231	0.0816083	0.0761735	231	0.0849962	0.0768805
232	0.0775981	0.0738299	232	0.08178	0.0759614	232	0.0849783	0.076946
233	0.0776219	0.0738311	233	0.0816762	0.0761426	233	0.0852597	0.0771224
234	0.0777972	0.0738525	234	0.0818539	0.0757968	234	0.0852859	0.0756764
235	0.0777912	0.0738847	235	0.0816655	0.0760663	235	0.0848567	0.0763845
236	0.0777185	0.0739026	236	0.0818455	0.0756621	236	0.0849903	0.0766611
237	0.0776935	0.0738525	237	0.0819159	0.0763166	237	0.0849974	0.0755918
238	0.077703	0.073787	238	0.0818396	0.0763047	238	0.0848532	0.0770223
239	0.0777471	0.0737786	239	0.0818133	0.0757921	239	0.0850594	0.0761437
240	0.0777233	0.0738525	240	0.0817263	0.076009	240	0.0850844	0.0768936
241	0.0777829	0.0738132	241	0.0816834	0.0757492	241	0.085007	0.0765073
242	0.077939	0.0738192	242	0.0817382	0.0761735	242	0.0849843	0.0765336
243	0.0780833	0.0738418	243	0.0818264	0.0762093	243	0.0846958	0.0761223
244	0.0780237	0.0739336	244	0.0819063	0.0759876	244	0.0845921	0.0761819
245	0.0781369	0.073936	245	0.081991	0.0758374	245	0.0847983	0.07658
246	0.0782096	0.0740111	246	0.081954	0.0760317	246	0.085113	0.0768065
247	0.0780773	0.0739706	247	0.0818682	0.0757015	247	0.0850976	0.0769186
248	0.0781941	0.0739527	248	0.0814021	0.0758076	248	0.0849056	0.0763416
249	0.0781584	0.0740385	249	0.0811243	0.0754499	249	0.0851583	0.0761461
250	0.0782382	0.0740612	250	0.0813329	0.0752699	250	0.0850189	0.076468
251	0.0782776	0.0740314	251	0.081625	0.0752532	251	0.0849926	0.0765026
252	0.0782359	0.0740671	252	0.0813925	0.0755119	252	0.085063	0.0770807
253	0.0783134	0.0740254	253	0.0812948	0.075109	253	0.0853431	0.0744152
254	0.0783193	0.0740814	254	0.0815904	0.0756931	254	0.0850797	0.0760305
255	0.0783992	0.0741088	255	0.0821137	0.075295	255	0.0854647	0.0764501
256	0.0783134	0.0742459	256	0.082339	0.0748754	256	0.0853765	0.0749469
257	0.0775802	0.0737035	257	0.0818169	0.0754189	257	0.0854445	0.0766015
258	0.0776613	0.073576	258	0.0819004	0.0757945	258	0.085485	0.0767171
259	0.0779653	0.0735462	259	0.0819898	0.0751412	259	0.0856984	0.0772214
260	0.0780749	0.073638	260	0.0819862	0.075388	260	0.0851786	0.0767457
261	0.0780809	0.0736737	261	0.0819552	0.0758505	261	0.0851786	0.0768471
262	0.0780189	0.0736523	262	0.0818908	0.0756979	262	0.085218	0.0773275
263	0.0779557	0.0736415	263	0.0817621	0.0760746	263	0.0851357	0.0771224
264	0.0779104	0.0735891	264	0.0819469	0.0760615	264	0.0851238	0.0769234
265	0.077709	0.0735629	265	0.0820005	0.0764334	265	0.0852096	0.0773406
266	0.0775099	0.0736475	266	0.0819552	0.0758922	266	0.0855124	0.0773168
267	0.0774086	0.0736856	267	0.0820291	0.0754869	267	0.0855625	0.0762451
268	0.0774884	0.0736225	268	0.0819743	0.0760043	268	0.0851774	0.0769401
269	0.0774789	0.0735402	269	0.082078	0.0758553	269	0.0853705	0.0769782
270	0.0774658	0.0736189	270	0.0820112	0.0759161	270	0.0852239	0.0771356
271	0.0774217	0.0734925	271	0.0820088	0.0755656	271	0.0850523	0.0757563
272	0.0773716	0.0734854	272	0.0819075	0.0758159	272	0.0850999	0.0765288
273	0.0774384	0.0735283	273	0.081985	0.0758636	273	0.0852549	0.0768876
274	0.0773001	0.0736463	274	0.0818169	0.0757706	274	0.085206	0.077275
275	0.0772595	0.0736606	275	0.0819182	0.076009	275	0.0852215	0.0773311
276	0.0773048	0.0736403	276	0.0821579	0.0754416	276	0.0848067	0.0768995
277	0.0773382	0.073719	277	0.0817788	0.0762582	277	0.0851929	0.0772762
278	0.0775111	0.0737762	278	0.0816405	0.075165	278	0.0855422	0.0764918
279	0.0775707	0.0736737	279	0.0816965	0.0757384	279	0.0853312	0.0768256
280	0.0775778	0.0736964	280	0.0818539	0.0757563	280	0.0855279	0.0764716
281	0.0776303	0.0737154	281	0.0819075	0.0758612	281	0.0852966	0.0768626
282	0.0776672	0.0737667	282	0.0817215	0.0755525	282	0.0855899	0.07743
283	0.0777256	0.0737619	283	0.081805	0.0755394	283	0.0852942	0.0761533
284	0.0777543	0.0737476	284	0.0815976	0.0761163	284	0.0855923	0.0769031
285	0.0778043	0.0736964	285	0.0814807	0.0750887	285	0.0853992	0.0776684
286	0.0776494	0.0737488	286	0.0816023	0.0757301	286	0.0853348	0.0767279
287	0.0776815	0.0737965	287	0.0817776	0.0762057	287	0.0855589	0.0769114
288	0.0775921	0.0738716	288	0.0816226	0.0757527	288	0.0857186	0.0773597
289	0.0776017	0.0738323	289	0.0818193	0.0754309	289	0.0854015	0.0780058
290	0.0775123	0.0737953	290	0.0814271	0.0758731	290	0.0850844	0.0762355
291	0.0775957	0.0738144	291	0.0814605	0.0753462	291	0.0852501	0.0770819
292	0.0775588	0.073849	292	0.0815141	0.0756872	292	0.0854146	0.0769329
293	0.0775659	0.0738347	293	0.0816464	0.0760162	293	0.0853848	0.0774348
294	0.0775242	0.0737631	294	0.0815928	0.0757885	294	0.0849485	0.0763452
295	0.0774539	0.0737977	295	0.0816381	0.0761521	295	0.0850499	0.0767231
296	0.0775421	0.0738132	296	0.0818384	0.07599	296	0.0849009	0.0768828
297	0.077641	0.0738466	297	0.0816917	0.0761485	297	0.0851321	0.0771189
298	0.077728	0.0737989	298	0.0818825	0.0758135	298	0.0851023	0.0756586
299	0.0777769	0.0737905	299	0.0817454	0.0760412	299	0.08479	0.0764418
300	0.0777614	0.073868	300	0.0818992	0.0755131	300	0.0850165	0.0767076
301	0.0776923	0.0738084	301	0.0819731	0.0763047	301	0.085063	0.0756574
302	0.0776601	0.0737584	302	0.0818145	0.0762141	302	0.0848746	0.0769961
303	0.0777161	0.0737905	303	0.0818455	0.0758219	303	0.0851071	0.0759983
304	0.077728	0.0738811	304	0.0817776	0.0761247	304	0.0851226	0.0769329
305	0.0777233	0.0738716	305	0.0817585	0.0758123	305	0.0849926	0.0764728
306	0.077889	0.0738192	306	0.0819302	0.0761449	306	0.0849569	0.0765598
307	0.077976	0.0738668	307	0.0817931	0.0763047	307	0.0846994	0.0761962
308	0.0779915	0.0738192	308	0.0819159	0.0762153	308	0.0845456	0.0763321
309	0.0781131	0.0738978	309	0.0818622	0.0758195	309	0.0847852	0.0765824
310	0.0781846	0.0739503	310	0.0817442	0.0760877	310	0.0852168	0.0766766
311	0.0780523	0.0739026	311	0.0815654	0.0755107	311	0.0851822	0.0768483
312	0.0781655	0.0739419	312	0.0811553	0.0756943	312	0.0849211	0.0763583
313	0.0781035	0.074029	313	0.0812387	0.0754321	313	0.0850475	0.0761724
314	0.078131	0.0740743	314	0.0814116	0.0752044	314	0.0849783	0.0764823
315	0.0782061	0.0740433	315	0.0815821	0.0752532	315	0.0850832	0.0764823
316	0.0782132	0.0739992	316	0.0813568	0.0754523	316	0.0850797	0.0771153
317	0.0782907	0.0740325	317	0.0814271	0.0751281	317	0.0854135	0.0744176
318	0.0783372	0.0741518	318	0.0817573	0.0756967	318	0.0850368	0.0760889
319	0.0784063	0.0741637	319	0.0821161	0.0752866	319	0.0855446	0.0764132
320	0.0783324	0.0742471	320	0.0824463	0.0749385	320	0.0854492	0.0749528
321	0.0775278	0.073694	321	0.0818181	0.0755	321	0.0853932	0.0765789
322	0.0776494	0.0736272	322	0.0820041	0.0757897	322	0.0853848	0.0766551
323	0.0779486	0.0736451	323	0.0820518	0.0752175	323	0.0856531	0.0770938
324	0.0781155	0.0736868	324	0.0819755	0.0754094	324	0.0852621	0.0767279
325	0.0781596	0.0736499	325	0.0818992	0.0758469	325	0.0852239	0.0768185
326	0.0781155	0.0736368	326	0.0819373	0.0757134	326	0.0852537	0.0774157
327	0.0779295	0.0736403	327	0.081917	0.0760841	327	0.0850892	0.0771165
328	0.0778747	0.073508	328	0.0820506	0.0760543	328	0.0850534	0.0770485
329	0.077765	0.073539	329	0.0820696	0.0764859	329	0.0853038	0.077281
330	0.0775957	0.0736439	330	0.081954	0.0757265	330	0.0856304	0.0773776
331	0.0774479	0.0736821	331	0.0819898	0.0754869	331	0.085597	0.0763381
332	0.0774562	0.0736213	332	0.0820482	0.0759757	332	0.0852585	0.0768864
333	0.077436	0.0735366	333	0.0821245	0.0759411	333	0.0853121	0.0769186
334	0.0774074	0.0736284	334	0.0821757	0.0759339	334	0.0852954	0.0769985
335	0.0774097	0.0735962	335	0.0821042	0.0756073	335	0.0849795	0.0759614
336	0.0774205	0.0735319	336	0.0819719	0.0758016	336	0.0851226	0.0765681
337	0.0774455	0.0736201	337	0.0819218	0.0757575	337	0.0851393	0.0768101
338	0.0774336	0.0737441	338	0.0817943	0.0757372	338	0.0850523	0.0771475
339	0.077368	0.0736785	339	0.0819469	0.0760293	339	0.0852096	0.0773489
340	0.0772989	0.0737298	340	0.0821877	0.0754273	340	0.0848627	0.0769436
341	0.0773919	0.0737011	341	0.0817323	0.0761569	341	0.0852144	0.0773847
342	0.0775361	0.0737441	342	0.0816655	0.0753236	342	0.0856173	0.0765145
343	0.0776446	0.0737393	343	0.0817823	0.075897	343	0.0854194	0.0767612
344	0.0776279	0.073756	344	0.0819337	0.0757039	344	0.0854385	0.0764108
345	0.0776243	0.0737441	345	0.0820184	0.0759172	345	0.0852811	0.0769067
346	0.0776339	0.0737619	346	0.0816667	0.0757372	346	0.0855005	0.0774491
347	0.0776827	0.0737143	347	0.0818419	0.0756252	347	0.085268	0.0761473
348	0.0777221	0.0737834	348	0.0816369	0.0761759	348	0.085429	0.0768673
349	0.0777626	0.0737226	349	0.0814092	0.0751269	349	0.0853312	0.0776052
350	0.0777209	0.0738168	350	0.0816214	0.0756824	350	0.0852931	0.0767136
351	0.0777352	0.0738549	351	0.0817513	0.0762236	351	0.0855744	0.0768208
352	0.0776947	0.0738847	352	0.0816143	0.0758469	352	0.0857472	0.0774086
353	0.0776267	0.0738657	353	0.0817716	0.0754011	353	0.0853562	0.077976
354	0.0775445	0.0738001	354	0.0813913	0.0758934	354	0.0850606	0.0761831
355	0.07761	0.0738454	355	0.0814033	0.0754189	355	0.0851882	0.0769198
356	0.0775826	0.0738192	356	0.0815535	0.0756407	356	0.0853384	0.0768805
357	0.07761	0.0738251	357	0.0816453	0.0760722	357	0.0852644	0.077436
358	0.0775886	0.0738072	358	0.0816739	0.0759387	358	0.0849068	0.0762129
359	0.0775051	0.0737584	359	0.0816906	0.0762177	359	0.0850201	0.076623
360	0.0775981	0.0738204	360	0.0818467	0.0759542	360	0.0848627	0.0768971
361	0.07761	0.0738096	361	0.0817859	0.0760758	361	0.0850201	0.0772071
362	0.0777102	0.073719	362	0.0819921	0.0758934	362	0.085026	0.0757027
363	0.0777125	0.0737453	363	0.0818586	0.0761044	363	0.0848591	0.0764465
364	0.0777543	0.0737751	364	0.08201	0.0754738	364	0.0850224	0.0768125
365	0.0777042	0.073812	365	0.0819206	0.0763059	365	0.0851476	0.0757039
366	0.077697	0.0737643	366	0.0819039	0.0760436	366	0.0849116	0.0770116
367	0.0777507	0.0738096	367	0.081954	0.0757384	367	0.0850832	0.075978
368	0.0777245	0.0739026	368	0.0819004	0.0762308	368	0.0850999	0.0768995
369	0.0777078	0.0738561	369	0.0818717	0.0759625	369	0.0849462	0.0764406
370	0.0778508	0.0737965	370	0.0819123	0.0762033	370	0.0848889	0.0765419
371	0.0778985	0.0737989	371	0.0818348	0.0763309	371	0.0846851	0.0763476
372	0.0778818	0.0737846	372	0.0818646	0.0763583	372	0.0846386	0.0764465
373	0.0779951	0.0738537	373	0.0816655	0.0757992	373	0.0849414	0.0766098
374	0.0781059	0.0738966	374	0.0815034	0.0760293	374	0.0852585	0.076704
375	0.0780773	0.0738692	375	0.081346	0.0752842	375	0.0851619	0.0767493
376	0.0781083	0.073992	376	0.0809586	0.0756383	376	0.0849199	0.0763059
377	0.078094	0.0740445	377	0.0813687	0.0754595	377	0.0849974	0.0761652
378	0.0780272	0.0740159	378	0.0814545	0.0752223	378	0.084933	0.0764692
379	0.0781238	0.0739658	379	0.0814843	0.075171	379	0.0852299	0.0764644
380	0.0781298	0.0739825	380	0.0813448	0.0754786	380	0.0851786	0.0771499
381	0.0781941	0.0740719	381	0.0817347	0.0752783	381	0.0853479	0.0745285
382	0.0782275	0.0742006	382	0.0818622	0.0757658	382	0.0851679	0.0761592
383	0.0783634	0.0742042	383	0.0821722	0.0752795	383	0.0856447	0.0763094
384	0.078243	0.0742745	384	0.0826156	0.0749135	384	0.085516	0.0748646
385	0.0774741	0.0737429	385	0.08178	0.0755405	385	0.0853229	0.0767457
386	0.0775874	0.0737083	386	0.0820124	0.0757802	386	0.0854015	0.0766563
387	0.0779831	0.0736964	387	0.0821161	0.0753462	387	0.0855613	0.0769818
388	0.0781524	0.0737214	388	0.0819683	0.0754154	388	0.0854361	0.0766039
389	0.0782323	0.0736165	389	0.0818908	0.0758624	389	0.0852692	0.0768709
390	0.0781846	0.0736141	390	0.0820076	0.0757802	390	0.0851834	0.0774026
391	0.0779736	0.0735795	391	0.0820696	0.0760591	391	0.0851274	0.0771761
392	0.0778294	0.0734937	392	0.0821352	0.0761104	392	0.0850964	0.0769424
393	0.077759	0.0735366	393	0.0820184	0.0764918	393	0.0853276	0.0772309
394	0.0776136	0.0736284	394	0.0819469	0.0756717	394	0.0856709	0.0774777
395	0.0774837	0.0736248	395	0.0820649	0.0754678	395	0.0855887	0.0763798
396	0.0775015	0.0735939	396	0.0821412	0.075953	396	0.0852454	0.0769281
397	0.0774264	0.0735438	397	0.082202	0.0759232	397	0.0852203	0.076977
398	0.0773871	0.0736308	398	0.0822604	0.0759113	398	0.0854027	0.0768709
399	0.0774324	0.0736392	399	0.0821829	0.0756252	399	0.0849843	0.0759614
400	0.0773871	0.0736105	400	0.0819778	0.0758457	400	0.0850928	0.0766289
401	0.0774455	0.0737	401	0.0818503	0.075742	401	0.0850713	0.0767696
402	0.0774503	0.0737476	402	0.0818288	0.0756979	402	0.0849617	0.0770581
403	0.0774729	0.0736701	403	0.0820017	0.0759876	403	0.0851858	0.0772214
404	0.0773668	0.073756	404	0.0821292	0.0754845	404	0.0851023	0.0769639
405	0.0774264	0.0737047	405	0.0817394	0.0761485	405	0.0852609	0.0774324
406	0.0775445	0.0737607	406	0.0817668	0.0753915	406	0.0855398	0.0766337
407	0.0776863	0.0738323	407	0.0818253	0.076077	407	0.0854361	0.0767791
408	0.077697	0.0738049	408	0.0819957	0.0757098	408	0.0852609	0.0763631
409	0.0776684	0.0737655	409	0.0819802	0.0759161	409	0.0852537	0.0767732
410	0.0776434	0.0737429	410	0.0817096	0.0758433	410	0.0853896	0.0772667
411	0.0776839	0.0736988	411	0.081805	0.0757456	411	0.0853121	0.0762081
412	0.0776827	0.073781	412	0.0816476	0.076319	412	0.0852942	0.0768304
413	0.0777483	0.073781	413	0.0814581	0.0752628	413	0.0853443	0.0775897
414	0.0777507	0.0738418	414	0.0816941	0.0755942	414	0.0852776	0.0766766
415	0.077765	0.0738716	415	0.0817168	0.0762236	415	0.0854862	0.0766838
416	0.0777364	0.0738835	416	0.0816166	0.0759053	416	0.0856841	0.0774574
417	0.077703	0.0738871	417	0.0816607	0.0754488	417	0.0852847	0.0779641
418	0.0775778	0.073812	418	0.0813413	0.0760579	418	0.0850749	0.0762737
419	0.0776482	0.0737953	419	0.0814164	0.0755382	419	0.0851738	0.0768566
420	0.0776136	0.073806	420	0.0815988	0.0757694	420	0.0852108	0.0768197
421	0.0776613	0.0738204	421	0.0816834	0.0761116	421	0.0851655	0.0773668
422	0.0775921	0.0738192	422	0.0817406	0.0759649	422	0.0848758	0.0762141
423	0.077548	0.0737643	423	0.081811	0.0763166	423	0.084914	0.0766373
424	0.0776279	0.0737643	424	0.0819242	0.0760746	424	0.0848663	0.0769436
425	0.077647	0.073725	425	0.0818861	0.0759983	425	0.0849617	0.0772035
426	0.0776637	0.0736856	426	0.0820601	0.075798	426	0.0850987	0.0755453
427	0.0777102	0.0737739	427	0.0819385	0.0761962	427	0.0849545	0.0763917
428	0.0777102	0.0737894	428	0.0819552	0.0755107	428	0.0850928	0.0770354
429	0.0776899	0.0738347	429	0.082047	0.0762165	429	0.0851178	0.075686
430	0.077734	0.0738657	430	0.0820255	0.075959	430	0.0849628	0.0771129
431	0.0778198	0.0738835	431	0.0821185	0.0756764	431	0.0850511	0.0759494
432	0.0777614	0.0738668	432	0.0820148	0.0762236	432	0.0849962	0.076983
433	0.0777185	0.0738657	433	0.0818694	0.0761127	433	0.0849652	0.0764322
434	0.0777972	0.0738263	434	0.0818217	0.0762653	434	0.0848866	0.0766158
435	0.0778306	0.0737798	435	0.0818384	0.0762737	435	0.0848436	0.0763178
436	0.0778437	0.0737607	436	0.0817299	0.0763726	436	0.0847888	0.0765312
437	0.0779295	0.0737655	437	0.0814641	0.0758445	437	0.0850332	0.0765598
438	0.0779748	0.073868	438	0.0812864	0.0759697	438	0.0851965	0.076741
439	0.0780427	0.0738752	439	0.081203	0.0751567	439	0.0850439	0.0767267
440	0.0780511	0.0739658	440	0.0808728	0.075686	440	0.0848866	0.0762475
441	0.0780714	0.0740266	441	0.0814521	0.075388	441	0.0849509	0.0761592
442	0.0780606	0.0739872	442	0.0814259	0.0751805	442	0.085007	0.0765216
443	0.078063	0.0740063	443	0.0814199	0.0750518	443	0.0852752	0.0764
444	0.078032	0.0740468	444	0.0814307	0.0754917	444	0.0852501	0.0771523
445	0.0781417	0.0741696	445	0.081948	0.0753248	445	0.0853264	0.0744832
446	0.0781727	0.0742495	446	0.081923	0.075767	446	0.0852787	0.0761509
447	0.0782359	0.0741959	447	0.0822353	0.0752175	447	0.0856471	0.0762105
448	0.0781918	0.0742757	448	0.0827336	0.0749481	448	0.0855124	0.0747573
449	0.0773931	0.0737572	449	0.0818157	0.0755894	449	0.0853074	0.0769043
450	0.0775731	0.0737464	450	0.0819051	0.0758123	450	0.0853658	0.0766742
451	0.077945	0.073688	451	0.0821507	0.0753295	451	0.0855684	0.076983
452	0.0782037	0.0736916	452	0.0819957	0.0754774	452	0.0855112	0.0764406
453	0.0782335	0.0736761	453	0.0819314	0.0759625	453	0.0852013	0.0769436
454	0.0781822	0.0736213	454	0.0820887	0.0758803	454	0.085156	0.0774264
455	0.0779963	0.0735867	455	0.0822008	0.076015	455	0.0851965	0.0772941
456	0.0779212	0.0735009	456	0.0821424	0.0760925	456	0.0850964	0.0768924
457	0.0777352	0.0734901	457	0.0819981	0.0764501	457	0.0853908	0.0771487
458	0.0776172	0.0736058	458	0.0821042	0.0757539	458	0.0856066	0.077548
459	0.0775135	0.073576	459	0.0821495	0.075407	459	0.0855052	0.076282
460	0.0775313	0.0735819	460	0.0822961	0.0758886	460	0.0852072	0.0768495
461	0.0774586	0.0735307	461	0.0822532	0.0759196	461	0.0852728	0.0769937
462	0.0773919	0.0736451	462	0.0821579	0.0759053	462	0.0854898	0.0767159
463	0.077467	0.0736558	463	0.0820971	0.0756311	463	0.0850892	0.0759697
464	0.0773561	0.0736022	464	0.0819588	0.0759375	464	0.0851154	0.076685
465	0.077424	0.0736594	465	0.0818157	0.0757504	465	0.0850284	0.0767708
466	0.0774825	0.0737298	466	0.0819218	0.0757098	466	0.0849354	0.0770295
467	0.0775075	0.0736618	467	0.081898	0.0759256	467	0.0852084	0.077188
468	0.0774598	0.0737596	468	0.0820303	0.0755239	468	0.0853014	0.0769508
469	0.0775206	0.0737357	469	0.0817597	0.0761819	469	0.0852406	0.0773311
470	0.0776219	0.0738299	470	0.0818574	0.0755453	470	0.0854087	0.076735
471	0.0776732	0.0737846	471	0.0818968	0.0760531	471	0.0854027	0.0769627
472	0.0777209	0.0737548	472	0.0820327	0.0756264	472	0.0851786	0.0763547
473	0.0777566	0.0737417	473	0.0819349	0.0758743	473	0.0852776	0.076673
474	0.0777483	0.0737488	474	0.081749	0.0758863	474	0.0851786	0.0770903
475	0.0777304	0.0737345	475	0.081768	0.0758183	475	0.0851989	0.0762415
476	0.0776494	0.0737798	476	0.0816143	0.0763082	476	0.0852311	0.0769639
477	0.0777113	0.0738025	477	0.0815892	0.0754297	477	0.0852978	0.0775826
478	0.077759	0.0738668	478	0.0818205	0.0755644	478	0.0851977	0.0766766
479	0.0777471	0.0738192	479	0.0817442	0.0762594	479	0.0854325	0.0766039
480	0.0777757	0.0738811	480	0.0815928	0.0758374	480	0.0856423	0.0773132
481	0.0777602	0.0738454	481	0.0815845	0.075525	481	0.0852418	0.0779593
482	0.0776219	0.073806	482	0.0814462	0.0762224	482	0.0850797	0.0763452
483	0.0776935	0.0737524	483	0.0815105	0.0756347	483	0.0852335	0.0769377
484	0.0777018	0.0737941	484	0.0816917	0.0757658	484	0.0851965	0.0766253
485	0.0776577	0.0737917	485	0.0817966	0.0761271	485	0.0851023	0.0772393
486	0.0775588	0.0738144	486	0.0818336	0.0761557	486	0.0847888	0.0762296
487	0.0775945	0.0737262	487	0.0818622	0.0763392	487	0.0849271	0.0767338
488	0.0776017	0.0736499	488	0.081985	0.0762618	488	0.0849509	0.0771248
489	0.0776625	0.0736511	489	0.0819957	0.0760365	489	0.0849462	0.0772297
490	0.0776386	0.0737178	490	0.0820875	0.0756276	490	0.0851595	0.07563
491	0.0776792	0.0737774	491	0.0818563	0.0760829	491	0.0850189	0.076437
492	0.0777066	0.0738728	492	0.0819898	0.075562	492	0.0851631	0.0771058
493	0.0776899	0.0738811	493	0.0822222	0.0761652	493	0.0849926	0.0756907
494	0.0777543	0.073899	494	0.082283	0.0759315	494	0.085063	0.0771391
495	0.0778103	0.0738978	495	0.0821817	0.0756836	495	0.085032	0.0760102
496	0.0778532	0.073899	496	0.0820482	0.0762105	496	0.084939	0.0770879
497	0.077728	0.0739026	497	0.0818694	0.0761151	497	0.0849688	0.0764823
498	0.0777745	0.073868	498	0.0818515	0.0763452	498	0.0849831	0.0767326
499	0.077759	0.073806	499	0.0817835	0.0762415	499	0.0849438	0.0762963
500	0.0778484	0.0737834	500	0.0815594	0.0763452	500	0.0848448	0.0766587
501	0.0779009	0.0738323	501	0.0812292	0.0758576	501	0.0849569	0.0765669
502	0.0779319	0.0739157	502	0.0811219	0.0759435	502	0.0850546	0.0767767
503	0.0779283	0.0738466	503	0.0811064	0.0751579	503	0.084902	0.0767457
504	0.0780201	0.0739121	504	0.0808442	0.0757229	504	0.0848591	0.0762606
505	0.0780916	0.0739145	505	0.0814664	0.0752234	505	0.0850034	0.076251
506	0.0781047	0.074048	506	0.0813687	0.0751245	506	0.0850356	0.0765336
507	0.0780571	0.0740147	507	0.0814545	0.0750685	507	0.0852835	0.0762928
508	0.0779283	0.0741196	508	0.0815034	0.0755191	508	0.0853646	0.0770807
509	0.0780416	0.0742328	509	0.0820196	0.0753665	509	0.0852454	0.0744665
510	0.0781298	0.0742602	510	0.081979	0.0757265	510	0.0853133	0.0760496
511	0.0781	0.0742042	511	0.0822341	0.0752246	511	0.0854981	0.0761652
512	0.0781107	0.0742495	512	0.0827348	0.0749552	512	0.0854886	0.0746834
513	0.0774288	0.0737834	513	0.0818181	0.0755942	513	0.0853312	0.0769484
514	0.0775599	0.0738001	514	0.0818431	0.07586	514	0.085398	0.0767779
515	0.0779462	0.0736535	515	0.0820792	0.0752759	515	0.0855052	0.0770283
516	0.0781977	0.0736392	516	0.0820112	0.0755286	516	0.0854695	0.0763774
517	0.0781953	0.0736284	517	0.0820339	0.0760019	517	0.0851965	0.076946
518	0.0781894	0.0735712	518	0.0821698	0.0760162	518	0.0852537	0.0774467
519	0.0780475	0.0736201	519	0.0822413	0.0760126	519	0.0851452	0.0774014
520	0.0779355	0.0735152	520	0.0821137	0.0760245	520	0.0851142	0.0768793
521	0.0776911	0.0734246	521	0.0819802	0.0763285	521	0.0853109	0.077101
522	0.0775516	0.0734735	522	0.0822949	0.0758564	522	0.0854981	0.077548
523	0.0774539	0.0735605	523	0.0822294	0.075475	523	0.0853455	0.0762606
524	0.077498	0.0735557	524	0.0823057	0.0758886	524	0.0852132	0.0767577
525	0.0775027	0.0735295	525	0.0821829	0.0759506	525	0.0852871	0.0771308
526	0.0774515	0.0736392	526	0.082016	0.0759566	526	0.085609	0.0765872
527	0.0774777	0.073657	527	0.0819325	0.075624	527	0.0850821	0.0759709
528	0.0773847	0.0735879	528	0.0820541	0.076102	528	0.0851548	0.0767696
529	0.0774002	0.0735974	529	0.08183	0.075773	529	0.0851703	0.0767934
530	0.0775194	0.0736463	530	0.0820088	0.0757718	530	0.0850391	0.0770032
531	0.0775421	0.0736773	531	0.0818884	0.0759315	531	0.0851715	0.0772166
532	0.077548	0.0737524	532	0.0820839	0.075537	532	0.0853109	0.0769043
533	0.0775897	0.0738084	533	0.081867	0.0761747	533	0.0851762	0.0772059
534	0.0776684	0.0737798	534	0.0819016	0.0757456	534	0.0852609	0.0766909
535	0.0777137	0.0737453	535	0.0819278	0.0760162	535	0.0853753	0.0769532
536	0.0776803	0.0736761	536	0.0820053	0.0755727	536	0.0850916	0.0763261
537	0.0777817	0.0737166	537	0.0818717	0.0757897	537	0.0852036	0.0766242
538	0.0778306	0.0737059	538	0.0817525	0.0759256	538	0.0849521	0.0769699
539	0.0778413	0.0738001	539	0.0818169	0.0758719	539	0.085088	0.07622
540	0.0777066	0.0737822	540	0.0817251	0.0762904	540	0.0852382	0.076946
541	0.0776923	0.073781	541	0.0817239	0.0756776	541	0.0852454	0.0775468
542	0.0777209	0.0738525	542	0.0818002	0.075655	542	0.0851393	0.0767684
543	0.0776935	0.0738132	543	0.0816858	0.076313	543	0.0853086	0.0763857
544	0.0777364	0.0738525	544	0.0815666	0.0757802	544	0.0855446	0.0772607
545	0.0777364	0.0737739	545	0.0816631	0.0755382	545	0.0851738	0.0778675
546	0.0776589	0.0737774	546	0.0816524	0.0763106	546	0.0850713	0.0763786
547	0.0777304	0.0737333	547	0.0815809	0.0758719	547	0.085237	0.0769639
548	0.0777686	0.0738096	548	0.0818241	0.0757587	548	0.0850892	0.0766158
549	0.077678	0.073787	549	0.0818813	0.0760984	549	0.084964	0.077107
550	0.0776136	0.0737751	550	0.0818515	0.0761247	550	0.0847983	0.0762379
551	0.0775981	0.0736558	551	0.0818253	0.0762725	551	0.0849974	0.0767481
552	0.0775921	0.0735342	552	0.0820982	0.0763464	552	0.0850248	0.0773442
553	0.0775647	0.0736403	553	0.0820649	0.0760627	553	0.0850534	0.077467
554	0.0776589	0.0737739	554	0.0820196	0.0756657	554	0.0852203	0.0755787
555	0.0776434	0.0737989	555	0.0818658	0.0760055	555	0.085063	0.0764596
556	0.0776935	0.0738823	556	0.0821161	0.0755334	556	0.0851631	0.0770843
557	0.0776982	0.0739264	557	0.0823617	0.07617	557	0.0849128	0.0756359
558	0.0777543	0.0739372	558	0.0823843	0.0759852	558	0.0850475	0.0771797
559	0.0777841	0.0738657	559	0.0821114	0.0758111	559	0.0850165	0.0760603
560	0.0778353	0.0738573	560	0.0820613	0.0761354	560	0.084945	0.0770867
561	0.0777626	0.073911	561	0.0818133	0.076015	561	0.0850868	0.076524
562	0.0777709	0.0738847	562	0.0818503	0.0764155	562	0.0849974	0.0768197
563	0.0777578	0.0738883	563	0.0816667	0.0762999	563	0.0848925	0.0761831
564	0.0778413	0.0738609	564	0.0813317	0.0762999	564	0.0848448	0.0766444
565	0.0778937	0.0738597	565	0.0811744	0.075829	565	0.0849152	0.0764763
566	0.0778973	0.0738943	566	0.0810063	0.0759768	566	0.0849271	0.0767159
567	0.0779295	0.073818	567	0.0810182	0.0752532	567	0.084902	0.0767791
568	0.0779641	0.0739002	568	0.0810122	0.0756717	568	0.0849891	0.076369
569	0.0780702	0.0739312	569	0.0814426	0.07532	569	0.0850081	0.0764942
570	0.0780714	0.0740755	570	0.0813758	0.0750625	570	0.0850785	0.0765717
571	0.078119	0.07411	571	0.0814807	0.0751281	571	0.0852513	0.0762379
572	0.0779057	0.0741637	572	0.0815904	0.0756872	572	0.0854266	0.077076
573	0.0780499	0.0742519	573	0.0820541	0.0753629	573	0.0851095	0.0746489
574	0.0780106	0.0742722	574	0.0820947	0.0757289	574	0.0852954	0.0759792
575	0.0779891	0.0741935	575	0.0822234	0.0752282	575	0.0853515	0.0761664
576	0.0780058	0.0742102	576	0.0826752	0.0750673	576	0.0854862	0.0745738
577	0.0774014	0.0737858	577	0.0818527	0.075649	577	0.085299	0.0769114
578	0.0775981	0.0737655	578	0.0819528	0.0758815	578	0.0853634	0.0768554
579	0.0779104	0.0736356	579	0.0820434	0.0752032	579	0.0853527	0.0771296
580	0.0781667	0.0736773	580	0.0821257	0.0755322	580	0.0853932	0.0764
581	0.0781882	0.0735641	581	0.0820994	0.075959	581	0.0852299	0.076921
582	0.0781858	0.073607	582	0.082221	0.0760973	582	0.0853038	0.0773895
583	0.0780272	0.0736463	583	0.0822544	0.0760567	583	0.0852132	0.0774825
584	0.0778878	0.0734818	584	0.0822127	0.0759387	584	0.0851166	0.0769079
585	0.0776863	0.0734198	585	0.0820971	0.0762844	585	0.0852633	0.0770295
586	0.077517	0.0734389	586	0.0822914	0.0758982	586	0.0854039	0.0775266
587	0.077492	0.0735199	587	0.0823188	0.0754869	587	0.085305	0.0763988
588	0.0774789	0.0735307	588	0.0821722	0.0758338	588	0.0852895	0.0766182
589	0.0774777	0.0735605	589	0.082072	0.0758767	589	0.0852108	0.0770938
590	0.0775099	0.0736403	590	0.0818741	0.0760543	590	0.0856149	0.0767672
591	0.0775075	0.0736535	591	0.0819588	0.07563	591	0.0851011	0.0759721
592	0.0774086	0.0735533	592	0.0821269	0.0761414	592	0.0853515	0.0768423
593	0.0774872	0.0735438	593	0.0818849	0.0758231	593	0.0853133	0.076766
594	0.077585	0.0735962	594	0.0820661	0.0759053	594	0.0851464	0.0770688
595	0.0776398	0.0737298	595	0.0818276	0.0759995	595	0.0849915	0.0772238
596	0.0775945	0.0737262	596	0.082159	0.0755978	596	0.0852537	0.0768542
597	0.077635	0.0737584	597	0.0819314	0.0760984	597	0.085181	0.0771177
598	0.0777006	0.0737011	598	0.0820172	0.0756979	598	0.0851071	0.076617
599	0.0777614	0.0737262	599	0.0820255	0.0760341	599	0.0853217	0.0768387
600	0.0777102	0.073663	600	0.0819099	0.0755739	600	0.0850177	0.0764298
601	0.0778508	0.0737309	601	0.0817251	0.0756824	601	0.0851226	0.0766814
602	0.0778759	0.0737166	602	0.0816834	0.075984	602	0.0848901	0.0769591
603	0.0778842	0.0737894	603	0.0818658	0.0759053	603	0.084995	0.0762701
604	0.0778127	0.073756	604	0.0818193	0.0762582	604	0.0852513	0.0768328
605	0.0777137	0.0737393	605	0.0817239	0.0758183	605	0.085187	0.0774217
606	0.077666	0.0738037	606	0.0817406	0.0757003	606	0.0850213	0.0769305
607	0.077647	0.0736988	607	0.0816607	0.0763512	607	0.0851464	0.0762498
608	0.077703	0.0737703	608	0.0816703	0.0757384	608	0.085448	0.0771725
609	0.0776935	0.0736642	609	0.0818169	0.0755131	609	0.0851798	0.0777674
610	0.0776827	0.0737381	610	0.0818455	0.0763047	610	0.0851595	0.0764072
611	0.0777519	0.0737226	611	0.0817537	0.0760937	611	0.0853086	0.076977
612	0.0777829	0.0737703	612	0.0818443	0.075866	612	0.0850666	0.0765324
613	0.0777423	0.0737	613	0.0819492	0.0761068	613	0.084945	0.0771403
614	0.0776577	0.0736701	614	0.0819314	0.0760639	614	0.0849676	0.0763631
615	0.0775802	0.0736392	615	0.0819039	0.0762355	615	0.0850534	0.0767756
616	0.0775135	0.073576	616	0.0821579	0.0763214	616	0.0850666	0.0773811
617	0.0774932	0.0736535	617	0.0820291	0.0761163	617	0.0851607	0.0776517
618	0.0776398	0.073781	618	0.0819612	0.0757647	618	0.0853419	0.0758624
619	0.0776482	0.0738573	619	0.0820136	0.0758851	619	0.0850332	0.0763845
620	0.0776851	0.0739169	620	0.0822568	0.0754845	620	0.0851095	0.0770473
621	0.0777876	0.073961	621	0.0824213	0.076071	621	0.0848746	0.0756896
622	0.0777709	0.0739515	622	0.0821924	0.0760734	622	0.0851679	0.0771284
623	0.0777519	0.0739419	623	0.0820208	0.0758755	623	0.0850403	0.0762188
624	0.077821	0.0738764	624	0.081985	0.0760889	624	0.0850046	0.0771666
625	0.0777709	0.0739264	625	0.0818372	0.0760412	625	0.0851583	0.0765896
626	0.0777602	0.0739741	626	0.081892	0.0763536	626	0.085001	0.0769854
627	0.077728	0.0739431	627	0.0815642	0.0763392	627	0.0847769	0.0761211
628	0.0778258	0.0739574	628	0.0812066	0.0762582	628	0.0848281	0.0768268
629	0.0779033	0.0738645	629	0.0810981	0.0757253	629	0.0848877	0.0764024
630	0.0779235	0.0738275	630	0.0808299	0.07604	630	0.084933	0.0766647
631	0.0779676	0.0738025	631	0.0810206	0.0753796	631	0.0849438	0.0768447
632	0.0779665	0.0739431	632	0.0812554	0.0757301	632	0.0850308	0.0763226
633	0.0780237	0.0740039	633	0.0813699	0.0754821	633	0.0850308	0.076685
634	0.0780833	0.0741255	634	0.0814998	0.0751019	634	0.0850892	0.0766277
635	0.0781405	0.0741744	635	0.0815022	0.0751662	635	0.0852215	0.0762522
636	0.0779927	0.0742233	636	0.0816524	0.0757396	636	0.085392	0.0771105
637	0.0780439	0.0743043	637	0.0821137	0.0753713	637	0.0849843	0.0747168
638	0.0779319	0.0743353	638	0.0822282	0.0757062	638	0.0852215	0.0759065
639	0.0779259	0.074209	639	0.082202	0.0751209	639	0.0852561	0.0761938
640	0.0779724	0.074271	640	0.0825119	0.0751352	640	0.0855184	0.074389
641	0.0773656	0.0737655	641	0.0819385	0.0758088	641	0.0852799	0.0768375
642	0.077585	0.073725	642	0.0820243	0.0760531	642	0.0852406	0.0769234
643	0.0779188	0.0736308	643	0.082159	0.0751567	643	0.0852191	0.077244
644	0.0781047	0.0736523	644	0.082196	0.0755823	644	0.0853741	0.0765467
645	0.0781488	0.0735557	645	0.0822353	0.0758779	645	0.0851917	0.0769067
646	0.0780761	0.0736284	646	0.0821698	0.0762045	646	0.0852609	0.0773621
647	0.0779831	0.0735641	647	0.082233	0.0761437	647	0.085206	0.0773442
648	0.0778306	0.0734305	648	0.0822866	0.0759208	648	0.08515	0.0768745
649	0.0776696	0.0733447	649	0.0821841	0.0763416	649	0.0852728	0.0769806
650	0.077517	0.0734186	650	0.0823379	0.0758529	650	0.085367	0.0776052
651	0.0775146	0.0735199	651	0.0822186	0.0754023	651	0.0852525	0.076375
652	0.0774586	0.0735295	652	0.0820494	0.0758052	652	0.0853145	0.0765204
653	0.077424	0.0735891	653	0.0819647	0.0758791	653	0.0852013	0.0769424
654	0.0775468	0.0736451	654	0.0818622	0.0759888	654	0.085566	0.0770271
655	0.0776041	0.0736105	655	0.0820136	0.0755489	655	0.0851774	0.0759482
656	0.0775099	0.0735152	656	0.0820553	0.0761044	656	0.0854826	0.0768793
657	0.0775516	0.0735164	657	0.0818849	0.0759029	657	0.085336	0.0769329
658	0.0775886	0.0735629	658	0.0821042	0.0759435	658	0.0851202	0.0770724
659	0.0776374	0.0737548	659	0.08178	0.0760996	659	0.0849581	0.0772095
660	0.077641	0.0737429	660	0.0821543	0.0756896	660	0.085237	0.0768745
661	0.077678	0.0736499	661	0.0819612	0.0760448	661	0.0851619	0.0771701
662	0.077697	0.0736356	662	0.0820982	0.075618	662	0.0850415	0.0765753
663	0.0778079	0.0736809	663	0.0820684	0.0760376	663	0.0852358	0.0767696
664	0.077765	0.0736928	664	0.0818872	0.0756192	664	0.0849283	0.076468
665	0.0779009	0.0737107	665	0.0817454	0.0756514	665	0.0850868	0.0765669
666	0.0778341	0.0737047	666	0.0817132	0.0760317	666	0.0849712	0.0770414
667	0.0778604	0.0737369	667	0.0818634	0.0759196	667	0.0849271	0.0762987
668	0.0778973	0.0737464	668	0.0818706	0.0762117	668	0.0853288	0.0768137
669	0.0777805	0.0736642	669	0.0817394	0.0758457	669	0.0850987	0.0772667
670	0.0777352	0.0737119	670	0.0817311	0.0757408	670	0.0849938	0.076977
671	0.0776577	0.0736368	671	0.0816596	0.0764048	671	0.0850058	0.0760663
672	0.0776565	0.0737321	672	0.0817215	0.0758004	672	0.0853848	0.0770593
673	0.077697	0.073694	673	0.0819325	0.0756073	673	0.0851977	0.0776172
674	0.0776851	0.0737214	674	0.0819123	0.0761735	674	0.0851107	0.0763595
675	0.0777173	0.073694	675	0.0818729	0.0760949	675	0.0853515	0.07707
676	0.077734	0.0737059	676	0.0819409	0.0758564	676	0.0851226	0.0764453
677	0.0777578	0.073688	677	0.08201	0.076133	677	0.0849307	0.0771594
678	0.0776708	0.073669	678	0.0819337	0.0761628	678	0.0850558	0.0765276
679	0.0776422	0.073663	679	0.082016	0.0761914	679	0.0851285	0.0766587
680	0.0775301	0.0736666	680	0.0820911	0.0763643	680	0.0851285	0.0772369
681	0.0775373	0.0737441	681	0.0821674	0.0761604	681	0.0851166	0.0777137
682	0.0775874	0.0738108	682	0.0821209	0.0758398	682	0.0853837	0.0760949
683	0.0776279	0.0738704	683	0.0821042	0.075841	683	0.0849438	0.0763988
684	0.0777125	0.0739074	684	0.0822949	0.0754035	684	0.0851321	0.0769687
685	0.0777888	0.0739563	685	0.0823987	0.0760186	685	0.0849092	0.0756431
686	0.0778794	0.0739586	686	0.0820768	0.0760889	686	0.085144	0.0770152
687	0.0778866	0.0739825	687	0.0819027	0.0760019	687	0.0850737	0.0762105
688	0.0778615	0.073936	688	0.081929	0.0760567	688	0.0851297	0.0770974
689	0.0777328	0.0739598	689	0.0818574	0.075978	689	0.0851476	0.0766325
690	0.0777531	0.0740039	690	0.0817263	0.0762188	690	0.0849307	0.0770807
691	0.0776958	0.0740373	691	0.0813591	0.076375	691	0.0848114	0.0761533
692	0.0778234	0.0739634	692	0.0811768	0.0762331	692	0.0849259	0.0769293
693	0.0779378	0.073837	693	0.0810051	0.0757015	693	0.0848067	0.0763881
694	0.0779307	0.0738132	694	0.0807941	0.0760806	694	0.0849938	0.0766385
695	0.0779819	0.0738215	695	0.0811267	0.0754046	695	0.0849998	0.0768793
696	0.0780034	0.0739861	696	0.0815058	0.0757301	696	0.084995	0.0762892
697	0.0780165	0.0740969	697	0.0814724	0.0755298	697	0.0850427	0.0767696
698	0.0780857	0.0741804	698	0.0816345	0.0751734	698	0.0850475	0.0766242
699	0.0781333	0.0742257	699	0.0815761	0.0751889	699	0.0851631	0.0762725
700	0.0780034	0.0742447	700	0.0817633	0.0758004	700	0.0853455	0.0770605
701	0.0781167	0.0743246	701	0.0822055	0.0754321	701	0.0849736	0.0747752
702	0.07792	0.074358	702	0.0822926	0.0756907	702	0.0851667	0.0757778
703	0.077883	0.0743246	703	0.0821686	0.07496	703	0.0851214	0.0762856
704	0.0779247	0.0743699	704	0.0823927	0.0750971	704	0.0856102	0.0743031
705	0.0772858	0.073725	705	0.0820053	0.0759339	705	0.0853634	0.0766504
706	0.0775135	0.0737	706	0.0821137	0.076288	706	0.0852489	0.0769544
707	0.0778639	0.073669	707	0.0822818	0.0751245	707	0.085156	0.0772917
708	0.0780833	0.0736809	708	0.0822484	0.0755298	708	0.0854278	0.0766742
709	0.0780451	0.0736547	709	0.0823247	0.0758195	709	0.0851619	0.0768924
710	0.0780404	0.0735569	710	0.0822115	0.0762284	710	0.0853002	0.0774097
711	0.0779533	0.0735033	711	0.0822508	0.0761747	711	0.0851846	0.0772583
712	0.0777507	0.0734413	712	0.0822389	0.075835	712	0.0852072	0.076896
713	0.077647	0.0733924	713	0.0821793	0.0763595	713	0.0852489	0.0770557
714	0.0775492	0.073421	714	0.0823092	0.0757802	714	0.085448	0.0776792
715	0.0775576	0.0735307	715	0.0820076	0.0753057	715	0.0853264	0.0763702
716	0.0775003	0.0735724	716	0.0818324	0.0756824	716	0.0852728	0.0765312
717	0.0774467	0.0736034	717	0.0819111	0.0758827	717	0.0851738	0.0768661
718	0.0775397	0.0736189	718	0.0818181	0.0759721	718	0.0855148	0.0772119
719	0.0775778	0.0736177	719	0.0819409	0.0755572	719	0.0851798	0.0759494
720	0.0775909	0.0734997	720	0.081985	0.0761318	720	0.0853515	0.0768375
721	0.0776589	0.0735271	721	0.0818324	0.0757635	721	0.085218	0.0771236
722	0.0776124	0.0736022	722	0.0821662	0.0759244	722	0.0851142	0.0769126
723	0.0776696	0.0736499	723	0.0818467	0.0761461	723	0.0848818	0.0771224
724	0.0776613	0.0736618	724	0.082134	0.0757635	724	0.085206	0.0768089
725	0.0776505	0.0736046	725	0.0819695	0.0760126	725	0.0851691	0.0772953
726	0.0777471	0.0736439	726	0.0821328	0.0755632	726	0.0849557	0.0765347
727	0.0778615	0.0736439	727	0.0820339	0.0759709	727	0.0850058	0.076741
728	0.0778246	0.0737154	728	0.0818944	0.075717	728	0.0848258	0.0764632
729	0.0778794	0.0737441	729	0.081811	0.0757301	729	0.0851202	0.0763607
730	0.0778031	0.0736713	730	0.0817144	0.0761569	730	0.0850379	0.0770319
731	0.077796	0.073694	731	0.0819123	0.0759614	731	0.0848675	0.0763583
732	0.0778747	0.0737405	732	0.081836	0.0762963	732	0.0853086	0.0767446
733	0.0778151	0.0736105	733	0.0817227	0.0758922	733	0.0850534	0.077225
734	0.0777638	0.0736499	734	0.0818217	0.0757647	734	0.0849175	0.0770128
735	0.0777042	0.0736356	735	0.0817287	0.0764108	735	0.0848997	0.0760067
736	0.0776184	0.073781	736	0.0817215	0.0759506	736	0.0853312	0.0769198
737	0.0777018	0.0737011	737	0.0820971	0.0757682	737	0.0851321	0.0774634
738	0.0776494	0.0736928	738	0.0819147	0.0761366	738	0.0850308	0.076375
739	0.0776958	0.0736487	739	0.0818229	0.0761235	739	0.0852382	0.0770712
740	0.0777447	0.0735986	740	0.0819969	0.0759757	740	0.0852251	0.076437
741	0.0777185	0.0736618	741	0.0820506	0.0762975	741	0.0849187	0.0771224
742	0.0776446	0.0737011	742	0.0819266	0.0760543	742	0.0851536	0.0767457
743	0.0776064	0.0736785	743	0.0820935	0.0761735	743	0.0851202	0.0766671
744	0.0776207	0.0736976	744	0.0821388	0.0764799	744	0.0851285	0.0770581
745	0.077616	0.0737894	745	0.0823808	0.0762451	745	0.0850427	0.0777888
746	0.0776494	0.0737905	746	0.0822032	0.075891	746	0.0853717	0.0760758
747	0.0776219	0.0738108	747	0.0820839	0.0759387	747	0.0849295	0.0764179
748	0.077728	0.0739372	748	0.0822687	0.0755072	748	0.0851929	0.0770712
749	0.0777888	0.0739753	749	0.0821579	0.0759959	749	0.084964	0.0757158
750	0.077914	0.0739694	750	0.0819373	0.0760329	750	0.0851631	0.0768936
751	0.0779378	0.0740016	751	0.0817454	0.0760746	751	0.0850976	0.0761521
752	0.0778913	0.0740373	752	0.0818181	0.0760841	752	0.0851929	0.0770187
753	0.0777566	0.0740445	753	0.0817502	0.0758839	753	0.0850463	0.0765705
754	0.0777042	0.0740385	754	0.081557	0.076195	754	0.0848722	0.0771034
755	0.0776815	0.0740373	755	0.081172	0.0762963	755	0.0849175	0.0760329
756	0.0778151	0.073967	756	0.0810242	0.0762165	756	0.0850701	0.0768054
757	0.0779426	0.0739157	757	0.0811028	0.0757968	757	0.0848663	0.0764418
758	0.0779808	0.0739169	758	0.0808883	0.0761652	758	0.0850844	0.0766361
759	0.0780165	0.0739205	759	0.0813568	0.0753689	759	0.0850236	0.0768948
760	0.0780129	0.0740564	760	0.0816655	0.0757289	760	0.0850415	0.0763536
761	0.0780439	0.0741673	761	0.0816214	0.0755429	761	0.0850642	0.0767159
762	0.0780618	0.0742042	762	0.081712	0.0752795	762	0.0849831	0.0765598
763	0.0780916	0.074271	763	0.0816631	0.0752056	763	0.0850904	0.076288
764	0.078007	0.0742543	764	0.0819504	0.0758636	764	0.0852859	0.0769544
765	0.0781298	0.0743294	765	0.0822389	0.0754523	765	0.0849843	0.0748968
766	0.0780213	0.074389	766	0.0823534	0.0757492	766	0.0852168	0.075736
767	0.0779045	0.0744164	767	0.0820911	0.0749052	767	0.085057	0.0763905
768	0.0778913	0.0743747	768	0.082401	0.0749469	768	0.0855637	0.0742626
769	0.0772369	0.073663	769	0.0820577	0.0760198	769	0.0853574	0.0766563
770	0.0774968	0.0736487	770	0.0821626	0.0764644	770	0.0852287	0.0769556
771	0.07774	0.0737047	771	0.0823832	0.0752163	771	0.085156	0.0772905
772	0.0780141	0.0737548	772	0.0822961	0.0754917	772	0.0854468	0.0767183
773	0.078001	0.0736415	773	0.082339	0.0757802	773	0.0851858	0.0769448
774	0.0779033	0.0735843	774	0.082202	0.0762844	774	0.0853515	0.0775504
775	0.0778317	0.073483	775	0.0821781	0.0761306	775	0.0852609	0.0773334
776	0.0777364	0.0734985	776	0.0822759	0.0757623	776	0.0852966	0.0769293
777	0.0776267	0.0735033	777	0.0821972	0.076319	777	0.0853646	0.0770068
778	0.0775659	0.0734293	778	0.0822449	0.0758421	778	0.0855982	0.0776362
779	0.0775909	0.0735223	779	0.0818944	0.075196	779	0.0854111	0.0765276
780	0.0775552	0.07357	780	0.081749	0.0755847	780	0.0852382	0.0765276
781	0.0775218	0.073601	781	0.0819862	0.0758576	781	0.0851119	0.0768125
782	0.0775325	0.0735664	782	0.0818145	0.0759685	782	0.0855708	0.0773692
783	0.0775611	0.0736225	783	0.0818849	0.075649	783	0.085206	0.0758672
784	0.0776708	0.0735474	784	0.0820148	0.0759792	784	0.0852835	0.0767815
785	0.0777662	0.0735593	785	0.0819111	0.0757372	785	0.0850976	0.077337
786	0.0776505	0.0735998	786	0.0821733	0.07586	786	0.0850689	0.0768065
787	0.077641	0.0735617	787	0.0819075	0.076201	787	0.0848281	0.0769556
788	0.0776732	0.0736094	788	0.0820708	0.0758696	788	0.0852001	0.0766933
789	0.0776279	0.0735795	789	0.0819564	0.07604	789	0.0851309	0.0773323
790	0.0776899	0.0736701	790	0.0821114	0.075556	790	0.0848055	0.076586
791	0.0778949	0.0737083	791	0.0819385	0.0759387	791	0.0848341	0.0765824
792	0.0778401	0.0737548	792	0.0819075	0.0757897	792	0.0847781	0.0764954
793	0.0779104	0.0737178	793	0.0818789	0.0757158	793	0.0851429	0.0762844
794	0.0778747	0.0737035	794	0.0818658	0.0762641	794	0.0850892	0.0770366
795	0.0777566	0.0736403	795	0.0819159	0.0760019	795	0.0849462	0.0764263
796	0.0778127	0.0736797	796	0.0818121	0.0762904	796	0.0852597	0.0767207
797	0.0777578	0.0735855	797	0.0817764	0.0760078	797	0.0850213	0.0770986
798	0.0777423	0.0736845	798	0.081929	0.0757802	798	0.0848401	0.0769317
799	0.0777745	0.0736713	799	0.0816846	0.0764418	799	0.0849867	0.0760031
800	0.0776875	0.0737822	800	0.0817442	0.0761485	800	0.0851548	0.0767374
801	0.0777113	0.0736976	801	0.0820482	0.0759494	801	0.0850427	0.0774693
802	0.0776243	0.0736523	802	0.0819051	0.0761545	802	0.0849545	0.0763261
803	0.0777256	0.0736499	803	0.0818288	0.0759292	803	0.0852335	0.076977
804	0.0777268	0.0735879	804	0.0819647	0.075891	804	0.0853205	0.076381
805	0.0777185	0.0736964	805	0.082134	0.0762737	805	0.0849891	0.0772464
806	0.0776434	0.0737405	806	0.0819075	0.0761211	806	0.0852466	0.0769103
807	0.0776196	0.0737655	807	0.0822639	0.0760531	807	0.0850976	0.0767577
808	0.0776553	0.0737607	808	0.0822663	0.07653	808	0.085125	0.0769734
809	0.0776005	0.0738347	809	0.0824356	0.0763512	809	0.0849903	0.0778222
810	0.0776994	0.0738168	810	0.0821161	0.0759029	810	0.0853169	0.0761974
811	0.0776756	0.0738358	811	0.0820875	0.0760353	811	0.0849986	0.0762975
812	0.0777507	0.0738931	812	0.0821912	0.0756669	812	0.0852609	0.0771773
813	0.0777781	0.0739503	813	0.0818908	0.0759351	813	0.085026	0.0757313
814	0.0779307	0.0740373	814	0.0817668	0.0759137	814	0.0851321	0.0767922
815	0.0779903	0.074079	815	0.0816345	0.0759721	815	0.0850606	0.0763643
816	0.0779569	0.0740588	816	0.0816393	0.076071	816	0.0852454	0.0769675
817	0.077821	0.0740731	817	0.0815368	0.0758362	817	0.0850308	0.076642
818	0.077759	0.0740576	818	0.0813985	0.0759685	818	0.0850415	0.077014
819	0.077697	0.0740159	819	0.0810945	0.0760734	819	0.0849926	0.0760567
820	0.0778186	0.0740123	820	0.0810027	0.0760996	820	0.085206	0.0767863
821	0.0779188	0.0740349	821	0.0812328	0.0758123	821	0.0849736	0.0764227
822	0.0779784	0.074023	822	0.0810921	0.0762844	822	0.0851917	0.0767231
823	0.0780797	0.0740564	823	0.0815523	0.0754118	823	0.0849926	0.0768626
824	0.0780976	0.0741005	824	0.0817955	0.0756776	824	0.0849903	0.0764263
825	0.0780582	0.0741386	825	0.0817513	0.0756204	825	0.0849819	0.0766325
826	0.0781083	0.0742042	826	0.0817454	0.0754464	826	0.0849831	0.0765014
827	0.0780547	0.0742555	827	0.0817204	0.0751781	827	0.0850141	0.0763392
828	0.0780308	0.0742447	828	0.0821221	0.0758624	828	0.0851619	0.076865
829	0.0781476	0.0743151	829	0.0821817	0.0755191	829	0.0849855	0.0750637
830	0.0780809	0.0744772	830	0.0823188	0.0757492	830	0.0852215	0.0757706
831	0.0779974	0.0744617	831	0.0820935	0.0749969	831	0.0850594	0.0764775
832	0.0779045	0.0743866	832	0.0823772	0.0747621	832	0.0855076	0.0743592
833	0.0772226	0.0736821	833	0.0821316	0.0759089	833	0.0854063	0.0768268
834	0.0774586	0.0736773	834	0.0821126	0.0764644	834	0.0852621	0.0769627
835	0.0776517	0.0737619	835	0.0823224	0.0753188	835	0.0852156	0.0772476
836	0.0779414	0.0737476	836	0.0822592	0.0755703	836	0.0854969	0.0767231
837	0.0779009	0.0736177	837	0.0823402	0.0757849	837	0.0851953	0.0769079
838	0.0777555	0.0735962	838	0.0821888	0.0762069	838	0.0853276	0.0776231
839	0.0777376	0.0735152	839	0.0820875	0.076133	839	0.0852978	0.077343
840	0.0776827	0.0735939	840	0.082233	0.0757563	840	0.0853252	0.0770593
841	0.0776219	0.0735629	841	0.0820553	0.0763941	841	0.0855672	0.0769234
842	0.0775421	0.0734675	842	0.0819921	0.0758636	842	0.0856972	0.0774395
843	0.0776017	0.0734878	843	0.0817943	0.0751638	843	0.0854051	0.076586
844	0.0776219	0.0735915	844	0.0818157	0.0755358	844	0.085218	0.0765479
845	0.0775909	0.0735259	845	0.0819385	0.0758445	845	0.0851703	0.0768483
846	0.0775599	0.0734949	846	0.0817788	0.0759196	846	0.0855386	0.0774384
847	0.0775754	0.0736511	847	0.0819933	0.075748	847	0.0851977	0.0758076
848	0.0776279	0.0736058	848	0.082072	0.0758874	848	0.0852501	0.0767267
849	0.0777876	0.0735247	849	0.082016	0.075736	849	0.0850189	0.0774229
850	0.0777221	0.0735033	850	0.0822961	0.0758111	850	0.0849581	0.076772
851	0.0776923	0.0735033	851	0.0819123	0.0762367	851	0.0848293	0.0768101
852	0.0776935	0.0735986	852	0.0821066	0.0759232	852	0.085243	0.076642
853	0.0776184	0.0736153	853	0.0819409	0.0761151	853	0.0851083	0.0773346
854	0.0776875	0.0737441	854	0.0821126	0.0756621	854	0.0846124	0.0765276
855	0.0778532	0.0737774	855	0.0819123	0.0759053	855	0.0847983	0.076499
856	0.0778294	0.0737941	856	0.0819504	0.0758863	856	0.0848138	0.0764716
857	0.0778913	0.0737941	857	0.0818515	0.0756848	857	0.0851119	0.0763536
858	0.077877	0.0737631	858	0.0819182	0.0762689	858	0.0851548	0.0770509
859	0.0777757	0.0736392	859	0.0819457	0.0760758	859	0.0850213	0.0764954
860	0.0777245	0.0736666	860	0.0818706	0.0763226	860	0.0852585	0.0767767
861	0.0776827	0.0736833	861	0.0818956	0.0761187	861	0.0849962	0.0768661
862	0.0776839	0.0737774	862	0.0820136	0.0757515	862	0.0848782	0.0767648
863	0.0777566	0.0736964	863	0.0816727	0.076431	863	0.0849831	0.0760114
864	0.0777316	0.0737023	864	0.0818229	0.0761759	864	0.0850952	0.0765622
865	0.0777173	0.0736785	865	0.0820374	0.0760758	865	0.0849867	0.077523
866	0.0776744	0.0737202	866	0.0818801	0.0761509	866	0.0849652	0.0763488
867	0.0777543	0.0737536	867	0.0818539	0.0758052	867	0.0852776	0.0768852
868	0.0776565	0.0737262	868	0.0819778	0.0758481	868	0.0853384	0.0763547
869	0.0776803	0.0737834	869	0.0820708	0.0761127	869	0.0850105	0.0773835
870	0.0776374	0.0737715	870	0.0819731	0.0761962	870	0.0851846	0.0769877
871	0.0776386	0.0738323	871	0.0823808	0.0761914	871	0.0851202	0.0767255
872	0.077678	0.0738037	872	0.0822592	0.0765884	872	0.0852335	0.0770009
873	0.0776708	0.0738311	873	0.0823128	0.0763392	873	0.0850093	0.0778937
874	0.0777209	0.0738418	874	0.0819767	0.0759625	874	0.085324	0.0762045
875	0.0777805	0.0737894	875	0.0819433	0.076009	875	0.0851572	0.0761986
876	0.0778866	0.0738931	876	0.0819159	0.0757754	876	0.0853193	0.0771105
877	0.0778103	0.0739384	877	0.0817358	0.0758398	877	0.0851035	0.075618
878	0.0779915	0.0740528	878	0.081656	0.075835	878	0.0850773	0.076791
879	0.0779545	0.0741541	879	0.0815165	0.075748	879	0.0850487	0.0766385
880	0.0779891	0.0741184	880	0.081445	0.075984	880	0.0852489	0.0769317
881	0.0779057	0.0740349	881	0.0813568	0.0757718	881	0.0850129	0.0766671
882	0.0778627	0.0740147	882	0.0813556	0.0757277	882	0.0852323	0.0769687
883	0.0778234	0.0740647	883	0.0810921	0.0758183	883	0.0851178	0.0761068
884	0.0778913	0.0740838	884	0.0810683	0.0760365	884	0.0853169	0.0766551
885	0.0779462	0.0741088	885	0.0814056	0.0758553	885	0.0850475	0.0764608
886	0.0780272	0.0741327	886	0.0813293	0.0764585	886	0.0852108	0.0768125
887	0.0780988	0.0741446	887	0.0817585	0.0754309	887	0.0848997	0.076828
888	0.0781465	0.0741458	888	0.0819492	0.0755572	888	0.0849545	0.0764978
889	0.0781024	0.0741649	889	0.0817871	0.0756562	889	0.0849056	0.0766683
890	0.0781691	0.0742114	890	0.0817752	0.0755715	890	0.0850511	0.0765991
891	0.0781035	0.0742173	891	0.0818348	0.0752366	891	0.0850463	0.0763321
892	0.0780761	0.0742865	892	0.0822294	0.0758028	892	0.0850356	0.0767004
893	0.0780797	0.0743425	893	0.0821531	0.0755429	893	0.0850677	0.0751996
894	0.0781322	0.0744939	894	0.0822032	0.0758326	894	0.0851214	0.0758231
895	0.0780642	0.0744283	895	0.0821292	0.0751495	895	0.0850093	0.0765467
896	0.0779653	0.0743425	896	0.0823283	0.0747311	896	0.0853765	0.0745904
897	0.0772858	0.0736964	897	0.0821567	0.0758433	897	0.0854433	0.0770617
898	0.077436	0.0737357	898	0.0820422	0.0763381	898	0.0852835	0.077064
899	0.0776207	0.0738049	899	0.0823009	0.0753129	899	0.0853157	0.0772595
900	0.0778174	0.0737917	900	0.0821829	0.0757372	900	0.0855005	0.0768256
901	0.0778282	0.0736499	901	0.0822198	0.0759208	901	0.0852227	0.0768721
902	0.0777125	0.0736487	902	0.0821495	0.0760233	902	0.0852609	0.0776577
903	0.0776911	0.0736165	903	0.0819302	0.0760591	903	0.0852525	0.0774586
904	0.0776553	0.073688	904	0.0821626	0.0757468	904	0.0853539	0.0772595
905	0.0776446	0.0736475	905	0.0819838	0.0764024	905	0.0855935	0.0768864
906	0.0775838	0.0735569	906	0.0818956	0.0758576	906	0.0855505	0.0772703
907	0.0776029	0.0735319	907	0.0817001	0.0753558	907	0.0853765	0.0765288
908	0.0776601	0.0735641	908	0.081867	0.075537	908	0.0851476	0.0765872
909	0.0776958	0.0735795	909	0.0817931	0.0758886	909	0.0851977	0.0768471
910	0.0776529	0.0734746	910	0.0817204	0.0759292	910	0.0855291	0.0775135
911	0.077616	0.0736499	911	0.0820625	0.0757432	911	0.0850904	0.0758636
912	0.0776482	0.0735521	912	0.0821722	0.0759327	912	0.0851202	0.0765288
913	0.0777066	0.073477	913	0.0820494	0.075773	913	0.085001	0.0773728
914	0.0777459	0.0734603	914	0.0824404	0.0757098	914	0.0849271	0.0769436
915	0.0777543	0.0734961	915	0.0819266	0.0763011	915	0.0848436	0.0767422
916	0.0777519	0.0735962	916	0.0820422	0.0759447	916	0.0852418	0.0765872
917	0.077585	0.0736225	917	0.0819528	0.0760925	917	0.0850689	0.0773644
918	0.0776887	0.0737643	918	0.0820339	0.0757062	918	0.0845957	0.0765276
919	0.0778079	0.0737381	919	0.0819111	0.0759208	919	0.0848615	0.0765324
920	0.0777996	0.0738168	920	0.0818706	0.0760603	920	0.0849247	0.0764596
921	0.0778902	0.0737643	921	0.0817251	0.0757837	921	0.0850451	0.0764441
922	0.077827	0.0737417	922	0.0818872	0.0761962	922	0.0851059	0.0771213
923	0.0777686	0.0736988	923	0.08201	0.0761247	923	0.0849688	0.0765097
924	0.0777185	0.0737035	924	0.0819373	0.0764358	924	0.0851893	0.0767577
925	0.0776434	0.0737453	925	0.0819266	0.0762379	925	0.0851393	0.0768101
926	0.0776041	0.0737786	926	0.0820172	0.0756884	926	0.0850248	0.0768006
927	0.0776541	0.073719	927	0.0817752	0.0763559	927	0.084945	0.0760365
928	0.0776958	0.0737202	928	0.0817883	0.0762081	928	0.085007	0.076406
929	0.0777817	0.0737441	929	0.081985	0.0763047	929	0.085026	0.0774586
930	0.0777066	0.0738049	930	0.0819743	0.076201	930	0.0850797	0.0763965
931	0.0777137	0.0738573	931	0.0819361	0.0758922	931	0.0853395	0.0769341
932	0.0776732	0.0738633	932	0.0821197	0.0758874	932	0.0853741	0.0762534
933	0.0775909	0.0738299	933	0.0819683	0.0760746	933	0.0851452	0.0774825
934	0.077647	0.0738335	934	0.0822139	0.0760627	934	0.085218	0.0771105
935	0.0776935	0.0738645	935	0.0822914	0.0763321	935	0.0851882	0.0766981
936	0.077703	0.073818	936	0.0821638	0.076648	936	0.0853348	0.0771165
937	0.0777841	0.0738049	937	0.0820613	0.0762975	937	0.085218	0.0779593
938	0.0777912	0.0737989	938	0.0817573	0.0758755	938	0.0853574	0.0764763
939	0.0778341	0.0738335	939	0.0816965	0.0759733	939	0.0853264	0.0761652
940	0.0779796	0.0739312	940	0.0816524	0.0758469	940	0.0851452	0.0770044
941	0.0779152	0.0739753	941	0.0815773	0.0757921	941	0.0850964	0.0757599
942	0.0780416	0.0740445	942	0.0814927	0.0757182	942	0.0849259	0.0767863
943	0.0779521	0.0741315	943	0.0813806	0.0755179	943	0.0851142	0.0769258
944	0.0779617	0.0741148	944	0.0812066	0.0758767	944	0.0852716	0.076896
945	0.0780153	0.0740445	945	0.0812507	0.075711	945	0.0850046	0.0767481
946	0.0780237	0.0740731	946	0.081284	0.0756896	946	0.085243	0.076834
947	0.0779808	0.0741827	947	0.0811625	0.0757205	947	0.0851846	0.0760746
948	0.0779939	0.074147	948	0.0811136	0.0760686	948	0.0853384	0.0764668
949	0.0779629	0.0741506	949	0.0817096	0.0758219	949	0.0850105	0.0765717
950	0.0780809	0.0741553	950	0.0815892	0.0765514	950	0.0852168	0.0768256
951	0.0781214	0.0741947	951	0.0819421	0.0754976	951	0.0848401	0.0768745
952	0.0781453	0.0741804	952	0.0820017	0.0755215	952	0.0849044	0.0766456
953	0.0781512	0.07424	953	0.081811	0.0756454	953	0.0849581	0.0765955
954	0.0781357	0.0742221	954	0.0818443	0.0755656	954	0.0851178	0.0767207
955	0.0781989	0.0742233	955	0.081985	0.075413	955	0.0850964	0.0764191
956	0.0781238	0.0743091	956	0.0822723	0.0757074	956	0.0850177	0.0766337
957	0.0780797	0.0743878	957	0.0819707	0.0754964	957	0.0850773	0.0752401
958	0.0781024	0.0744522	958	0.0821328	0.0758827	958	0.0850308	0.0757623
959	0.0781322	0.0743413	959	0.0821388	0.0753081	959	0.0849497	0.0765479
960	0.0780439	0.0743437	960	0.0823319	0.0748026	960	0.0852478	0.0747645
961	0.077318	0.0737119	961	0.0821543	0.0759304	961	0.0854003	0.0772083
962	0.077455	0.0737309	962	0.0820518	0.076251	962	0.08533	0.0770462
963	0.0776255	0.073781	963	0.0822592	0.0752127	963	0.0853765	0.0772762
964	0.0777102	0.0738049	964	0.0820887	0.0757623	964	0.0854933	0.076828
965	0.0777304	0.0736845	965	0.0822961	0.0759494	965	0.0851905	0.0768399
966	0.0776565	0.0737178	966	0.0820947	0.0759554	966	0.0851822	0.0776899
967	0.0777256	0.0736904	967	0.0817811	0.0760496	967	0.0852859	0.0774705
968	0.0776601	0.0737274	968	0.0820768	0.0757015	968	0.0853229	0.077368
969	0.0776339	0.0736964	969	0.0819361	0.0762951	969	0.0855219	0.0769067
970	0.0775719	0.0735903	970	0.0819469	0.0758731	970	0.0854146	0.0772786
971	0.0776327	0.0735712	971	0.0817227	0.0754404	971	0.085299	0.0765407
972	0.0776947	0.0735641	972	0.0818336	0.0757039	972	0.0849831	0.0766039
973	0.0777376	0.073595	973	0.0818181	0.075978	973	0.085125	0.07689
974	0.0776899	0.0735271	974	0.0817668	0.0759304	974	0.0854945	0.0775945
975	0.0777125	0.0735271	975	0.0820935	0.0757444	975	0.084933	0.0757897
976	0.0777364	0.0734353	976	0.0823069	0.0758863	976	0.0848746	0.0763381
977	0.0777411	0.073427	977	0.0821304	0.0757957	977	0.084964	0.0773132
978	0.0777113	0.0734746	978	0.0824213	0.0757289	978	0.0848854	0.0771165
979	0.0777268	0.0735283	979	0.0819254	0.0762963	979	0.084945	0.0767183
980	0.0778043	0.0735748	980	0.0819755	0.0759804	980	0.0851488	0.0766683
981	0.0775886	0.0736225	981	0.0819635	0.076139	981	0.0851166	0.0774205
982	0.0776756	0.0737023	982	0.0819933	0.075798	982	0.0846982	0.0766289
983	0.0777912	0.0737214	983	0.0819576	0.0759554	983	0.0848985	0.076586
984	0.0777805	0.0737536	984	0.0818205	0.07617	984	0.0849617	0.0765705
985	0.0778747	0.0737071	985	0.0816703	0.0758982	985	0.0850582	0.0765276
986	0.0778139	0.0737202	986	0.0818956	0.0761104	986	0.0849497	0.0771213
987	0.0777829	0.0737858	987	0.0820482	0.0761545	987	0.0849187	0.0764859
988	0.07774	0.0737882	988	0.0819981	0.0763512	988	0.0852036	0.076704
989	0.0776684	0.0737453	989	0.0819337	0.0762844	989	0.0852227	0.0768328
990	0.0776696	0.0737476	990	0.0819707	0.0757945	990	0.0851393	0.0769567
991	0.077641	0.0737154	991	0.0818765	0.0763309	991	0.0849211	0.0762177
992	0.0776684	0.0738049	992	0.0818431	0.0762618	992	0.0850952	0.0762439
993	0.0777316	0.0738358	993	0.0820589	0.0763404	993	0.0850213	0.0773001
994	0.0776982	0.0739253	994	0.0819612	0.0762272	994	0.0851452	0.0765193
995	0.0777936	0.0739825	995	0.0820851	0.0759971	995	0.0854135	0.077064
996	0.0777876	0.0739419	996	0.0822473	0.0759089	996	0.0853097	0.0763023
997	0.0776172	0.0739324	997	0.0819862	0.0761557	997	0.0851512	0.0775254
998	0.0776386	0.0739253	998	0.0822985	0.0760305	998	0.0851142	0.0771558
999	0.0777292	0.0738978	999	0.0821662	0.0763094	999	0.0852704	0.0765634
1000	0.0777471	0.0738728	1000	0.0820136	0.0766468	1000	0.0854397	0.077163
1001	0.077846	0.0738168	1001	0.0818467	0.0763595	1001	0.0853777	0.078032
1002	0.0778317	0.0738227	1002	0.081495	0.075835	1002	0.0853896	0.0766253
1003	0.077908	0.0738943	1003	0.0815141	0.0759459	1003	0.085305	0.0761318
1004	0.0780118	0.0739539	1004	0.0814903	0.0757492	1004	0.085001	0.0769734
1005	0.077976	0.073961	1005	0.0813544	0.0756586	1005	0.0851262	0.0757587
1006	0.0781095	0.074023	1006	0.0812316	0.0755727	1006	0.0850546	0.0767314
1007	0.0780439	0.0740659	1007	0.0811338	0.0754166	1007	0.0851738	0.0769985
1008	0.0779831	0.0741029	1008	0.0810444	0.0758064	1008	0.0852251	0.0770509
1009	0.0780201	0.0741076	1009	0.0811183	0.075587	1009	0.0849497	0.0768578
1010	0.0781119	0.0741458	1010	0.0812161	0.0756514	1010	0.0852001	0.0767004
1011	0.0781298	0.0741673	1011	0.0811255	0.0756681	1011	0.0850642	0.0761652
1012	0.0781286	0.0741863	1012	0.0812531	0.0761771	1012	0.0852072	0.0764132
1013	0.078069	0.0741518	1013	0.0820923	0.0756645	1013	0.0848639	0.0765133
1014	0.078125	0.0741673	1014	0.0818598	0.0765622	1014	0.0852048	0.0767624
1015	0.0781894	0.0741744	1015	0.0821626	0.0755155	1015	0.084784	0.076977
1016	0.0781751	0.074228	1016	0.0820518	0.0756872	1016	0.0849569	0.0767207
1017	0.0781298	0.0742328	1017	0.0818515	0.0755394	1017	0.0850439	0.0765264
1018	0.0781655	0.0742376	1018	0.081929	0.0754952	1018	0.0851166	0.0768387
1019	0.0783062	0.0742626	1019	0.0820839	0.0755179	1019	0.0850391	0.0765967
1020	0.0782156	0.0742948	1020	0.0822282	0.0757265	1020	0.0849438	0.076741
1021	0.078187	0.0743341	1021	0.0818777	0.0754535	1021	0.0850368	0.0751829
1022	0.0781476	0.0743353	1022	0.0820756	0.0759006	1022	0.0849986	0.0756657
1023	0.0781429	0.0743282	1023	0.082233	0.0754941	1023	0.084933	0.076474
1024	0.0780845	0.0744236	1024	0.0822747	0.0747323	1024	0.0851297	0.0749099
1025	0.0772953	0.0737357	1025	0.0821555	0.0759459	1025	0.0853598	0.0772405
1026	0.0774264	0.0736845	1026	0.082078	0.0762165	1026	0.0854421	0.0770104
1027	0.0776315	0.0737429	1027	0.0822389	0.0751495	1027	0.0853586	0.0773895
1028	0.077678	0.0738049	1028	0.0820816	0.0757277	1028	0.0853145	0.0768769
1029	0.0777102	0.0737917	1029	0.0822616	0.0758266	1029	0.0851512	0.0768244
1030	0.0776434	0.0737655	1030	0.0819993	0.0758648	1030	0.0850677	0.0775766
1031	0.0777364	0.0737453	1031	0.0816751	0.0760722	1031	0.0853276	0.0775301
1032	0.0776887	0.073756	1032	0.0819492	0.0755787	1032	0.085212	0.0774574
1033	0.0776899	0.0736475	1033	0.0819445	0.076102	1033	0.0852871	0.0768995
1034	0.0775707	0.0736439	1034	0.0819588	0.0758648	1034	0.0852787	0.0773633
1035	0.0776136	0.0736248	1035	0.0816643	0.0755143	1035	0.0852954	0.0766098
1036	0.0777173	0.0736332	1036	0.0818014	0.0757837	1036	0.0849056	0.0766456
1037	0.0777173	0.073626	1037	0.081898	0.0760818	1037	0.0850666	0.0768936
1038	0.0776792	0.0735188	1038	0.0819218	0.0760067	1038	0.0854719	0.0776017
1039	0.0777268	0.0734317	1039	0.0821233	0.0758111	1039	0.0848591	0.0757456
1040	0.0777435	0.0733626	1040	0.0824022	0.0757992	1040	0.0847745	0.0763333
1041	0.0777566	0.0733638	1041	0.0821364	0.0758755	1041	0.0849009	0.0771427
1042	0.0776887	0.0734973	1042	0.0823176	0.0758004	1042	0.0848973	0.0772452
1043	0.0776625	0.0735307	1043	0.081948	0.0762761	1043	0.0849998	0.0767052
1044	0.0777709	0.0735712	1044	0.081892	0.0759113	1044	0.0851941	0.0767612
1045	0.0776517	0.0736022	1045	0.0819826	0.0762129	1045	0.0851619	0.0774705
1046	0.0777018	0.0736535	1046	0.0819802	0.0758767	1046	0.0848067	0.0767326
1047	0.0777388	0.0736642	1047	0.0820911	0.076102	1047	0.084933	0.0765538
1048	0.0777853	0.0737321	1048	0.081805	0.0762463	1048	0.0848627	0.076741
1049	0.0778615	0.0736988	1049	0.0817084	0.0759399	1049	0.0849187	0.0766873
1050	0.0777829	0.0737739	1050	0.0819302	0.0761473	1050	0.0848246	0.0770819
1051	0.0778294	0.0737882	1051	0.0820935	0.0761437	1051	0.08497	0.0764883
1052	0.0778079	0.0738227	1052	0.0821006	0.0762367	1052	0.0852382	0.0767529
1053	0.0777078	0.073688	1053	0.0818586	0.0763035	1053	0.0852907	0.076772
1054	0.0777292	0.0736737	1054	0.0819099	0.0759041	1054	0.0850928	0.0770247
1055	0.0777173	0.0737739	1055	0.081898	0.0763547	1055	0.0848651	0.0764692
1056	0.077728	0.0738561	1056	0.0818956	0.0762427	1056	0.0851536	0.0762308
1057	0.0777638	0.0739181	1057	0.0820327	0.0762808	1057	0.0850153	0.077225
1058	0.0776863	0.0740206	1058	0.0820339	0.076344	1058	0.0852752	0.0766933
1059	0.0778365	0.0740516	1059	0.0821817	0.0760722	1059	0.0854695	0.0771832
1060	0.0778532	0.0739956	1060	0.0822818	0.0760078	1060	0.085187	0.0763953
1061	0.0777054	0.073998	1061	0.0820518	0.0761688	1061	0.0851238	0.0774932
1062	0.0777125	0.0739706	1062	0.0822604	0.0760639	1062	0.0851214	0.0771177
1063	0.0777662	0.073905	1063	0.081985	0.0762391	1063	0.0854385	0.0765073
1064	0.077734	0.0738907	1064	0.081805	0.0765574	1064	0.0856161	0.0771677
1065	0.0778711	0.0738585	1065	0.0815248	0.07635	1065	0.085603	0.0781131
1066	0.0779068	0.0739264	1066	0.0813591	0.0758708	1066	0.085336	0.0767899
1067	0.0778806	0.0739336	1067	0.0813675	0.0759006	1067	0.0852931	0.0761926
1068	0.0780094	0.0739658	1068	0.0813794	0.0754905	1068	0.0848639	0.0769794
1069	0.0780225	0.0739515	1069	0.0811017	0.0755227	1069	0.0853419	0.0758576
1070	0.0781381	0.0739765	1070	0.0810742	0.0754869	1070	0.0852335	0.0767648
1071	0.0780988	0.0740409	1071	0.0810182	0.0754035	1071	0.0851643	0.0769019
1072	0.0780797	0.0741029	1072	0.0810325	0.0757122	1072	0.0851417	0.0770223
1073	0.078069	0.0741434	1073	0.0810301	0.0754499	1073	0.0849772	0.0769925
1074	0.078131	0.0741851	1074	0.0810683	0.0755155	1074	0.0850391	0.0767195
1075	0.0782061	0.0741959	1075	0.0810874	0.0757229	1075	0.0849843	0.0761938
1076	0.0782502	0.0742328	1076	0.0814259	0.0762057	1076	0.0851321	0.0763285
1077	0.0781846	0.0741613	1077	0.0822747	0.075556	1077	0.0848126	0.0765324
1078	0.0782466	0.0741887	1078	0.0820267	0.0764227	1078	0.0851071	0.0767791
1079	0.0782633	0.0741446	1079	0.0821614	0.0754929	1079	0.084883	0.0771654
1080	0.0782204	0.0741553	1080	0.0821269	0.0757706	1080	0.0849748	0.0766361
1081	0.0781429	0.0742209	1081	0.0819361	0.0755358	1081	0.0851119	0.07653
1082	0.0782108	0.0743043	1082	0.0820231	0.0754452	1082	0.0850713	0.0769711
1083	0.0783253	0.0742352	1083	0.082128	0.0755501	1083	0.0849187	0.0768077
1084	0.0782549	0.0742412	1084	0.082134	0.0758553	1084	0.0848269	0.0769162
1085	0.0782454	0.0742686	1085	0.0817645	0.0754416	1085	0.0850642	0.0751746
1086	0.078218	0.0743186	1086	0.0820673	0.0758648	1086	0.0850248	0.0757086
1087	0.0781643	0.0744164	1087	0.0821996	0.0754762	1087	0.0849843	0.0764978
1088	0.0781143	0.0744569	1088	0.0822389	0.0746667	1088	0.0851417	0.0749838
1089	0.0772679	0.0736547	1089	0.0821495	0.0758648	1089	0.0852847	0.0771487
1090	0.0773442	0.0736785	1090	0.0820446	0.0762975	1090	0.0854468	0.0770092
1091	0.0775802	0.0737643	1091	0.0821209	0.0752199	1091	0.0852382	0.077461
1092	0.077697	0.0738323	1092	0.0820303	0.0756288	1092	0.0852144	0.0769913
1093	0.0777793	0.0737917	1093	0.0821066	0.0757241	1093	0.0852335	0.0769413
1094	0.0777018	0.0737977	1094	0.0819623	0.0757897	1094	0.0850582	0.0774956
1095	0.0776577	0.0737929	1095	0.0816548	0.0761342	1095	0.0852728	0.0775158
1096	0.0777483	0.0737274	1096	0.0819409	0.0755703	1096	0.0851083	0.0774765
1097	0.0777364	0.0735509	1097	0.0819886	0.0759673	1097	0.0851011	0.0769269
1098	0.0776625	0.0736618	1098	0.0819695	0.0757837	1098	0.0852096	0.077306
1099	0.0775802	0.0736356	1099	0.0815427	0.0755215	1099	0.0852954	0.0765252
1100	0.0776923	0.0736725	1100	0.0818551	0.0759053	1100	0.0849223	0.0766981
1101	0.0776923	0.0736141	1101	0.0820136	0.0761414	1101	0.0849891	0.0768864
1102	0.0776243	0.0734699	1102	0.0821102	0.0761139	1102	0.0854266	0.0775421
1103	0.0776815	0.0733685	1103	0.0821304	0.0758076	1103	0.0848937	0.0758445
1104	0.0776947	0.0733328	1104	0.0823534	0.0757849	1104	0.0848711	0.0762045
1105	0.0777435	0.0733328	1105	0.0820577	0.0758719	1105	0.084852	0.0770462
1106	0.0777102	0.0734639	1106	0.0823307	0.0757825	1106	0.0848758	0.0772798
1107	0.0776064	0.073477	1107	0.0820827	0.0762749	1107	0.0849855	0.0767684
1108	0.0776875	0.0735736	1108	0.0819063	0.0759196	1108	0.0853086	0.0767887
1109	0.0776124	0.0736058	1109	0.0820613	0.0761998	1109	0.0851095	0.0775719
1110	0.0777125	0.073595	1110	0.0820708	0.0758624	1110	0.0849628	0.076859
1111	0.07774	0.0736475	1111	0.0821197	0.0762522	1111	0.0848949	0.0765836
1112	0.0777566	0.0737047	1112	0.0819016	0.0763094	1112	0.084796	0.0767481
1113	0.0778008	0.0737095	1113	0.0818801	0.0760221	1113	0.0848472	0.0768304
1114	0.0777209	0.0737512	1114	0.0818908	0.0761426	1114	0.0848317	0.0770509
1115	0.0777853	0.0737715	1115	0.0820863	0.0761652	1115	0.0849652	0.0765562
1116	0.0778151	0.073787	1116	0.0821519	0.0762165	1116	0.0853133	0.076822
1117	0.0777531	0.0737441	1117	0.0817323	0.0762916	1117	0.0852537	0.0766611
1118	0.0777113	0.0737345	1118	0.0818396	0.0759292	1118	0.0850976	0.0770116
1119	0.0777829	0.0737965	1119	0.0819361	0.076462	1119	0.0850224	0.076617
1120	0.0777471	0.0739241	1120	0.081929	0.0762737	1120	0.0851905	0.0763106
1121	0.0778556	0.073992	1121	0.0821042	0.0761735	1121	0.0850439	0.0771952
1122	0.0777161	0.0740814	1122	0.0822079	0.0765014	1122	0.0854039	0.0767934
1123	0.0778151	0.0741363	1123	0.0822711	0.0760973	1123	0.0853956	0.0772572
1124	0.0778472	0.0740576	1124	0.0823247	0.0760663	1124	0.0850677	0.0765133
1125	0.0778091	0.0740433	1125	0.0820518	0.0761366	1125	0.0851321	0.0775349
1126	0.0778162	0.0739634	1126	0.0820994	0.0760901	1126	0.0853848	0.0770724
1127	0.0778687	0.0739026	1127	0.0817025	0.0762165	1127	0.0855565	0.0764835
1128	0.0778389	0.0739479	1128	0.0816429	0.0763762	1128	0.085808	0.077163
1129	0.0779164	0.0739741	1129	0.0812721	0.0762415	1129	0.0857711	0.0781822
1130	0.0779486	0.0739908	1130	0.0811851	0.075897	1130	0.0853443	0.0769258
1131	0.0779092	0.0739741	1131	0.081284	0.0758982	1131	0.0854015	0.0763273
1132	0.0780213	0.0739729	1132	0.0812244	0.0752604	1132	0.0851095	0.0770009
1133	0.0780404	0.0739467	1133	0.0809562	0.0755835	1133	0.0854731	0.0760424
1134	0.0781512	0.0739968	1134	0.0810313	0.0755966	1134	0.0853252	0.0768363
1135	0.0781584	0.0740397	1135	0.0810218	0.0755763	1135	0.0850511	0.07689
1136	0.0781524	0.0741303	1136	0.0810444	0.0755906	1136	0.085001	0.0768113
1137	0.0781858	0.0741732	1137	0.0810921	0.0753772	1137	0.0849438	0.0770998
1138	0.0781751	0.0741768	1138	0.080961	0.0754046	1138	0.0848281	0.0766575
1139	0.0782275	0.0741792	1139	0.0812197	0.0757563	1139	0.0849581	0.0762916
1140	0.0783122	0.0742245	1140	0.0816941	0.0762653	1140	0.0850272	0.0764024
1141	0.0782549	0.0741661	1141	0.0823557	0.075376	1141	0.0848901	0.0765693
1142	0.0783026	0.0741744	1142	0.0820553	0.0762844	1142	0.0849986	0.0768197
1143	0.0783587	0.0741053	1143	0.0820935	0.0754941	1143	0.0849724	0.0773764
1144	0.0782239	0.0741804	1144	0.0821197	0.0758076	1144	0.0850606	0.0765049
1145	0.0781572	0.0742412	1145	0.0820315	0.0756824	1145	0.0851285	0.0765467
1146	0.0781858	0.0743258	1146	0.0820911	0.0754404	1146	0.0850153	0.0770068
1147	0.0783193	0.0742054	1147	0.082128	0.0755167	1147	0.0848472	0.0769436
1148	0.0782847	0.0741851	1148	0.0820851	0.0759447	1148	0.0848591	0.0770581
1149	0.0782549	0.0742364	1149	0.0817585	0.0755739	1149	0.0850248	0.0752401
1150	0.0782466	0.074265	1150	0.0820673	0.0758672	1150	0.0850463	0.0756311
1151	0.0782156	0.0744557	1151	0.0820887	0.0754797	1151	0.0849462	0.0766265
1152	0.0781703	0.0744987	1152	0.0820243	0.0744843	1152	0.0852549	0.0750577
1153	0.0772297	0.0736547	1153	0.0821722	0.0757575	1153	0.085218	0.0771189
1154	0.0772703	0.0736904	1154	0.0820684	0.0763071	1154	0.0854778	0.0768244
1155	0.0775146	0.0737822	1155	0.0820804	0.0753176	1155	0.0852132	0.0774884
1156	0.0776756	0.0738907	1156	0.0820184	0.0755441	1156	0.0852954	0.0771379
1157	0.0778317	0.0737572	1157	0.0820017	0.0756967	1157	0.0852633	0.0770986
1158	0.0777996	0.0738108	1158	0.0819039	0.0757849	1158	0.0851274	0.0774634
1159	0.0777233	0.073787	1159	0.0816715	0.0761688	1159	0.0851893	0.0773787
1160	0.0776947	0.0737023	1160	0.0819659	0.0755715	1160	0.0850451	0.0776553
1161	0.0777805	0.073601	1161	0.0819957	0.0759459	1161	0.0849986	0.0768721
1162	0.0777829	0.0736892	1162	0.0818646	0.0757957	1162	0.0851619	0.077306
1163	0.077672	0.0736928	1163	0.0816154	0.0755596	1163	0.0853372	0.076586
1164	0.0777161	0.0736296	1164	0.0819528	0.0759673	1164	0.0849485	0.0768518
1165	0.0776243	0.0735676	1165	0.082078	0.0760806	1165	0.0849855	0.0768721
1166	0.0775695	0.0734532	1166	0.0822258	0.0761831	1166	0.085392	0.0774038
1167	0.0776732	0.0734174	1167	0.0820625	0.0759876	1167	0.0849974	0.0759661
1168	0.0776863	0.0733709	1168	0.0822592	0.0758719	1168	0.0850606	0.0762105
1169	0.0776923	0.0733674	1169	0.0820398	0.0757813	1169	0.0847578	0.0769484
1170	0.0776875	0.0733697	1170	0.0823915	0.0757968	1170	0.0847816	0.0772154
1171	0.0776339	0.0734079	1171	0.0821638	0.0762439	1171	0.0850976	0.0768673
1172	0.0776052	0.0735462	1172	0.0818801	0.0760126	1172	0.0853229	0.0768554
1173	0.0775897	0.0735557	1173	0.0820625	0.0762141	1173	0.0850368	0.0775778
1174	0.0776601	0.0736153	1174	0.0821161	0.0759351	1174	0.0850105	0.0770283
1175	0.0778091	0.0736725	1175	0.0821376	0.0762892	1175	0.0848591	0.0766408
1176	0.0777531	0.073756	1176	0.0820184	0.0762522	1176	0.0848186	0.0767374
1177	0.0778067	0.0737715	1177	0.0818884	0.07622	1177	0.0849092	0.076952
1178	0.0776756	0.0736892	1178	0.0819683	0.0762296	1178	0.0849545	0.0770414
1179	0.0777113	0.0737178	1179	0.0820863	0.0762391	1179	0.085026	0.0766861
1180	0.0777555	0.0737894	1180	0.0820851	0.076319	1180	0.085305	0.0768447
1181	0.07774	0.0737953	1181	0.0817704	0.0763774	1181	0.0851572	0.0766861
1182	0.0777042	0.0738108	1182	0.0818682	0.0759172	1182	0.0851834	0.076983
1183	0.0778019	0.0738275	1183	0.0820684	0.0764728	1183	0.0851572	0.0767231
1184	0.0777841	0.0739086	1184	0.0820243	0.0763416	1184	0.0852787	0.0764716
1185	0.0779176	0.074017	1185	0.0821805	0.0761724	1185	0.0851762	0.0772595
1186	0.0778103	0.074091	1186	0.0823212	0.0764954	1186	0.0856423	0.0768495
1187	0.0778508	0.0741887	1187	0.082314	0.0761545	1187	0.0853896	0.0772119
1188	0.0779057	0.0740957	1188	0.0822568	0.0760984	1188	0.0850987	0.0765204
1189	0.0778759	0.0740731	1189	0.0820029	0.0761795	1189	0.0852489	0.0775456
1190	0.077945	0.0740194	1190	0.0819099	0.0762415	1190	0.0854945	0.0769162
1191	0.0780261	0.0739932	1191	0.0814629	0.0761294	1191	0.0856936	0.0765216
1192	0.0780427	0.0740099	1192	0.0814331	0.0762105	1192	0.0859463	0.0770485
1193	0.0779867	0.0740671	1193	0.0811088	0.0760913	1193	0.0857353	0.0781417
1194	0.077976	0.0740206	1194	0.0811601	0.0758421	1194	0.0852728	0.0770259
1195	0.0779665	0.0739825	1195	0.0812161	0.0759447	1195	0.0855899	0.0764477
1196	0.0780249	0.0739634	1196	0.081048	0.075171	1196	0.0853932	0.077132
1197	0.0779998	0.0739694	1197	0.0808358	0.0755262	1197	0.0855041	0.0762808
1198	0.0781357	0.074017	1198	0.0810862	0.0756538	1198	0.0853384	0.0768876
1199	0.0781882	0.0740862	1199	0.0811148	0.075599	1199	0.0849712	0.0768864
1200	0.0781631	0.0741065	1200	0.0811481	0.0755763	1200	0.084976	0.0767958
1201	0.0782883	0.074209	1201	0.0811052	0.0753105	1201	0.0848174	0.0770903
1202	0.0782895	0.0742126	1202	0.0809622	0.0753438	1202	0.0847602	0.0764859
1203	0.0783467	0.0742221	1203	0.0815415	0.0756693	1203	0.0849712	0.0763714
1204	0.0783348	0.0742269	1204	0.081898	0.0762308	1204	0.0850141	0.0764775
1205	0.0782526	0.0741506	1205	0.0822949	0.0752771	1205	0.085063	0.0766563
1206	0.078311	0.0742078	1206	0.0820637	0.0760639	1206	0.0849569	0.0768924
1207	0.0783944	0.0741315	1207	0.0820136	0.0755477	1207	0.0849438	0.0775468
1208	0.0783312	0.0742364	1208	0.0820339	0.0757122	1208	0.0850582	0.0763929
1209	0.0782251	0.074228	1209	0.0820553	0.0757432	1209	0.0850737	0.0765324
1210	0.0782013	0.074265	1210	0.0822341	0.075438	1210	0.0849819	0.0769663
1211	0.0782788	0.0741684	1211	0.0821769	0.0753558	1211	0.0848937	0.076865
1212	0.0782788	0.0741684	1212	0.0820065	0.0759363	1212	0.0849795	0.077225
1213	0.0782418	0.0742793	1213	0.0818682	0.0756693	1213	0.0849867	0.0753617
1214	0.0782394	0.0742972	1214	0.0819921	0.075984	1214	0.0850987	0.0755978
1215	0.0782251	0.074439	1215	0.0818932	0.0755072	1215	0.0849438	0.0767052
1216	0.0782633	0.0744689	1216	0.0818992	0.0744152	1216	0.085355	0.0752211
1217	0.0772202	0.073638	1217	0.0822127	0.0756919	1217	0.0851381	0.0770628
1218	0.077244	0.0736976	1218	0.0820339	0.0763345	1218	0.0854635	0.0767374
1219	0.0774527	0.0737882	1219	0.0820756	0.0754511	1219	0.0851786	0.0774074
1220	0.0776577	0.0738776	1220	0.0819135	0.0753891	1220	0.0852871	0.0771749
1221	0.0778484	0.0737572	1221	0.0818932	0.0756907	1221	0.0852454	0.0771117
1222	0.0778842	0.0737894	1222	0.08183	0.0758028	1222	0.0850856	0.0775349
1223	0.0778186	0.0737345	1223	0.0817859	0.0761569	1223	0.0851095	0.0773072
1224	0.0777781	0.0736964	1224	0.0819492	0.0755858	1224	0.0850308	0.0778019
1225	0.0777519	0.0736547	1225	0.081861	0.0759339	1225	0.0849652	0.0768185
1226	0.0779104	0.0737572	1226	0.0818038	0.0759208	1226	0.0850666	0.0772524
1227	0.0777829	0.073688	1227	0.0817657	0.0755477	1227	0.0852513	0.0765526
1228	0.0777769	0.0735724	1228	0.0821054	0.0760186	1228	0.0849342	0.0769651
1229	0.0776041	0.0735211	1229	0.0821209	0.0760567	1229	0.0850022	0.0768423
1230	0.077554	0.0734651	1230	0.0822055	0.0762236	1230	0.085417	0.0774169
1231	0.0776529	0.0734806	1231	0.081985	0.0760949	1231	0.0851655	0.0759482
1232	0.0776541	0.0734627	1232	0.0822496	0.0759339	1232	0.0851524	0.0763106
1233	0.0776744	0.0734103	1233	0.082171	0.0757527	1233	0.0846958	0.0769055
1234	0.0776768	0.0733399	1234	0.0824368	0.0757647	1234	0.0847197	0.0772488
1235	0.0775802	0.0733554	1235	0.0822961	0.076189	1235	0.0851727	0.0769556
1236	0.0775909	0.0734925	1236	0.0818837	0.0760615	1236	0.0852513	0.0769079
1237	0.0775695	0.0735068	1237	0.0819767	0.0762153	1237	0.0849891	0.0775886
1238	0.0775802	0.0736129	1238	0.082227	0.075947	1238	0.0850558	0.0771034
1239	0.077759	0.0737274	1239	0.0822508	0.0763357	1239	0.0849831	0.0766766
1240	0.0777769	0.0738204	1240	0.0821328	0.07635	1240	0.084914	0.0768483
1241	0.0777876	0.0737739	1241	0.082016	0.0764501	1241	0.0851035	0.0771046
1242	0.0776708	0.0736594	1242	0.0820804	0.0763226	1242	0.0850618	0.0769126
1243	0.0776589	0.0736701	1243	0.0820673	0.0764203	1243	0.0851119	0.0767672
1244	0.0777459	0.0737917	1244	0.0820196	0.0764477	1244	0.0852525	0.0769234
1245	0.0777626	0.0738502	1245	0.081867	0.0765181	1245	0.0851333	0.0768256
1246	0.07774	0.0738513	1246	0.0818932	0.0758505	1246	0.0853419	0.0769067
1247	0.0778818	0.0738633	1247	0.0821722	0.0764906	1247	0.0851965	0.076803
1248	0.0779045	0.0738561	1248	0.0821638	0.0763941	1248	0.0853491	0.0766623
1249	0.0779939	0.0739992	1249	0.082401	0.0762475	1249	0.0853169	0.0774097
1250	0.0779307	0.074054	1250	0.0823414	0.0765419	1250	0.0857365	0.0769663
1251	0.0779545	0.0741184	1251	0.082258	0.0761449	1251	0.0853074	0.0771797
1252	0.0779903	0.074178	1252	0.0820827	0.0760508	1252	0.0852251	0.0764835
1253	0.077914	0.0741351	1253	0.0818384	0.0762188	1253	0.0852859	0.0775623
1254	0.0780106	0.0741386	1254	0.0815785	0.0762761	1254	0.0855732	0.0767958
1255	0.0781083	0.0740886	1255	0.0812495	0.0761247	1255	0.0856888	0.0766063
1256	0.0781739	0.0740647	1256	0.0812829	0.0761223	1256	0.0859046	0.076946
1257	0.0781703	0.0740886	1257	0.0809538	0.0760317	1257	0.0857413	0.0780976
1258	0.0780606	0.0740385	1258	0.0812149	0.0757277	1258	0.0852084	0.0771964
1259	0.0780606	0.0740159	1259	0.0811577	0.0760138	1259	0.0857556	0.0766122
1260	0.0780809	0.0739706	1260	0.0809109	0.0752401	1260	0.0854826	0.0772059
1261	0.0780714	0.0739813	1261	0.0807858	0.0755608	1261	0.0854981	0.0764275
1262	0.0781286	0.074048	1262	0.0812173	0.0755978	1262	0.0852597	0.0769866
1263	0.078218	0.0741482	1263	0.0812209	0.075624	1263	0.0849116	0.0769508
1264	0.0782669	0.0740969	1264	0.0812781	0.0755167	1264	0.0850558	0.0767744
1265	0.0782728	0.0742102	1265	0.0810945	0.0752616	1265	0.0846827	0.077157
1266	0.0783944	0.0741303	1266	0.0811255	0.0754321	1266	0.0846505	0.0764
1267	0.0784886	0.074209	1267	0.0818801	0.0755155	1267	0.0849867	0.0763118
1268	0.0783861	0.0742304	1268	0.0820291	0.0760758	1268	0.0850534	0.0764525
1269	0.0782895	0.0741637	1269	0.0820673	0.0753534	1269	0.085175	0.0767446
1270	0.0783074	0.0742519	1270	0.0819921	0.0757754	1270	0.0848448	0.0769567
1271	0.0784183	0.0741899	1271	0.0819135	0.0754845	1271	0.0848329	0.0777411
1272	0.0784051	0.0741899	1272	0.0819921	0.0757086	1272	0.0851202	0.0762606
1273	0.0782764	0.0741804	1273	0.0820625	0.075748	1273	0.0851381	0.0765276
1274	0.0782013	0.0742126	1274	0.082283	0.0755095	1274	0.0850534	0.0769699
1275	0.0782406	0.0741661	1275	0.0820971	0.075357	1275	0.0849831	0.0767422
1276	0.0782049	0.074172	1276	0.0820816	0.0759554	1276	0.0850844	0.0773203
1277	0.0781608	0.0743282	1277	0.0819099	0.0756645	1277	0.0850773	0.0754607
1278	0.0782406	0.0743222	1278	0.0819743	0.0760603	1278	0.085156	0.0756001
1279	0.0782371	0.0743783	1279	0.0818098	0.0755203	1279	0.0849855	0.0767338
1280	0.0782943	0.074451	1280	0.081805	0.0743675	1280	0.0853789	0.0755119
1281	0.0772274	0.0736725	1281	0.0821269	0.0756097	1281	0.0851476	0.077064
1282	0.0772333	0.0736868	1282	0.0820363	0.0763416	1282	0.0853968	0.0768077
1283	0.0773704	0.0737786	1283	0.0820518	0.0755084	1283	0.0851989	0.0774407
1284	0.077672	0.073843	1284	0.0818717	0.0753582	1284	0.0852275	0.0772095
1285	0.0779045	0.0737679	1285	0.0819385	0.0756729	1285	0.0851941	0.0770116
1286	0.0779784	0.0737929	1286	0.0818491	0.0758529	1286	0.0850582	0.0776005
1287	0.0779009	0.0737596	1287	0.0818098	0.076133	1287	0.0850582	0.0773823
1288	0.0779128	0.0736713	1288	0.0817776	0.0755489	1288	0.0849199	0.0778437
1289	0.0777876	0.0736856	1289	0.0817394	0.0759506	1289	0.0849116	0.0769436
1290	0.0779247	0.0737226	1290	0.0818241	0.0760734	1290	0.0850141	0.0772083
1291	0.0778258	0.0736582	1291	0.0818574	0.0755608	1291	0.0851953	0.0765526
1292	0.077846	0.0736105	1292	0.0821984	0.0760889	1292	0.0849509	0.0769186
1293	0.0777042	0.0735307	1293	0.0821137	0.0761104	1293	0.0850487	0.076853
1294	0.0775897	0.0735688	1294	0.0821126	0.0761998	1294	0.0854242	0.077529
1295	0.0776577	0.0735843	1295	0.081985	0.076195	1295	0.0851882	0.07599
1296	0.0776458	0.073458	1296	0.0822747	0.0759876	1296	0.0851309	0.0762749
1297	0.0776291	0.0734377	1297	0.0822937	0.075835	1297	0.0846946	0.0770509
1298	0.0776017	0.073359	1298	0.0825799	0.0757599	1298	0.0847149	0.0773513
1299	0.0775373	0.0733125	1299	0.0822759	0.0761175	1299	0.0851202	0.0769627
1300	0.0776041	0.0734437	1300	0.0819612	0.0759745	1300	0.0852084	0.0768483
1301	0.0775397	0.0735545	1301	0.0820136	0.0762665	1301	0.0849605	0.0776231
1302	0.0775874	0.0736892	1302	0.0823009	0.0760806	1302	0.0852025	0.0771391
1303	0.0776815	0.0737202	1303	0.0822926	0.0762641	1303	0.0850677	0.0767219
1304	0.0777054	0.0738013	1304	0.0822353	0.0764298	1304	0.0850558	0.0769651
1305	0.0777984	0.0737107	1305	0.0821579	0.0766337	1305	0.0852549	0.0773466
1306	0.077697	0.0737023	1306	0.082258	0.0762975	1306	0.0851834	0.0767732
1307	0.0776565	0.0737274	1307	0.0820839	0.076474	1307	0.0851989	0.0768578
1308	0.0777447	0.0738037	1308	0.0820529	0.0765324	1308	0.0853026	0.0769997
1309	0.0778258	0.0738609	1309	0.0819862	0.0766385	1309	0.0851893	0.0770211
1310	0.0778353	0.0738382	1310	0.0819552	0.0758231	1310	0.0853932	0.0769317
1311	0.0779521	0.0738418	1311	0.0821924	0.0765145	1311	0.0851583	0.0768411
1312	0.0780094	0.0738537	1312	0.0823319	0.0763881	1312	0.0853693	0.0766909
1313	0.0780571	0.0739324	1313	0.0824952	0.0762808	1313	0.0853467	0.077467
1314	0.0780141	0.0739908	1314	0.0822747	0.0766706	1314	0.0856173	0.0770771
1315	0.0781155	0.0740266	1315	0.0821126	0.0762022	1315	0.0852084	0.0772238
1316	0.0781381	0.0741649	1316	0.0819099	0.0760245	1316	0.0853455	0.0764322
1317	0.0780058	0.0742137	1317	0.0816333	0.0761807	1317	0.085218	0.0774467
1318	0.0780749	0.0741863	1318	0.0813043	0.0761747	1318	0.08551	0.0766468
1319	0.0781775	0.0741196	1319	0.0812042	0.0760174	1319	0.085603	0.0767195
1320	0.0782454	0.0740302	1320	0.0811672	0.0761712	1320	0.0857818	0.0767839
1321	0.0783157	0.074029	1321	0.080955	0.0760734	1321	0.0856054	0.0780344
1322	0.0782323	0.0740242	1322	0.0812864	0.0755537	1322	0.0852585	0.0771403
1323	0.0781453	0.0740445	1323	0.0809991	0.0761247	1323	0.0858057	0.0767732
1324	0.078094	0.0740361	1324	0.0809693	0.0753284	1324	0.0854933	0.077163
1325	0.0780785	0.0740516	1325	0.081023	0.0756478	1325	0.0853968	0.0763702
1326	0.0781405	0.07406	1326	0.0813019	0.0755858	1326	0.0852287	0.0769472
1327	0.0782442	0.0741792	1327	0.0813234	0.0756907	1327	0.0849843	0.0769901
1328	0.07828	0.0741196	1328	0.0812364	0.0754535	1328	0.0850642	0.076822
1329	0.0783205	0.0741732	1329	0.0812042	0.0753212	1329	0.0847423	0.0770974
1330	0.0784492	0.0741065	1330	0.0814116	0.075593	1330	0.0847399	0.0764561
1331	0.0784802	0.0741351	1331	0.0820613	0.0754321	1331	0.0850224	0.0762057
1332	0.0784385	0.0742352	1332	0.0820112	0.0759423	1332	0.0851142	0.0763559
1333	0.0783396	0.074209	1333	0.0819588	0.0753486	1333	0.085218	0.076797
1334	0.0783443	0.0742936	1334	0.0820553	0.0756145	1334	0.0848329	0.0769544
1335	0.0783575	0.0741804	1335	0.0818515	0.0754189	1335	0.0848448	0.0779259
1336	0.0783873	0.0741088	1336	0.0819981	0.0756896	1336	0.0851476	0.0763047
1337	0.0783074	0.0741243	1337	0.0820398	0.0758135	1337	0.085218	0.0766826
1338	0.0782061	0.0741696	1338	0.0821626	0.0754464	1338	0.0850868	0.0770175
1339	0.0781977	0.0741911	1339	0.0820851	0.0754428	1339	0.0850809	0.0766826
1340	0.0781357	0.0741982	1340	0.0821316	0.0760472	1340	0.085144	0.0771999
1341	0.0781453	0.0742936	1341	0.0819302	0.0756431	1341	0.0851703	0.0756228
1342	0.0782442	0.0743341	1342	0.0819767	0.0760555	1342	0.085187	0.0756335
1343	0.0782526	0.0743079	1343	0.0817645	0.0755668	1343	0.08497	0.0767481
1344	0.0782704	0.0743818	1344	0.0817227	0.074296	1344	0.0854743	0.0758052
1345	0.077287	0.0736761	1345	0.0820577	0.0754702	1345	0.0852513	0.0771451
1346	0.0771976	0.0736678	1346	0.0819731	0.0762832	1346	0.085299	0.0768769
1347	0.0773633	0.0737071	1347	0.0820804	0.0755095	1347	0.0852299	0.0775325
1348	0.0777328	0.0737667	1348	0.0818563	0.0753152	1348	0.0850654	0.0773323
1349	0.0778747	0.0737417	1349	0.0819826	0.0757289	1349	0.0851488	0.0769198
1350	0.0780058	0.073725	1350	0.0818098	0.07581	1350	0.0851464	0.0777531
1351	0.0779593	0.0737488	1351	0.0817573	0.0761211	1351	0.085032	0.0773978
1352	0.0779819	0.0736892	1352	0.0816667	0.0755847	1352	0.0849414	0.0779235
1353	0.07792	0.0736439	1353	0.0817633	0.075984	1353	0.0848675	0.0768447
1354	0.0779474	0.0736856	1354	0.0818241	0.0761855	1354	0.0849128	0.0770915
1355	0.0778091	0.0735915	1355	0.08196	0.0756145	1355	0.0851572	0.0766456
1356	0.0778913	0.0736177	1356	0.0821352	0.0761318	1356	0.0850666	0.0767326
1357	0.0778019	0.0736105	1357	0.0821066	0.0760925	1357	0.0851262	0.0768995
1358	0.0776935	0.0736523	1358	0.0820243	0.0760949	1358	0.0853932	0.077666
1359	0.0776541	0.0736332	1359	0.0819647	0.076282	1359	0.0852597	0.0761223
1360	0.0776362	0.073514	1360	0.0823033	0.0759876	1360	0.0850809	0.0762987
1361	0.0775826	0.0734508	1361	0.0823927	0.0759888	1361	0.0848675	0.0772035
1362	0.0775218	0.0733054	1362	0.082581	0.0757873	1362	0.0848055	0.0775218
1363	0.0774682	0.0733507	1363	0.0822866	0.0760818	1363	0.0851297	0.0770557
1364	0.0776434	0.0734723	1364	0.0820827	0.0760639	1364	0.0850749	0.0768554
1365	0.0775886	0.0735998	1365	0.0821078	0.0762451	1365	0.0849617	0.0775957
1366	0.0776708	0.073626	1366	0.0823152	0.0761998	1366	0.0852108	0.0771737
1367	0.0776565	0.0736582	1367	0.0822592	0.0762463	1367	0.085206	0.0766385
1368	0.0776422	0.0737178	1368	0.0822711	0.0764835	1368	0.0851691	0.0769675
1369	0.0777197	0.0737083	1369	0.0821424	0.0766897	1369	0.0852525	0.0775719
1370	0.0777435	0.0738013	1370	0.08232	0.0763428	1370	0.0851703	0.076735
1371	0.0777733	0.0737703	1371	0.082252	0.0764287	1371	0.0852776	0.0768197
1372	0.0778008	0.073818	1372	0.0821376	0.0765908	1372	0.0853455	0.0769877
1373	0.0778794	0.0738287	1373	0.0821269	0.0767982	1373	0.0851357	0.0772107
1374	0.0779176	0.0738358	1374	0.0820279	0.0758255	1374	0.0853789	0.0769365
1375	0.0780058	0.0738227	1375	0.0821972	0.0765157	1375	0.0849748	0.0768507
1376	0.0780797	0.0738287	1376	0.0824118	0.0763464	1376	0.0852406	0.0767553
1377	0.0781226	0.0738752	1377	0.0824988	0.0762522	1377	0.0853264	0.0773895
1378	0.07815	0.0739074	1378	0.0820792	0.0767493	1378	0.0854588	0.0771022
1379	0.0782287	0.0740099	1379	0.0819623	0.0762868	1379	0.0851798	0.0772929
1380	0.0782955	0.0741947	1380	0.0815797	0.0759923	1380	0.0853872	0.0765324
1381	0.0781691	0.0742114	1381	0.0814176	0.0761199	1381	0.0852191	0.0773334
1382	0.078249	0.0741148	1382	0.0811517	0.0762343	1382	0.0854886	0.0765812
1383	0.0782692	0.074054	1383	0.081166	0.0759101	1383	0.0854516	0.0767076
1384	0.0783169	0.0739372	1384	0.0811386	0.0762737	1384	0.085659	0.0767148
1385	0.0783849	0.0739717	1385	0.080992	0.0760424	1385	0.0854945	0.0779426
1386	0.0783479	0.0740445	1386	0.0812471	0.0754642	1386	0.0852251	0.077219
1387	0.078299	0.0740659	1387	0.0810611	0.076102	1387	0.0857675	0.0767112
1388	0.0781786	0.0740802	1388	0.081135	0.0753438	1388	0.0854933	0.0770783
1389	0.0781977	0.0740349	1389	0.0812554	0.0757897	1389	0.0852382	0.0763392
1390	0.0781643	0.0740659	1390	0.0813711	0.0755751	1390	0.085156	0.0768304
1391	0.0783145	0.074178	1391	0.0812984	0.0756359	1391	0.0848997	0.0769079
1392	0.0782645	0.0741613	1392	0.0812304	0.0754726	1392	0.0851214	0.0769687
1393	0.0783169	0.0741315	1393	0.0813413	0.0754189	1393	0.084753	0.076921
1394	0.078516	0.0741422	1394	0.0816655	0.0756192	1394	0.0848031	0.0765467
1395	0.078485	0.0741005	1395	0.082109	0.0754583	1395	0.0850654	0.0762439
1396	0.0784552	0.0742412	1396	0.0819075	0.0759506	1396	0.0850034	0.0762451
1397	0.078392	0.0742435	1397	0.0818443	0.0752151	1397	0.0852025	0.0768471
1398	0.0783587	0.0742388	1398	0.0820005	0.0755322	1398	0.0849724	0.0768626
1399	0.0783563	0.0741649	1399	0.0818622	0.0753891	1399	0.0849521	0.0779784
1400	0.0783265	0.0740814	1400	0.0819266	0.0757027	1400	0.0851643	0.0763261
1401	0.0783134	0.0741446	1401	0.0820029	0.0758839	1401	0.0851941	0.0768876
1402	0.0782096	0.0742042	1402	0.0821292	0.0753748	1402	0.0851285	0.077126
1403	0.0782335	0.0742126	1403	0.0821173	0.0754917	1403	0.0851023	0.0766599
1404	0.0781786	0.0742471	1404	0.0821292	0.076077	1404	0.0850785	0.0769114
1405	0.0781536	0.0742388	1405	0.0818408	0.0756216	1405	0.0851715	0.0757146
1406	0.0782228	0.0743139	1406	0.0819254	0.0759876	1406	0.085206	0.0755906
1407	0.0782394	0.0742793	1407	0.0817025	0.0756133	1407	0.0848973	0.0766826
1408	0.0783122	0.074358	1408	0.0815749	0.0743651	1408	0.0855064	0.0760627
1409	0.0773346	0.073638	1409	0.0820887	0.0754356	1409	0.0853634	0.0771987
1410	0.0772727	0.073626	1410	0.0819314	0.0761914	1410	0.0853026	0.0769222
1411	0.0774062	0.0736332	1411	0.0821757	0.0755465	1411	0.085156	0.0777256
1412	0.0776684	0.0736642	1412	0.0819707	0.0752842	1412	0.0849855	0.0774705
1413	0.0778699	0.0736952	1413	0.0819969	0.0758362	1413	0.0851095	0.0768244
1414	0.0779247	0.0737762	1414	0.0817287	0.0758159	1414	0.0852013	0.0778365
1415	0.0779951	0.0737441	1415	0.0817251	0.0761235	1415	0.0850391	0.0772202
1416	0.0780571	0.0736654	1416	0.0816953	0.0755131	1416	0.0849831	0.0780284
1417	0.0779891	0.0736046	1417	0.0817835	0.0758994	1417	0.0847924	0.076884
1418	0.0779331	0.0736761	1418	0.0818694	0.0762534	1418	0.0848079	0.0770342
1419	0.0778353	0.0736558	1419	0.0820923	0.0757039	1419	0.0851965	0.0766981
1420	0.0779247	0.0736916	1420	0.082022	0.0761282	1420	0.0852323	0.076648
1421	0.0778651	0.07375	1421	0.0820231	0.0759816	1421	0.0852549	0.076946
1422	0.0777626	0.0737011	1422	0.0819612	0.0760615	1422	0.0853145	0.0778341
1423	0.0777733	0.0736976	1423	0.0820863	0.076344	1423	0.0853789	0.0763154
1424	0.0776315	0.0735903	1424	0.0823069	0.0759637	1424	0.085113	0.0762355
1425	0.0775719	0.0734484	1425	0.0823438	0.0760472	1425	0.0850153	0.0772154
1426	0.0775123	0.0733614	1426	0.0825119	0.0757897	1426	0.0849879	0.0774717
1427	0.0774848	0.0734568	1427	0.0823176	0.0760794	1427	0.0851214	0.077157
1428	0.0776172	0.0735462	1428	0.0822675	0.0761485	1428	0.0849509	0.0768661
1429	0.0776267	0.0736189	1429	0.0823426	0.0762177	1429	0.0849557	0.0775039
1430	0.0776923	0.073601	1430	0.0823712	0.07617	1430	0.0852144	0.077194
1431	0.0776875	0.0736129	1431	0.0822222	0.0762641	1431	0.0852597	0.076642
1432	0.0776732	0.0737059	1432	0.0822783	0.0765026	1432	0.085243	0.0771117
1433	0.0776565	0.0736904	1433	0.0821757	0.0766206	1433	0.0852013	0.0776005
1434	0.0777781	0.0738204	1434	0.0822878	0.0762844	1434	0.0852275	0.0768054
1435	0.0778377	0.0737989	1435	0.0825	0.0763893	1435	0.0853121	0.0768733
1436	0.0779164	0.073787	1436	0.0822794	0.0766027	1436	0.0853598	0.0769877
1437	0.0779223	0.0738001	1437	0.0822914	0.0768745	1437	0.0851464	0.0773585
1438	0.0779486	0.0737965	1438	0.0822127	0.0759685	1438	0.0854385	0.0771117
1439	0.0780487	0.0738204	1439	0.0822139	0.076499	1439	0.0849223	0.0768471
1440	0.0781608	0.0738251	1440	0.0824022	0.0763297	1440	0.0852215	0.0767589
1441	0.0781131	0.0738239	1441	0.0823116	0.0761557	1441	0.0852323	0.0773323
1442	0.0782681	0.0738776	1442	0.0818753	0.0767827	1442	0.0852454	0.077101
1443	0.0783575	0.0740135	1443	0.0817418	0.0763869	1443	0.0851738	0.0773561
1444	0.078429	0.0740969	1444	0.0812721	0.0759971	1444	0.0852919	0.0765872
1445	0.0783193	0.074122	1445	0.0812066	0.0759542	1445	0.08533	0.0773728
1446	0.0784266	0.0740147	1446	0.0810456	0.0761747	1446	0.0854766	0.0765204
1447	0.078398	0.0739813	1447	0.0811768	0.0759113	1447	0.085299	0.0766718
1448	0.0783849	0.0739479	1448	0.0811458	0.0762773	1448	0.0855291	0.0766301
1449	0.0784278	0.0739574	1449	0.0811207	0.0760758	1449	0.0855589	0.0778127
1450	0.0784278	0.074079	1450	0.081228	0.0755501	1450	0.0852096	0.0771177
1451	0.0784099	0.0741291	1451	0.0811946	0.07604	1451	0.0856841	0.0767314
1452	0.0783205	0.0740993	1452	0.0813043	0.0754023	1452	0.0853062	0.0770068
1453	0.0783122	0.0740719	1453	0.0813806	0.0759041	1453	0.0850654	0.0763333
1454	0.0783241	0.0741279	1454	0.0813878	0.0756323	1454	0.0851488	0.076766
1455	0.0783491	0.0741887	1455	0.0811946	0.0755751	1455	0.0849485	0.0770164
1456	0.0782907	0.074141	1456	0.081296	0.0755012	1456	0.0851488	0.0768638
1457	0.0783038	0.074147	1457	0.0815511	0.0755608	1457	0.0847244	0.0768387
1458	0.0784981	0.0741971	1458	0.0818467	0.0755382	1458	0.0848222	0.0767195
1459	0.0784624	0.0741565	1459	0.0820339	0.0754583	1459	0.0849688	0.0764489
1460	0.0784194	0.0742066	1460	0.0817645	0.0760305	1460	0.08497	0.076319
1461	0.0783443	0.074209	1461	0.0817335	0.0751793	1461	0.085212	0.0768828
1462	0.0783396	0.0742066	1462	0.081954	0.0754666	1462	0.0851226	0.0767267
1463	0.0784051	0.0741935	1463	0.0818396	0.0754213	1463	0.0850034	0.0779176
1464	0.0783241	0.0741374	1464	0.0819469	0.0758243	1464	0.0851178	0.0763214
1465	0.0782764	0.0741458	1465	0.0819385	0.0758696	1465	0.0851667	0.0769079
1466	0.0782287	0.0742185	1466	0.0821447	0.0752258	1466	0.0851119	0.0771248
1467	0.0782669	0.0742567	1467	0.0820708	0.0755286	1467	0.0850534	0.076685
1468	0.0782192	0.0741911	1468	0.0820768	0.0759912	1468	0.0850093	0.0766134
1469	0.0781369	0.0742114	1469	0.081836	0.0757027	1469	0.0851178	0.07568
1470	0.0781643	0.0741911	1470	0.0819325	0.07586	1470	0.0851154	0.0756109
1471	0.0781667	0.0742579	1471	0.0815904	0.0756574	1471	0.0848746	0.0766098
1472	0.0782776	0.074352	1472	0.0815272	0.0745165	1472	0.0854039	0.0762761
1473	0.0773621	0.0736392	1473	0.082047	0.075413	1473	0.0854754	0.0771904
1474	0.0773501	0.0735486	1474	0.0819123	0.0762057	1474	0.0852549	0.0769722
1475	0.0774682	0.0735819	1475	0.0822103	0.0755787	1475	0.0850308	0.0777531
1476	0.0776529	0.0736225	1476	0.0820398	0.0752664	1476	0.085007	0.07761
1477	0.0778186	0.0737178	1477	0.0819457	0.07586	1477	0.0851071	0.0768244
1478	0.0778675	0.0737965	1478	0.0817335	0.0758541	1478	0.0852752	0.0777698
1479	0.0780046	0.0737667	1479	0.0817299	0.0761759	1479	0.0851023	0.0770497
1480	0.0781	0.0737214	1480	0.0817883	0.0755191	1480	0.0850081	0.0780058
1481	0.0780344	0.0736797	1481	0.0819242	0.0759208	1481	0.0846946	0.0769973
1482	0.0779951	0.0736809	1482	0.0818861	0.0761557	1482	0.0849116	0.0771117
1483	0.077914	0.0737882	1483	0.0821555	0.0756788	1483	0.0852299	0.0766778
1484	0.0779486	0.0738072	1484	0.081923	0.0760257	1484	0.0854158	0.0765634
1485	0.0779355	0.0738287	1485	0.0819278	0.0759625	1485	0.0852907	0.0770354
1486	0.077846	0.0737619	1486	0.082022	0.0761151	1486	0.085324	0.0778449
1487	0.0778806	0.0737989	1487	0.082233	0.0763297	1487	0.0854623	0.0764358
1488	0.077697	0.0736535	1488	0.0822759	0.0758541	1488	0.085206	0.0762224
1489	0.0775647	0.0735044	1489	0.0822663	0.0761259	1489	0.0851619	0.0772917
1490	0.0775337	0.0734961	1490	0.0824118	0.0758767	1490	0.0851297	0.0774026
1491	0.0775218	0.0736117	1491	0.0824022	0.0761104	1491	0.0850797	0.0773191
1492	0.0776696	0.0736058	1492	0.0825179	0.0762677	1492	0.08497	0.0769651
1493	0.0776327	0.0736117	1493	0.0824761	0.0762951	1493	0.0849628	0.0775504
1494	0.077709	0.0736499	1494	0.0824201	0.0759947	1494	0.0853145	0.0771654
1495	0.0777125	0.0736284	1495	0.0821733	0.0762737	1495	0.0852442	0.0766778
1496	0.0777495	0.0736582	1496	0.0823259	0.0765061	1496	0.0852823	0.0770736
1497	0.0777102	0.0736928	1497	0.0822222	0.0765824	1497	0.0852036	0.0775754
1498	0.0777626	0.0738156	1498	0.0822651	0.0763059	1498	0.0854015	0.0769305
1499	0.0778711	0.0738204	1499	0.082618	0.0762999	1499	0.0853717	0.0770247
1500	0.0779724	0.073806	1500	0.0824308	0.0765359	1500	0.0853431	0.0769973
1501	0.0779843	0.0738108	1501	0.0822926	0.0767529	1501	0.0851917	0.0775278
1502	0.0780261	0.0737834	1502	0.0822723	0.0762093	1502	0.085398	0.0771928
1503	0.0780964	0.0737834	1503	0.0822556	0.0764859	1503	0.0849271	0.076884
1504	0.078212	0.0738347	1504	0.0822508	0.0762951	1504	0.0852072	0.0767398
1505	0.0782287	0.0738275	1505	0.082196	0.0761366	1505	0.0852191	0.0773072
1506	0.0783408	0.0738394	1506	0.0816822	0.0767577	1506	0.0851476	0.0772059
1507	0.078404	0.0739217	1507	0.0814998	0.0762832	1507	0.0850916	0.0773716
1508	0.0785089	0.0739098	1508	0.0810575	0.0760889	1508	0.0853026	0.0766575
1509	0.0784564	0.0739765	1509	0.0811398	0.0758636	1509	0.0854194	0.0772977
1510	0.0785363	0.0738907	1510	0.0809789	0.076021	1510	0.0855219	0.0765598
1511	0.078541	0.0739503	1511	0.0812948	0.0758171	1511	0.0851631	0.0766504
1512	0.0784934	0.0739372	1512	0.0811541	0.0762177	1512	0.0854707	0.0765717
1513	0.0784957	0.0739729	1513	0.0812244	0.0761545	1513	0.0854182	0.0776839
1514	0.0785089	0.0740433	1514	0.0813711	0.0757086	1514	0.0851309	0.0770843
1515	0.0784791	0.0741065	1515	0.081358	0.0761747	1515	0.0854886	0.0767326
1516	0.0784659	0.074116	1516	0.0814354	0.0754869	1516	0.0852382	0.0769997
1517	0.0784552	0.0740874	1517	0.0814354	0.0759923	1517	0.0849473	0.0763202
1518	0.078553	0.0741184	1518	0.0813103	0.0756919	1518	0.0851989	0.0766754
1519	0.0784492	0.0741148	1519	0.0811636	0.0755227	1519	0.0849962	0.0771105
1520	0.0783539	0.0741291	1520	0.0812733	0.0755203	1520	0.0851238	0.0767994
1521	0.0783038	0.0741887	1521	0.081805	0.0755668	1521	0.0847328	0.0767374
1522	0.0784695	0.0742304	1522	0.0818968	0.0754786	1522	0.0849104	0.0768828
1523	0.0783908	0.0741935	1523	0.0819719	0.0754774	1523	0.0850224	0.0765789
1524	0.0783741	0.0741923	1524	0.0817442	0.0760841	1524	0.085026	0.0765181
1525	0.0783479	0.0741851	1525	0.0816834	0.0752127	1525	0.0852144	0.0769055
1526	0.078361	0.074203	1526	0.0818646	0.0754857	1526	0.0852823	0.0767386
1527	0.0784457	0.0741875	1527	0.0818765	0.0754499	1527	0.0850558	0.07779
1528	0.078392	0.0742102	1528	0.0819302	0.0758564	1528	0.0851011	0.0763392
1529	0.0782335	0.0741982	1529	0.0820637	0.0758433	1529	0.0851464	0.0768888
1530	0.0781846	0.0742042	1530	0.0821173	0.0751674	1530	0.0850797	0.0771165
1531	0.0782537	0.0741553	1531	0.082041	0.0755644	1531	0.084995	0.0767243
1532	0.0782239	0.0741637	1532	0.0819898	0.0758588	1532	0.084995	0.0764787
1533	0.0781369	0.0741863	1533	0.0818551	0.0757718	1533	0.0850642	0.0756645
1534	0.0781131	0.0741971	1534	0.0819385	0.0757611	1534	0.0850725	0.0756729
1535	0.0781262	0.0742292	1535	0.0814617	0.0756311	1535	0.0850081	0.0765991
1536	0.0781798	0.0743425	1536	0.0814903	0.0746143	1536	0.0854063	0.076474
1537	0.0773621	0.0735581	1537	0.0820208	0.075382	1537	0.0854719	0.0772333
1538	0.0773799	0.0734568	1538	0.081954	0.076189	1538	0.0852942	0.077014
1539	0.0774634	0.0735307	1539	0.0822508	0.0755727	1539	0.0849915	0.0777209
1540	0.0776601	0.0736058	1540	0.0821078	0.0752521	1540	0.0850701	0.077709
1541	0.0777721	0.0737119	1541	0.0819266	0.0759339	1541	0.0850439	0.0768054
1542	0.0777769	0.0737691	1542	0.0818932	0.075829	1542	0.0853014	0.0778186
1543	0.0779521	0.0737345	1543	0.0817609	0.0762486	1543	0.0851667	0.077014
1544	0.0781083	0.0737321	1544	0.0818872	0.0755918	1544	0.0850081	0.0779068
1545	0.078069	0.073756	1545	0.0820398	0.0759959	1545	0.0846767	0.0770688
1546	0.0780475	0.0737655	1546	0.0819504	0.0760412	1546	0.0850832	0.0771666
1547	0.0780571	0.0738001	1547	0.0821757	0.075624	1547	0.085187	0.0767434
1548	0.0780594	0.0738299	1548	0.0818908	0.0758863	1548	0.0853407	0.0764668
1549	0.0779927	0.0738776	1549	0.0819647	0.0759745	1549	0.0852966	0.0771236
1550	0.0778925	0.0738883	1550	0.08214	0.0761735	1550	0.0853157	0.0777745
1551	0.0779247	0.0738585	1551	0.0822866	0.0762963	1551	0.0854683	0.076524
1552	0.0777507	0.0736761	1552	0.0821638	0.0756776	1552	0.0852621	0.0763273
1553	0.0777245	0.0736642	1553	0.0822186	0.0761974	1553	0.0853169	0.0773048
1554	0.07761	0.0736523	1554	0.0824046	0.0758421	1554	0.0852478	0.0773942
1555	0.0775647	0.0736713	1555	0.0824404	0.0761485	1555	0.0850892	0.0774837
1556	0.0777388	0.0736368	1556	0.0826168	0.0764179	1556	0.0850487	0.0770462
1557	0.0776434	0.0735962	1557	0.0824428	0.0763631	1557	0.085119	0.0776136
1558	0.077734	0.0736928	1558	0.0824702	0.0758886	1558	0.0853801	0.0772583
1559	0.0777411	0.0736308	1559	0.0821531	0.0762022	1559	0.0852609	0.076679
1560	0.0778067	0.0736403	1560	0.0823057	0.0765264	1560	0.0853693	0.0770879
1561	0.0778508	0.0736678	1561	0.0822985	0.0766146	1561	0.0852835	0.0775206
1562	0.0777948	0.0737727	1562	0.0823069	0.0763011	1562	0.085485	0.0770104
1563	0.0779009	0.0738513	1563	0.0825655	0.0762594	1563	0.0853348	0.0770307
1564	0.0779533	0.0738263	1564	0.0824571	0.0764775	1564	0.0853455	0.0768852
1565	0.0779748	0.0737691	1565	0.082258	0.0766873	1565	0.0852251	0.0776505
1566	0.078038	0.073756	1566	0.0823843	0.076381	1566	0.0852942	0.0769591
1567	0.0781763	0.0737703	1567	0.0822151	0.0763929	1567	0.0850904	0.0769639
1568	0.0782418	0.0738394	1568	0.0821424	0.0763929	1568	0.0852239	0.0768387
1569	0.0781882	0.0738335	1569	0.082072	0.076158	1569	0.0852811	0.0772691
1570	0.0783777	0.0737882	1570	0.0815237	0.0765967	1570	0.0850642	0.0773907
1571	0.078429	0.0738573	1571	0.0812912	0.0761724	1571	0.0850058	0.0773096
1572	0.0785613	0.0737917	1572	0.0809789	0.0760448	1572	0.0853419	0.0766563
1573	0.0785124	0.0739515	1573	0.0811708	0.0758851	1573	0.0854099	0.0772023
1574	0.0786936	0.0738692	1574	0.0810599	0.0759292	1574	0.0854361	0.0766122
1575	0.0786245	0.0739181	1575	0.081315	0.075767	1575	0.0850177	0.0766289
1576	0.0785971	0.0739276	1576	0.0812042	0.0761175	1576	0.0853086	0.0764775
1577	0.0786376	0.0739217	1577	0.0813031	0.0762129	1577	0.0852704	0.0774574
1578	0.0786018	0.074023	1578	0.0815797	0.0758147	1578	0.0850713	0.0769997
1579	0.0785291	0.074079	1579	0.0814617	0.0762522	1579	0.0853324	0.0767672
1580	0.0785089	0.0741315	1580	0.0815141	0.0756609	1580	0.0851941	0.0770617
1581	0.0784957	0.0740564	1581	0.0814998	0.0760627	1581	0.0849259	0.0763488
1582	0.07864	0.0741601	1582	0.0812805	0.0756717	1582	0.0851524	0.0767362
1583	0.07851	0.0741303	1583	0.0812006	0.0756145	1583	0.0850141	0.0770581
1584	0.0784028	0.0741243	1584	0.0813985	0.0756228	1584	0.085057	0.076853
1585	0.0783134	0.0742435	1585	0.0818634	0.0755417	1585	0.0847268	0.0768018
1586	0.0784338	0.0742352	1586	0.0818551	0.0754702	1586	0.0849676	0.0770891
1587	0.0783348	0.0741529	1587	0.0820255	0.0754547	1587	0.0849509	0.0767279
1588	0.0783873	0.0741422	1588	0.0817513	0.0761461	1588	0.0850677	0.0766671
1589	0.0783455	0.0741041	1589	0.0816786	0.0754213	1589	0.0851572	0.0769293
1590	0.0783932	0.0741971	1590	0.0817978	0.0754964	1590	0.0854456	0.076834
1591	0.0784564	0.0742197	1591	0.0819063	0.0754225	1591	0.0851405	0.0776982
1592	0.0783706	0.0742233	1592	0.0819027	0.0759363	1592	0.085094	0.0764632
1593	0.0782919	0.0742364	1593	0.0821972	0.0758457	1593	0.0851059	0.0768173
1594	0.0781977	0.074234	1594	0.0820601	0.0751352	1594	0.0850332	0.0770843
1595	0.0782394	0.0741732	1595	0.0820339	0.0755608	1595	0.0849426	0.0768292
1596	0.0781763	0.0741506	1596	0.0820625	0.0757825	1596	0.0849509	0.0764692
1597	0.0781035	0.0741649	1597	0.0818944	0.0758648	1597	0.0850403	0.0758028
1598	0.0781608	0.0741708	1598	0.0819528	0.0757563	1598	0.0850809	0.0758028
1599	0.0780618	0.074265	1599	0.0814366	0.0755537	1599	0.0851393	0.0766301
1600	0.078088	0.0743186	1600	0.0815558	0.0746965	1600	0.0853419	0.0765252
1601	0.0773585	0.0734591	1601	0.0820482	0.0753379	1601	0.0854659	0.0772119
1602	0.0772905	0.0734425	1602	0.0820518	0.0761795	1602	0.0852776	0.0770485
1603	0.0775003	0.0735152	1603	0.0820684	0.0756824	1603	0.085063	0.0776649
1604	0.0776541	0.0736105	1604	0.0821126	0.0751543	1604	0.0851166	0.0778151
1605	0.0778151	0.073657	1605	0.0819421	0.0760198	1605	0.0850677	0.0767803
1606	0.0776958	0.0737166	1606	0.081991	0.0757766	1606	0.0853455	0.0777376
1607	0.0778401	0.0737095	1607	0.081836	0.0762725	1607	0.0852787	0.0771296
1608	0.0780225	0.0737965	1608	0.0819623	0.0757408	1608	0.0851357	0.0778234
1609	0.0780678	0.0738418	1609	0.0820971	0.0759947	1609	0.0847936	0.0769854
1610	0.078162	0.0738144	1610	0.0819349	0.0760114	1610	0.0851226	0.0771391
1611	0.0781953	0.0738108	1611	0.0821841	0.0755751	1611	0.0850904	0.0768936
1612	0.078131	0.0738716	1612	0.0818348	0.0756729	1612	0.0853097	0.0765014
1613	0.0780571	0.0738728	1613	0.0820875	0.0759041	1613	0.0853992	0.077188
1614	0.077939	0.0739086	1614	0.0822091	0.0760853	1614	0.0853074	0.0776196
1615	0.0779235	0.0739038	1615	0.0822556	0.0763786	1615	0.0853229	0.0765622
1616	0.0777996	0.0738442	1616	0.0821555	0.075531	1616	0.0852609	0.0763941
1617	0.0778496	0.0738049	1617	0.0822258	0.0762177	1617	0.0852621	0.0772989
1618	0.0777388	0.0737429	1618	0.082339	0.0757945	1618	0.0853276	0.0774086
1619	0.077672	0.0737298	1619	0.0824511	0.0761521	1619	0.0851703	0.0775743
1620	0.0777757	0.0736272	1620	0.0824761	0.076462	1620	0.0851595	0.0770032
1621	0.0776446	0.073694	1621	0.082376	0.0763702	1621	0.0852191	0.077666
1622	0.0777555	0.0736868	1622	0.0823796	0.0757229	1622	0.0853145	0.0774825
1623	0.0777662	0.073663	1623	0.08201	0.0761545	1623	0.0851619	0.0768125
1624	0.0778162	0.0736761	1624	0.0822258	0.0764096	1624	0.08551	0.0771475
1625	0.0779176	0.0736594	1625	0.0823975	0.07658	1625	0.0853634	0.0772679
1626	0.0778568	0.0737917	1626	0.0824356	0.0763619	1626	0.085448	0.0769377
1627	0.0779891	0.0737858	1627	0.0825417	0.0761807	1627	0.0852561	0.0771344
1628	0.077976	0.0738275	1628	0.0824714	0.0764215	1628	0.0853205	0.0768387
1629	0.0779736	0.0736988	1629	0.0823176	0.0766408	1629	0.085175	0.0777066
1630	0.0780809	0.073719	1630	0.0823522	0.0765681	1630	0.0853014	0.0767231
1631	0.0782418	0.0737822	1631	0.0821018	0.0763476	1631	0.0852966	0.0769222
1632	0.0783372	0.0738323	1632	0.082072	0.076468	1632	0.0853503	0.076803
1633	0.0782299	0.0738215	1633	0.0819969	0.0760317	1633	0.0853205	0.0772643
1634	0.0783682	0.0737858	1634	0.0813723	0.0764549	1634	0.0851154	0.0775278
1635	0.0784266	0.0737941	1635	0.0811601	0.0761449	1635	0.0850308	0.0773203
1636	0.078491	0.0737846	1636	0.080961	0.0760925	1636	0.0853252	0.076412
1637	0.0785351	0.0739121	1637	0.0812936	0.075829	1637	0.0853586	0.0769973
1638	0.0787354	0.0739121	1638	0.0812495	0.0758171	1638	0.0853884	0.0767481
1639	0.0786769	0.0738704	1639	0.0813019	0.0756836	1639	0.0849712	0.0766897
1640	0.0786889	0.073911	1640	0.0812781	0.0760698	1640	0.0851011	0.0764215
1641	0.0787091	0.0739455	1641	0.0813782	0.0761282	1641	0.0851262	0.077306
1642	0.0786829	0.0740039	1642	0.081706	0.0758874	1642	0.0851357	0.0768983
1643	0.0785625	0.0740576	1643	0.0816131	0.0763106	1643	0.085268	0.0767827
1644	0.0785053	0.0740981	1644	0.0815678	0.0757885	1644	0.0851572	0.0770712
1645	0.0783885	0.07406	1645	0.0815082	0.0761211	1645	0.0848699	0.0766146
1646	0.0785148	0.0741327	1646	0.0813341	0.0756693	1646	0.0850737	0.0768566
1647	0.0785267	0.0741625	1647	0.0813127	0.0757372	1647	0.0850666	0.0770509
1648	0.0784624	0.0741208	1648	0.0815535	0.0758362	1648	0.0850296	0.0767612
1649	0.078373	0.0742984	1649	0.0818741	0.0755501	1649	0.0848579	0.0769019
1650	0.0784063	0.0742185	1650	0.0818932	0.0754702	1650	0.0851583	0.0772905
1651	0.0783086	0.074147	1651	0.0820208	0.0753915	1651	0.0849843	0.0768852
1652	0.0783455	0.0741196	1652	0.0818145	0.0762224	1652	0.0851834	0.0767386
1653	0.0782979	0.0741088	1653	0.0816727	0.0756049	1653	0.0851703	0.076952
1654	0.0783837	0.0741696	1654	0.0817466	0.0755405	1654	0.08551	0.0768709
1655	0.0783837	0.0741768	1655	0.0819492	0.0754583	1655	0.0852084	0.0776935
1656	0.078336	0.0742388	1656	0.0819421	0.0759923	1656	0.0849962	0.0765622
1657	0.0782323	0.0742316	1657	0.0821841	0.0758767	1657	0.0850391	0.0767422
1658	0.0782347	0.074271	1658	0.0819802	0.075233	1658	0.0850117	0.0770593
1659	0.0782275	0.0741851	1659	0.0820327	0.0755394	1659	0.0849795	0.0768626
1660	0.0781548	0.0741053	1660	0.082165	0.0758016	1660	0.0849855	0.0764918
1661	0.0781059	0.0741756	1661	0.0819445	0.0758374	1661	0.0851429	0.0759065
1662	0.0781548	0.0742066	1662	0.0818229	0.0757349	1662	0.0851178	0.075953
1663	0.0781476	0.0742102	1663	0.0813866	0.0756145	1663	0.0852084	0.0766349
1664	0.0780368	0.0741923	1664	0.0817955	0.0747037	1664	0.0852358	0.0765371
1665	0.0773859	0.0734246	1665	0.08214	0.0753105	1665	0.0853336	0.077157
1666	0.0772095	0.0734782	1666	0.0820971	0.0761354	1666	0.085212	0.07707
1667	0.0774622	0.0735259	1667	0.0818241	0.0757372	1667	0.0852108	0.0775516
1668	0.0775945	0.0735986	1668	0.0820708	0.0751293	1668	0.0852096	0.07792
1669	0.0777853	0.0736356	1669	0.0819135	0.0760138	1669	0.0850976	0.0768316
1670	0.0777066	0.0737	1670	0.0820243	0.0756645	1670	0.0853503	0.0776112
1671	0.0777483	0.0737584	1671	0.0819123	0.0762141	1671	0.0853431	0.0772262
1672	0.077914	0.0738358	1672	0.0819814	0.0758648	1672	0.0851929	0.0777888
1673	0.0780153	0.0739038	1673	0.0820935	0.0759852	1673	0.085026	0.0770187
1674	0.0781488	0.0738871	1674	0.0819528	0.0760186	1674	0.0850987	0.0769734
1675	0.0782382	0.0738263	1675	0.082165	0.0756168	1675	0.0849521	0.0770187
1676	0.0781703	0.0739205	1676	0.0819302	0.0755477	1676	0.0853288	0.0765586
1677	0.0781631	0.0738406	1677	0.0821161	0.0758111	1677	0.0853658	0.0772202
1678	0.0779748	0.0739288	1678	0.0822318	0.0760353	1678	0.0853717	0.0774825
1679	0.0779819	0.0740135	1679	0.082171	0.0764871	1679	0.0851798	0.0765824
1680	0.0778437	0.0739229	1680	0.0822377	0.0755203	1680	0.0851691	0.0764561
1681	0.0779212	0.0738931	1681	0.08214	0.0761878	1681	0.0852096	0.0774086
1682	0.077877	0.073756	1682	0.0822628	0.0757563	1682	0.085355	0.0773621
1683	0.0778484	0.0737739	1683	0.0824296	0.0760746	1683	0.0852168	0.0776613
1684	0.0778544	0.07375	1684	0.0823963	0.0763917	1684	0.0853145	0.0768769
1685	0.0776935	0.0737464	1685	0.0822639	0.0764251	1685	0.0853527	0.0777149
1686	0.0777447	0.0737226	1686	0.0821972	0.0757313	1686	0.0853372	0.0775731
1687	0.0777233	0.0737262	1687	0.0819969	0.076189	1687	0.0851405	0.0769341
1688	0.0778663	0.0736594	1688	0.0822318	0.0763106	1688	0.0856388	0.0771892
1689	0.078001	0.0736558	1689	0.0824749	0.0765347	1689	0.0854242	0.0771344
1690	0.0779808	0.0737381	1690	0.0823867	0.0763571	1690	0.0855112	0.0767255
1691	0.0781417	0.0737286	1691	0.0824356	0.0762045	1691	0.0851703	0.0771689
1692	0.0780511	0.0738561	1692	0.0824714	0.0764275	1692	0.0852931	0.0769103
1693	0.0780368	0.0737178	1693	0.0823069	0.0766242	1693	0.0851476	0.0777411
1694	0.0781095	0.0737429	1694	0.082221	0.0765979	1694	0.0853252	0.0767124
1695	0.0782716	0.0737798	1695	0.0818491	0.0763404	1695	0.0854456	0.0768805
1696	0.078305	0.0737727	1696	0.0818789	0.0764596	1696	0.0853395	0.0767362
1697	0.0782645	0.0738096	1697	0.0818813	0.0759566	1697	0.0853038	0.0771785
1698	0.0783944	0.0737691	1698	0.0812316	0.0763702	1698	0.0850928	0.0775754
1699	0.0783968	0.0737882	1699	0.0811517	0.0761306	1699	0.0851512	0.0772727
1700	0.0784528	0.0738204	1700	0.0811076	0.0761533	1700	0.0853014	0.0760627
1701	0.0784695	0.0739503	1701	0.081408	0.0757599	1701	0.0853014	0.0769031
1702	0.0786376	0.0739777	1702	0.0813985	0.0758946	1702	0.085218	0.0767803
1703	0.0786495	0.0738788	1703	0.0813353	0.0756812	1703	0.0849819	0.0767446
1704	0.0787151	0.0739086	1704	0.0814009	0.0760877	1704	0.0849462	0.0763524
1705	0.0787401	0.0739431	1705	0.0814807	0.0761187	1705	0.0849521	0.0772285
1706	0.0787163	0.0739884	1706	0.0817072	0.0758386	1706	0.0852609	0.0768888
1707	0.0785649	0.0740087	1707	0.0816822	0.0762987	1707	0.0852108	0.0767612
1708	0.0784934	0.0740302	1708	0.0815678	0.0757933	1708	0.0851989	0.0769329
1709	0.0783372	0.0740445	1709	0.0815642	0.0761211	1709	0.0848246	0.076772
1710	0.0784421	0.0741255	1710	0.0815499	0.0756824	1710	0.0849962	0.0769317
1711	0.078454	0.0741911	1711	0.0814843	0.0756693	1711	0.0850844	0.0771701
1712	0.0784349	0.0741196	1712	0.0816977	0.0758648	1712	0.0850749	0.0767684
1713	0.0784242	0.074228	1713	0.0818431	0.0755274	1713	0.0850129	0.0768864
1714	0.0784254	0.0741827	1714	0.0818491	0.0755274	1714	0.0852346	0.0773978
1715	0.0783861	0.0741637	1715	0.0820088	0.0753617	1715	0.0850844	0.0769055
1716	0.0783658	0.0740993	1716	0.0818717	0.0761056	1716	0.0852859	0.0767887
1717	0.0782895	0.0741422	1717	0.0817382	0.0756419	1717	0.0852239	0.0769436
1718	0.0783086	0.0741863	1718	0.0817406	0.0755775	1718	0.0854349	0.0768936
1719	0.0782883	0.0741947	1719	0.0820732	0.0756431	1719	0.0851583	0.0776494
1720	0.0782561	0.0742829	1720	0.0820005	0.0760722	1720	0.0849962	0.0767529
1721	0.0782013	0.074259	1721	0.0821829	0.0758529	1721	0.085057	0.0767839
1722	0.0782454	0.0742567	1722	0.0819945	0.0754654	1722	0.0850296	0.0770164
1723	0.0782347	0.0741744	1723	0.0820637	0.0755453	1723	0.085181	0.0769758
1724	0.0781274	0.0741863	1724	0.0821853	0.0757825	1724	0.0850999	0.0765276
1725	0.078069	0.0741577	1725	0.0819135	0.0757813	1725	0.0852001	0.0758815
1726	0.0780606	0.0742066	1726	0.0816703	0.0757277	1726	0.0851023	0.07599
1727	0.078162	0.0740945	1727	0.081507	0.0757039	1727	0.0852573	0.0766385
1728	0.0780809	0.0741315	1728	0.0819457	0.0747025	1728	0.0851762	0.076468
1729	0.0774205	0.073483	1729	0.0820923	0.075345	1729	0.0852895	0.077132
1730	0.0772738	0.0735283	1730	0.0820255	0.0759923	1730	0.0852036	0.0770628
1731	0.0774205	0.0735188	1731	0.0817239	0.0756812	1731	0.085299	0.0774229
1732	0.0775325	0.0735605	1732	0.0821054	0.0751424	1732	0.0853455	0.077976
1733	0.0777328	0.0736713	1733	0.0818872	0.0759709	1733	0.0852513	0.0769484
1734	0.0777483	0.0737596	1734	0.082022	0.0755847	1734	0.0852776	0.0776196
1735	0.0777566	0.0738394	1735	0.0819516	0.0760674	1735	0.0853956	0.0771606
1736	0.0778198	0.0738704	1736	0.0819385	0.0758648	1736	0.0852275	0.0777423
1737	0.0779653	0.0738895	1737	0.0820947	0.0759149	1737	0.0851333	0.0770652
1738	0.0781226	0.0739086	1738	0.0820363	0.0760901	1738	0.0850594	0.0768805
1739	0.0782621	0.0738311	1739	0.0821424	0.075649	1739	0.0849104	0.0770891
1740	0.0782025	0.0738668	1740	0.0820374	0.0755322	1740	0.0854313	0.0766313
1741	0.0782084	0.0738621	1741	0.0820982	0.0756514	1741	0.085324	0.0771952
1742	0.0780666	0.0739586	1742	0.0822175	0.0758863	1742	0.0854254	0.0774348
1743	0.078088	0.0740194	1743	0.0821674	0.0764179	1743	0.085057	0.0766182
1744	0.0779498	0.0739312	1744	0.0821912	0.0755024	1744	0.0852013	0.0765038
1745	0.0779879	0.0738609	1745	0.0821614	0.0762546	1745	0.0852191	0.0775075
1746	0.0779366	0.0737953	1746	0.0821292	0.075717	1746	0.085392	0.0773537
1747	0.0779808	0.073843	1747	0.0822628	0.0759578	1747	0.0852883	0.0777972
1748	0.0780201	0.0737989	1748	0.0822771	0.0763106	1748	0.0853419	0.0768483
1749	0.0778198	0.0737989	1749	0.0821149	0.0765014	1749	0.085423	0.0776947
1750	0.0777555	0.0737214	1750	0.0820839	0.0758374	1750	0.0853503	0.0777018
1751	0.0777316	0.0737154	1751	0.0820673	0.07622	1751	0.085187	0.076896
1752	0.0778198	0.0736201	1752	0.0822735	0.0762808	1752	0.0855625	0.0771487
1753	0.0780714	0.0736094	1753	0.0822854	0.0765133	1753	0.085454	0.077014
1754	0.0781202	0.0736964	1754	0.0823903	0.0764298	1754	0.0854397	0.0766635
1755	0.0782132	0.0737548	1755	0.0822902	0.0762272	1755	0.0850439	0.0772202
1756	0.0781357	0.0738394	1756	0.0824451	0.0763786	1756	0.0853693	0.0769556
1757	0.0781679	0.07375	1757	0.082165	0.076592	1757	0.0851715	0.077734
1758	0.0780857	0.0737381	1758	0.0820315	0.0765061	1758	0.0852942	0.0768006
1759	0.0782382	0.0737786	1759	0.0816715	0.0762761	1759	0.0854588	0.0768936
1760	0.0783098	0.0737643	1760	0.0816321	0.0764346	1760	0.0852644	0.0766456
1761	0.0782871	0.0737643	1761	0.0816822	0.0758338	1761	0.0854576	0.0770819
1762	0.0783861	0.0738275	1762	0.0812697	0.0763142	1762	0.0851583	0.0775945
1763	0.0783837	0.073818	1763	0.081321	0.076232	1763	0.0852823	0.0772572
1764	0.0783408	0.0739074	1764	0.0812531	0.0762737	1764	0.0853908	0.0759816
1765	0.0783765	0.0739563	1765	0.0814176	0.0756884	1765	0.0852621	0.0768805
1766	0.0784945	0.0739706	1766	0.081526	0.0758457	1766	0.0851333	0.0767934
1767	0.0785565	0.0739145	1767	0.0813866	0.0757909	1767	0.0849426	0.0768352
1768	0.078634	0.0739014	1768	0.0815547	0.0762486	1768	0.0848341	0.0763309
1769	0.0786912	0.073899	1769	0.0816083	0.0761449	1769	0.0849426	0.0771558
1770	0.0786603	0.0739551	1770	0.0817072	0.0757766	1770	0.0853109	0.0768316
1771	0.0785863	0.0739813	1771	0.0816846	0.0761902	1771	0.085032	0.0766921
1772	0.0784695	0.0740123	1772	0.0816071	0.0758123	1772	0.0852025	0.0768185
1773	0.0784004	0.0740099	1773	0.0816035	0.0761259	1773	0.0847054	0.0766468
1774	0.0783801	0.0741327	1774	0.0816631	0.0757456	1774	0.0849497	0.076977
1775	0.0783777	0.0741231	1775	0.0816214	0.0756276	1775	0.0851691	0.0773609
1776	0.0783348	0.0741208	1776	0.0817418	0.0757456	1776	0.0850117	0.0768435
1777	0.0784469	0.0741696	1777	0.0818789	0.0755119	1777	0.0851059	0.0769472
1778	0.0784159	0.0742006	1778	0.0818503	0.0755143	1778	0.0853264	0.0773907
1779	0.0783849	0.0741923	1779	0.0820124	0.0753903	1779	0.0850117	0.0769472
1780	0.0783622	0.0741804	1780	0.081805	0.0759339	1780	0.0853443	0.0768507
1781	0.0782776	0.0741744	1781	0.0818431	0.0756645	1781	0.0851691	0.0769114
1782	0.0782931	0.0742328	1782	0.0817668	0.0756896	1782	0.0853515	0.0769484
1783	0.0782871	0.0741971	1783	0.0821424	0.0757074	1783	0.0851059	0.0776637
1784	0.0782478	0.0742722	1784	0.0819921	0.0761569	1784	0.085119	0.0769114
1785	0.0782239	0.0742626	1785	0.0821185	0.0758362	1785	0.0851393	0.0768554
1786	0.0782037	0.0742364	1786	0.0820088	0.0755751	1786	0.0850916	0.077064
1787	0.0782287	0.0741971	1787	0.0819957	0.075568	1787	0.085218	0.0770652
1788	0.0781429	0.0742078	1788	0.082128	0.0756741	1788	0.0852132	0.0766635
1789	0.0780606	0.0741935	1789	0.0818336	0.075779	1789	0.0852036	0.0758517
1790	0.0779903	0.0741494	1790	0.0815451	0.0757146	1790	0.0850904	0.0760651
1791	0.0780451	0.0740457	1791	0.0816286	0.0756896	1791	0.0853777	0.0766027
1792	0.0781393	0.0741255	1792	0.0820529	0.0748205	1792	0.085175	0.0764227
1793	0.0773752	0.0735033	1793	0.0818908	0.0754225	1793	0.0852871	0.0771153
1794	0.0772977	0.0734842	1794	0.0818789	0.0759339	1794	0.085206	0.0771546
1795	0.077467	0.073452	1795	0.081687	0.0756681	1795	0.0854814	0.0773621
1796	0.077498	0.0735641	1796	0.0821483	0.0751078	1796	0.0853527	0.0778866
1797	0.0776803	0.0736916	1797	0.0819182	0.0760329	1797	0.0852859	0.0770235
1798	0.0777304	0.0737941	1798	0.0820124	0.0755739	1798	0.0852144	0.0776565
1799	0.0778317	0.0738513	1799	0.0819504	0.075978	1799	0.0854456	0.0771427
1800	0.0778615	0.0738752	1800	0.0818956	0.0758803	1800	0.0853431	0.0778186
1801	0.0779045	0.0738835	1801	0.0819695	0.0759208	1801	0.0851822	0.0771499
1802	0.0780499	0.0738788	1802	0.0821555	0.076139	1802	0.0851321	0.0769114
1803	0.078243	0.0738251	1803	0.0821054	0.0755334	1803	0.084964	0.077194
1804	0.0782657	0.0738204	1804	0.0819755	0.0755703	1804	0.0855362	0.0766432
1805	0.0783193	0.0738525	1805	0.0820994	0.0756478	1805	0.0853395	0.0769949
1806	0.0781953	0.073911	1806	0.0823021	0.0756645	1806	0.0854218	0.077486
1807	0.0782359	0.0739169	1807	0.082134	0.0762105	1807	0.084976	0.0766802
1808	0.0780559	0.0738978	1808	0.0821865	0.0754118	1808	0.0851405	0.0765336
1809	0.0780666	0.073818	1809	0.0821912	0.0762713	1809	0.085268	0.0774586
1810	0.0779605	0.0738108	1810	0.081917	0.075742	1810	0.0853813	0.0772941
1811	0.0780118	0.0738215	1811	0.0821769	0.0757551	1811	0.0853038	0.0779438
1812	0.0780594	0.073818	1812	0.0821733	0.0763047	1812	0.0853539	0.0768208
1813	0.0779831	0.0737655	1813	0.0820601	0.0764441	1813	0.0854325	0.0776482
1814	0.0778151	0.0737047	1814	0.0821126	0.0758886	1814	0.0854445	0.0777173
1815	0.0778103	0.0736868	1815	0.0821853	0.0763142	1815	0.0852048	0.0769699
1816	0.0778818	0.0736117	1816	0.0821865	0.0763285	1816	0.0854397	0.0771213
1817	0.0780666	0.0736284	1817	0.0821531	0.0763941	1817	0.0854802	0.0770223
1818	0.0781846	0.0736749	1818	0.0822902	0.0764322	1818	0.0853395	0.0766206
1819	0.0782335	0.0738251	1819	0.0820827	0.0762236	1819	0.0849998	0.0772214
1820	0.0782204	0.0738752	1820	0.0823331	0.0762701	1820	0.0854743	0.0769281
1821	0.0782371	0.0737154	1821	0.0820887	0.0766039	1821	0.0851798	0.07761
1822	0.0782192	0.0737059	1822	0.0818527	0.0764227	1822	0.0852418	0.0769484
1823	0.0782812	0.0737321	1823	0.0814962	0.0763023	1823	0.0853574	0.076797
1824	0.0783145	0.0737858	1824	0.0813508	0.0763559	1824	0.0852215	0.0765669
1825	0.0782752	0.0737834	1825	0.0815117	0.0757718	1825	0.0856149	0.0768757
1826	0.0784075	0.0738347	1826	0.0814068	0.0763249	1826	0.0851893	0.0775886
1827	0.0783944	0.0738335	1827	0.0814521	0.0762165	1827	0.0853729	0.0773776
1828	0.0782764	0.0739276	1828	0.0813806	0.0764513	1828	0.0853848	0.0759888
1829	0.0783038	0.0739241	1829	0.0814033	0.0757122	1829	0.0851595	0.0769174
1830	0.0783849	0.0739753	1830	0.0816214	0.0758278	1830	0.0849748	0.0768697
1831	0.0783873	0.0738919	1831	0.0815105	0.0759315	1831	0.0849795	0.076797
1832	0.0784826	0.0739026	1832	0.0817287	0.0762606	1832	0.0848722	0.0763392
1833	0.0786102	0.0738811	1833	0.0816441	0.0761688	1833	0.0850344	0.077163
1834	0.0785732	0.073961	1834	0.0816715	0.0756729	1834	0.0853181	0.0769198
1835	0.0785816	0.0740111	1835	0.0816977	0.0761378	1835	0.0848448	0.0766814
1836	0.0784981	0.0740564	1836	0.0817204	0.0758481	1836	0.085355	0.0767088
1837	0.0784159	0.0740206	1837	0.0815976	0.0760365	1837	0.0848377	0.0767374
1838	0.078392	0.0740159	1838	0.0815856	0.0757778	1838	0.0849223	0.0769567
1839	0.0783312	0.0740075	1839	0.0815988	0.075717	1839	0.0851381	0.0773215
1840	0.0782752	0.0740135	1840	0.0818884	0.0756168	1840	0.0849807	0.0768518
1841	0.0783706	0.0741482	1841	0.0819409	0.0755501	1841	0.0851703	0.0770187
1842	0.0783324	0.0742042	1842	0.0819099	0.0755346	1842	0.0853729	0.0773585
1843	0.078404	0.0742388	1843	0.0819659	0.0754642	1843	0.0850391	0.0771034
1844	0.078373	0.0742233	1844	0.0817573	0.0759399	1844	0.0853693	0.0767756
1845	0.0783038	0.0741446	1845	0.0819051	0.0756717	1845	0.0851452	0.076952
1846	0.078249	0.0742352	1846	0.0819278	0.0757146	1846	0.0852406	0.0770366
1847	0.0782108	0.0741875	1847	0.0822532	0.0757861	1847	0.0851321	0.07761
1848	0.0782335	0.0742269	1848	0.0819945	0.0763392	1848	0.0851727	0.0769675
1849	0.0781918	0.0742447	1849	0.0821161	0.0757873	1849	0.0852072	0.0770211
1850	0.078212	0.0742495	1850	0.0820804	0.0756419	1850	0.0850713	0.0770366
1851	0.0782204	0.0742733	1851	0.0819254	0.0756001	1851	0.0852036	0.077126
1852	0.0781488	0.0741792	1852	0.0820208	0.075655	1852	0.0852335	0.0766897
1853	0.078094	0.0741649	1853	0.0816536	0.0758076	1853	0.0853062	0.0758553
1854	0.0780046	0.0741649	1854	0.0815105	0.0756431	1854	0.0850964	0.0760937
1855	0.0780249	0.0741053	1855	0.0816607	0.0756645	1855	0.0856304	0.0764537
1856	0.0781167	0.0741959	1856	0.0819838	0.0748742	1856	0.0850773	0.076344
1857	0.0774074	0.0734627	1857	0.0818074	0.0755024	1857	0.085268	0.0770521
1858	0.0773168	0.0734222	1858	0.0818539	0.0759554	1858	0.0851321	0.0772262
1859	0.0774372	0.0733984	1859	0.0816274	0.0757205	1859	0.0854564	0.077281
1860	0.0775731	0.0736046	1860	0.0821435	0.0750518	1860	0.085386	0.0778556
1861	0.077616	0.0737059	1861	0.0819266	0.0759828	1861	0.0852978	0.077107
1862	0.0776899	0.0737917	1862	0.0819802	0.0755954	1862	0.0852406	0.0776815
1863	0.0777733	0.0738037	1863	0.0820053	0.0760031	1863	0.085448	0.0771391
1864	0.0778711	0.0738227	1864	0.0818396	0.0758433	1864	0.0853348	0.077889
1865	0.0779343	0.0738633	1865	0.081979	0.0759315	1865	0.0851393	0.0771928
1866	0.0779712	0.0738525	1866	0.0821853	0.076133	1866	0.0852883	0.0769734
1867	0.0781429	0.0738215	1867	0.0819647	0.0753689	1867	0.0850773	0.0773132
1868	0.078249	0.0737917	1868	0.081923	0.0756931	1868	0.0856757	0.0765717
1869	0.078336	0.0737894	1869	0.0821662	0.0757122	1869	0.0852811	0.0766742
1870	0.0782847	0.0738108	1870	0.0822794	0.0754416	1870	0.0853729	0.0775802
1871	0.0782728	0.0737453	1871	0.0820291	0.076071	1871	0.0849795	0.0767946
1872	0.0781465	0.0738382	1872	0.0821686	0.0752425	1872	0.0851452	0.076437
1873	0.0781631	0.0738192	1873	0.0821269	0.076226	1873	0.0852394	0.0774086
1874	0.0780582	0.0738418	1874	0.0818217	0.0758231	1874	0.0853133	0.0772321
1875	0.0780284	0.0738585	1875	0.0821424	0.0755823	1875	0.0852716	0.0779629
1876	0.0780606	0.0737905	1876	0.0822067	0.0762117	1876	0.0853634	0.0767839
1877	0.0780678	0.0737047	1877	0.0821078	0.0764406	1877	0.0853801	0.0777853
1878	0.0779486	0.0736523	1878	0.0821149	0.07581	1878	0.0854111	0.0776339
1879	0.0778878	0.0735807	1879	0.0822759	0.0763333	1879	0.0852025	0.077033
1880	0.0779247	0.0735855	1880	0.0821173	0.0763595	1880	0.0853419	0.077045
1881	0.0780559	0.0736439	1881	0.0820804	0.0763702	1881	0.0855255	0.0771892
1882	0.0782013	0.0737035	1882	0.0820494	0.0763762	1882	0.0852597	0.0765967
1883	0.0782752	0.0738049	1883	0.0819266	0.0761819	1883	0.085088	0.0771272
1884	0.0782669	0.0738466	1884	0.0822222	0.0760913	1884	0.0855815	0.0770152
1885	0.0782847	0.0736845	1885	0.0818896	0.0765479	1885	0.0850976	0.07743
1886	0.0782955	0.0736666	1886	0.0816	0.0764537	1886	0.085088	0.0770652
1887	0.0783241	0.0736725	1887	0.0813532	0.0763762	1887	0.0853789	0.0767994
1888	0.0782919	0.073818	1888	0.081234	0.0763261	1888	0.0852692	0.07653
1889	0.0782621	0.0738895	1889	0.0814688	0.0756931	1889	0.0856578	0.0766695
1890	0.0783491	0.0738978	1890	0.0814855	0.0763249	1890	0.0851476	0.077579
1891	0.0783336	0.0738633	1891	0.0815141	0.0762522	1891	0.0852716	0.0774693
1892	0.0782847	0.07393	1892	0.081389	0.0765204	1892	0.0853276	0.0760973
1893	0.0782728	0.0739551	1893	0.0814271	0.0757861	1893	0.0851047	0.0769854
1894	0.078305	0.0739658	1894	0.0816476	0.0759196	1894	0.0849319	0.0769281
1895	0.0782776	0.07388	1895	0.0815952	0.0759888	1895	0.0850117	0.0767767
1896	0.0783491	0.0739205	1896	0.0817692	0.0761664	1896	0.0849533	0.0762892
1897	0.0784981	0.0738943	1897	0.0816011	0.0762236	1897	0.0850844	0.0772297
1898	0.0784683	0.0740063	1898	0.0816798	0.0757003	1898	0.0853145	0.0769222
1899	0.0784922	0.074023	1899	0.0816834	0.0760245	1899	0.084784	0.0767052
1900	0.0785136	0.07406	1900	0.0818014	0.0758791	1900	0.0854731	0.0765765
1901	0.0784123	0.0739944	1901	0.0815189	0.0759792	1901	0.0850236	0.0767851
1902	0.0783372	0.0739276	1902	0.0815511	0.075742	1902	0.0849235	0.0770354
1903	0.0783288	0.0739384	1903	0.0816453	0.0757658	1903	0.0851989	0.0774431
1904	0.0782609	0.0739861	1904	0.081979	0.075568	1904	0.0849772	0.0768208
1905	0.0782788	0.0741231	1905	0.0820076	0.0755775	1905	0.085274	0.0770473
1906	0.078249	0.0741506	1906	0.0818968	0.0754833	1906	0.0853002	0.0773633
1907	0.0783336	0.0742543	1907	0.0819087	0.0755203	1907	0.085032	0.077312
1908	0.0783265	0.0742698	1908	0.0816941	0.0760388	1908	0.0853837	0.0767446
1909	0.0783098	0.0742042	1909	0.0820601	0.0756061	1909	0.0851476	0.0770569
1910	0.0782692	0.0742197	1910	0.0820673	0.0756836	1910	0.0853229	0.0770962
1911	0.0782955	0.074147	1911	0.0822091	0.0758481	1911	0.0852358	0.0775206
1912	0.0782156	0.0742328	1912	0.0820196	0.076431	1912	0.0852215	0.0769734
1913	0.0781953	0.0742304	1913	0.0820577	0.0758326	1913	0.0852954	0.0771487
1914	0.0781393	0.0742841	1914	0.0819588	0.0757051	1914	0.0850761	0.077045
1915	0.0782192	0.0743353	1915	0.0817692	0.0755358	1915	0.0851119	0.0771463
1916	0.0781596	0.0741434	1916	0.0818765	0.0756431	1916	0.0852728	0.0767636
1917	0.0780833	0.07411	1917	0.0815487	0.0757098	1917	0.0853372	0.0757933
1918	0.0780547	0.0742018	1918	0.081538	0.0755477	1918	0.0851512	0.0761414
1919	0.0780404	0.0742161	1919	0.0816882	0.0756276	1919	0.0857687	0.0763369
1920	0.078088	0.0742805	1920	0.0820327	0.0748706	1920	0.0851119	0.0762761
1921	0.077368	0.0734627	1921	0.0817561	0.075556	1921	0.0852859	0.0770903
1922	0.0773787	0.073365	1922	0.081923	0.0760031	1922	0.0850785	0.077163
1923	0.07743	0.0734031	1923	0.0817347	0.0759101	1923	0.0853539	0.0771093
1924	0.0775993	0.0735962	1924	0.082072	0.0750124	1924	0.0853562	0.0778401
1925	0.0775814	0.0737286	1925	0.0818825	0.0759065	1925	0.0852919	0.0771511
1926	0.0776756	0.0737429	1926	0.0819385	0.0755489	1926	0.0853217	0.0778079
1927	0.077697	0.0737047	1927	0.0820112	0.0760269	1927	0.0854433	0.0770962
1928	0.0778556	0.0737834	1928	0.0818849	0.0758576	1928	0.0852668	0.077858
1929	0.0779009	0.073756	1929	0.0820553	0.0758457	1929	0.0852656	0.0771761
1930	0.0779831	0.0737512	1930	0.0821078	0.0760794	1930	0.0853693	0.0772047
1931	0.0780678	0.0737643	1931	0.0818431	0.0753045	1931	0.0851941	0.0773513
1932	0.0782251	0.0737619	1932	0.0818169	0.0757694	1932	0.0856864	0.076493
1933	0.0782204	0.0736845	1933	0.0821865	0.075742	1933	0.0852096	0.0763893
1934	0.0783229	0.0736642	1934	0.0821948	0.0752735	1934	0.0854349	0.0775337
1935	0.0783038	0.0736248	1935	0.082016	0.0760341	1935	0.0850344	0.07689
1936	0.0781894	0.0737989	1936	0.0821173	0.0751269	1936	0.0852883	0.0764215
1937	0.0782394	0.0738144	1937	0.0819194	0.0761247	1937	0.0852191	0.0771475
1938	0.0780845	0.0738347	1938	0.0817442	0.0758231	1938	0.0852644	0.0772035
1939	0.0780845	0.0738454	1939	0.0822544	0.0755298	1939	0.0852692	0.077877
1940	0.078069	0.073725	1940	0.0822568	0.0761306	1940	0.085454	0.076735
1941	0.0780761	0.0737095	1941	0.0821042	0.076375	1941	0.0854158	0.0777829
1942	0.0780308	0.0736201	1942	0.082072	0.0757492	1942	0.0853419	0.0776565
1943	0.0779903	0.0735521	1943	0.0822139	0.0763154	1943	0.0852215	0.077045
1944	0.0779903	0.0736141	1944	0.0820994	0.0763214	1944	0.0852597	0.0768971
1945	0.0780725	0.0736165	1945	0.0820744	0.0763965	1945	0.0856042	0.0772631
1946	0.0782192	0.0737107	1946	0.0819063	0.0763559	1946	0.0852227	0.0765312
1947	0.0782609	0.0737607	1947	0.0818682	0.0760615	1947	0.0851548	0.0770462
1948	0.0782561	0.0738382	1948	0.0821149	0.0759554	1948	0.0855207	0.0770295
1949	0.0783277	0.0737274	1949	0.0816453	0.0764346	1949	0.0850618	0.0773907
1950	0.0782752	0.0737095	1950	0.0814068	0.0764334	1950	0.0850308	0.0770903
1951	0.0782871	0.0736666	1951	0.0812721	0.0764298	1951	0.0853741	0.0768459
1952	0.0782681	0.0738049	1952	0.0811887	0.0762939	1952	0.0853729	0.0764167
1953	0.0782287	0.0738633	1953	0.0814927	0.0756335	1953	0.0856316	0.0765407
1954	0.0782692	0.0739026	1954	0.0814724	0.0763571	1954	0.0850701	0.0775325
1955	0.0782239	0.0738144	1955	0.0815248	0.0762773	1955	0.0851107	0.0774348
1956	0.0782359	0.0738525	1956	0.0814354	0.0764787	1956	0.0852299	0.0762212
1957	0.0782454	0.0739229	1957	0.0815046	0.0759065	1957	0.0851059	0.076977
1958	0.0782406	0.0739133	1958	0.0815785	0.0758815	1958	0.0850868	0.0769794
1959	0.0782323	0.0739241	1959	0.081681	0.0760233	1959	0.0849724	0.0767148
1960	0.078305	0.0739539	1960	0.0818729	0.0760221	1960	0.0850415	0.0763154
1961	0.0783408	0.0739944	1961	0.0816727	0.0762463	1961	0.0850654	0.0772297
1962	0.0783491	0.0739992	1962	0.0816488	0.0756907	1962	0.0853407	0.0770879
1963	0.0783885	0.0739741	1963	0.0817931	0.0759995	1963	0.0848758	0.0767982
1964	0.0784123	0.0740027	1964	0.08178	0.0757825	1964	0.0855994	0.07658
1965	0.078454	0.0739765	1965	0.0814366	0.0759244	1965	0.0851762	0.0769353
1966	0.0783384	0.0739455	1966	0.0815785	0.075686	1966	0.0850499	0.0771403
1967	0.0783229	0.0739527	1967	0.0817823	0.0758314	1967	0.0852871	0.0774753
1968	0.0782251	0.0740576	1968	0.0821197	0.0755537	1968	0.0850141	0.0768685
1969	0.0782907	0.0741279	1969	0.0820673	0.0755405	1969	0.0852942	0.0769663
1970	0.0782406	0.0741518	1970	0.0819039	0.0753784	1970	0.0853252	0.0772405
1971	0.0782251	0.0742126	1971	0.081898	0.0754511	1971	0.0850582	0.0774693
1972	0.0782347	0.0742388	1972	0.0817049	0.0761318	1972	0.0853646	0.0768721
1973	0.0782132	0.0742352	1973	0.0821483	0.0755596	1973	0.085237	0.0771594
1974	0.07828	0.074203	1974	0.0820982	0.0756288	1974	0.0853741	0.0770521
1975	0.0783455	0.0741184	1975	0.082227	0.0757587	1975	0.085336	0.0773573
1976	0.0783074	0.0742388	1976	0.0821078	0.076443	1976	0.085206	0.0769639
1977	0.0782371	0.0742424	1977	0.0820255	0.0759017	1977	0.0852263	0.0771081
1978	0.0782132	0.0742877	1978	0.0818872	0.0757825	1978	0.0851071	0.0770354
1979	0.0782132	0.0742996	1979	0.0815797	0.075525	1979	0.0849581	0.0770092
1980	0.0782049	0.0741172	1980	0.081687	0.0755823	1980	0.0852919	0.076859
1981	0.0782073	0.0741029	1981	0.0814438	0.0755847	1981	0.0854039	0.0758433
1982	0.0780725	0.074228	1982	0.0815916	0.0755584	1982	0.0852811	0.0762808
1983	0.0780582	0.0742662	1983	0.0816774	0.0756073	1983	0.0858784	0.0762355
1984	0.0781202	0.0743008	1984	0.0819683	0.0748682	1984	0.0851381	0.0761759
1985	0.0773478	0.073446	1985	0.0816894	0.0757003	1985	0.0852275	0.0772142
1986	0.0773954	0.0733852	1986	0.0819051	0.0761187	1986	0.0850177	0.0770879
1987	0.0775158	0.0734198	1987	0.0817561	0.0760722	1987	0.0853789	0.0768745
1988	0.0775981	0.0735915	1988	0.0819755	0.0750935	1988	0.085268	0.0778437
1989	0.0776255	0.0736701	1989	0.08183	0.0759029	1989	0.085386	0.0770903
1990	0.0776327	0.0737131	1990	0.0819397	0.0754595	1990	0.0853181	0.0779557
1991	0.0776243	0.0736403	1991	0.0820899	0.0759351	1991	0.0853062	0.0770545
1992	0.0777447	0.0736427	1992	0.0819635	0.0759172	1992	0.0852203	0.0777638
1993	0.077877	0.0736821	1993	0.082041	0.0757027	1993	0.0853348	0.077107
1994	0.077945	0.073669	1994	0.0820017	0.0760126	1994	0.0854194	0.0773513
1995	0.0779438	0.0737071	1995	0.0818121	0.075196	1995	0.0852835	0.077374
1996	0.0781202	0.0736547	1996	0.081768	0.0757384	1996	0.0856435	0.0765717
1997	0.0781822	0.0735414	1997	0.0821483	0.0757194	1997	0.0852156	0.076263
1998	0.0782466	0.0735819	1998	0.0821078	0.0751758	1998	0.0855446	0.0775576
1999	0.0783098	0.0736582	1999	0.0819516	0.0759888	1999	0.085119	0.0769019
[truncated: 14,392 more rows]
