# Supplementary material for: Contributions of lunate cells and wax crystals to the surface anisotropy of Nepenthes slippery zone
Source: R Soc Open Sci. 2018 Sep 5;5(9):180766. doi: 10.1098/rsos.180766 (PMC6170553; doi:10.1098/rsos.180766)
Supplement: Data of the difference in friction data [file rsos180766supp5.xls]

## Sheet: Sheet1
Normalforce/nN	100	200	300	400	500	800	1100	1200	1500	1650	2000	2300	2500	3000
(T-RT)/RT %	1.9299	2.5694	2.5816	5.2732	4.8305	5.4817	5.9645	6.856	7.1123	7.767	11.9331	10.752	12.3673	12.9051
	1.9787	2.4269	2.6608	4.8908	4.7632	5.9991	6.2397	8.4041	7.514	8.09647	13.1659	11.3869	12.6543	16.665
	1.9472	2.53589	2.7029	4.9253	4.8684	5.8267	6.0967	8.3011	7.9696	8.1293	12.2753	12.0592	12.5007	14.2601
	1.8092	2.3628	2.9386	4.7579	6.5042	5.6943	6.5094	8.0967	7.9027	8.2381	11.9784	11.6017	12.6028	14.7063
mean	1.91625	2.47375	2.72098	4.9618	5.24158	5.75045	6.20257	7.91447	7.62465	8.05772	12.3382	11.4499	12.5313	14.6341
sd	0.0741708	0.095769	0.153551	0.219787	0.842873	0.218342	0.233387	0.717121	0.396253	0.203044	0.572307	0.543238	0.126588	1.55554
Normal force	100	200	300	400	500	800	1100	1200	1500	1650	2000	2300	2500	3000
	1.91625	2.47375	2.72098	4.9618	5.24158	5.75045	6.20257	7.91447	7.62465	8.05772	12.3382	11.4499	12.5313	14.6316	mean
	0.0741708	0.095769	0.153551	0.219787	0.842873	0.218342	0.233387	0.717121	0.396253	0.203044	0.572307	0.543238	0.126588	1.55119	sd
									mean
									sd
Load force/ nN	100	200	300	400	500	800	1100	1200	1500	1650	2000	2300	2500	3000
RT-downward	1.33655	1.36712	1.36932	1.37264	1.36634	0.537436	0.0780049	0.564693	0.55584	0.0818728	0.560698	0.0851743	0.560924	0.547238	mean
	0.00559345	0.0103138	0.00778104	0.0118745	0.00808252	0.00579897	0.00045749	0.0120828	0.00643209	0.000308447	0.014831	0.000223183	0.0147121	0.0114336	sd
T-upward	1.32214	1.33287	1.33486	1.30388	1.30338	0.507019	0.0736142	0.520914	0.516993	0.075972	0.50072	0.0769055	0.498301	0.478941	mean
	0.00973398	0.0078863	0.0144809	0.0141261	0.0221439	0.0126228	0.000377144	0.0102973	0.0125276	0.00064597	0.0200599	0.000580728	0.014854	0.0141298	sd
Load force/ nN	100	200	300	400	500
RT-downward	1.33655	1.36712	1.36932	1.37264	1.36634
T-upward	1.32214	1.33287	1.33486	1.30388	1.30338
RT-downward	0.00559345	0.0103138	0.00778104	0.0118745	0.00808252
T-upward	0.00973398	0.0078863	0.0144809	0.0141261	0.0221439
Load force/ nN	800	1200	1500	2000	2500	3000
RT-downward	0.537436	0.564693	0.55584	0.560698	0.560924	0.547238
T-upward	0.507019	0.520914	0.516993	0.50072	0.498301	0.478941
RT-downward	0.00579897	0.0120828	0.00643209	0.014831	0.0147121	0.0114336
T-upward	0.0126228	0.0102973	0.0125276	0.0200599	0.014854	0.0141298
Load force/ nN	1100	1650	2300
RT-downward	0.0780049	0.0818728	0.0851743
T-upward	0.0736142	0.075972	0.0769055
RT-downward	0.00045749	0.000308447	0.000283183
T-upward	0.000377144	0.00064597	0.000580728
